# Supplementary material
Source: publisher figshare collection journal article supplement (https://acs.figshare.com/ndownloader/files/4148224)
Supplement: Supplementary file 1 [file 4148224]

data_global

# start Validation Reply Form
_vrf_PUBL012_GLOBAL
;
PROBLEM: _publ_section_abstract is missing.
RESPONSE: ...
;
# end Validation Reply Form

#Added by publCIF (Do 3. Mai 13:26:40 2012)


_audit_update_record
;
2012-05-03 # Formatted by publCIF
;

#  1. SUBMISSION DETAILS

_publ_contact_author
;
      Matthias Westerhausen
      Institut f\"ur anorganische und analytische Chemie
      Friedrich-Schiller-Universit\"at Jena
      August-Bebel-Str. 2
      07743 Jena
      Germany
;
_publ_contact_author_phone        '03641 948 110'
_publ_contact_author_fax          '03641 948 102'
_publ_contact_author_email         m.we@uni-jena.de
_publ_requested_journal           'Eur. J. Inorg. Chem.'

#  3. TITLE AND AUTHOR LIST

_publ_section_title
;
Oxidation Products of Calcium and Strontium Bis(diphenylphosphanide)
;

loop_
_publ_author_name
_publ_author_address
      'Matthias Westerhausen'
;     Institut f\"ur anorganische und analytische Chemie
      Friedrich-Schiller-Universit\"at Jena
      Humboldt-Str. 8
      D-07743 Jena
      Germany
;
      'Tareq M. A. Al-Shboul '
;     Institut f\"ur anorganische und analytische Chemie
      Friedrich-Schiller-Universit\"at Jena
      Humboldt-Str. 8
      D-07743 Jena
      Germany
;      
      'Gritt Volland '
;     Institut f\"ur anorganische und analytische Chemie
      Friedrich-Schiller-Universit\"at Jena
      Humboldt-Str. 8
      D-07743 Jena
      Germany
;      
      'Sven Krieck '
;     Institut f\"ur anorganische und analytische Chemie
      Friedrich-Schiller-Universit\"at Jena
      Humboldt-Str. 8
      D-07743 Jena
      Germany
;      
      'Helmar G\"orls'
;     Institut f\"ur anorganische und analytische Chemie
      Friedrich-Schiller-Universit\"at Jena
      Humboldt-Str. 8
      D-07743 Jena
      Germany
;
#

 
  
data_FO4517 
 
_audit_creation_method            SHELXL-97 
_chemical_name_systematic 
? 
_chemical_name_common             ? 
_chemical_melting_point           ? 
_chemical_formula_moiety          'C40 H52 Ca O6 P2'
_chemical_formula_sum             'C40 H52 Ca O6 P2' 
_chemical_formula_weight          730.84 
 
loop_ 
 _atom_type_symbol 
 _atom_type_description 
 _atom_type_scat_dispersion_real 
 _atom_type_scat_dispersion_imag 
 _atom_type_scat_source 
 'C'  'C'   0.0033   0.0016 
 'International Tables Vol C Tables 4.2.6.8 and 6.1.1.4' 
 'H'  'H'   0.0000   0.0000 
 'International Tables Vol C Tables 4.2.6.8 and 6.1.1.4' 
 'O'  'O'   0.0106   0.0060 
 'International Tables Vol C Tables 4.2.6.8 and 6.1.1.4' 
 'P'  'P'   0.1023   0.0942 
 'International Tables Vol C Tables 4.2.6.8 and 6.1.1.4' 
 'Ca'  'Ca'   0.2262   0.3064 
 'International Tables Vol C Tables 4.2.6.8 and 6.1.1.4' 
 
_symmetry_cell_setting            monoclinic
_symmetry_space_group_name_H-M    'P 21/c'
_symmetry_space_group_name_Hall   '-P 2ybc'
 
loop_ 
 _symmetry_equiv_pos_as_xyz 
 'x, y, z' 
 '-x, y+1/2, -z+1/2' 
 '-x, -y, -z' 
 'x, -y-1/2, z-1/2' 
 
_cell_length_a                    9.7050(2) 
_cell_length_b                    8.5891(1) 
_cell_length_c                    23.5100(6) 
_cell_angle_alpha                 90.00 
_cell_angle_beta                  92.052(1) 
_cell_angle_gamma                 90.00 
_cell_volume                      1958.47(7) 
_cell_formula_units_Z             2 
_cell_measurement_temperature     133(2) 
_cell_measurement_reflns_used     12668
_cell_measurement_theta_min       2.52
_cell_measurement_theta_max       27.47
 
_exptl_crystal_description        prism 
_exptl_crystal_colour             colourless
_exptl_crystal_size_max           0.06 
_exptl_crystal_size_mid           0.05 
_exptl_crystal_size_min           0.04 
_exptl_crystal_density_meas       ? 
_exptl_crystal_density_diffrn     1.239 
_exptl_crystal_density_method     'not measured' 
_exptl_crystal_F_000              780 
_exptl_absorpt_coefficient_mu     0.286 
_exptl_absorpt_correction_type    none 
_exptl_absorpt_correction_T_min   ?
_exptl_absorpt_correction_T_max   ?
_exptl_absorpt_process_details    ? 
 
_exptl_special_details 
? 
 
_diffrn_ambient_temperature       133(2) 
_diffrn_radiation_wavelength      0.71073 
_diffrn_radiation_type            MoK\a 
_diffrn_radiation_source          'fine-focus sealed tube' 
_diffrn_radiation_monochromator   graphite 
_diffrn_measurement_device_type   KappaCCD 
_diffrn_measurement_method        'phi- + omega-scan'
_diffrn_detector_area_resol_mean  ? 
_diffrn_reflns_number             12668 
_diffrn_reflns_av_R_equivalents   0.0246 
_diffrn_reflns_av_sigmaI/netI     0.0265 
_diffrn_reflns_limit_h_min        -12 
_diffrn_reflns_limit_h_max        12 
_diffrn_reflns_limit_k_min        -11 
_diffrn_reflns_limit_k_max        11 
_diffrn_reflns_limit_l_min        -25 
_diffrn_reflns_limit_l_max        30 
_diffrn_reflns_theta_min          2.52 
_diffrn_reflns_theta_max          27.47 
_reflns_number_total              4472 
_reflns_number_gt                 4052 
_reflns_threshold_expression      >2sigma(I) 
 
_computing_data_collection        COLLECT 
_computing_cell_refinement        DENZO
_computing_data_reduction         DENZO
_computing_structure_solution     'SHELXS-97 (Sheldrick, 2008)' 
_computing_structure_refinement   'SHELXL-97 (Sheldrick, 2008)' 
_computing_molecular_graphics     SHELXTL/PC
_computing_publication_material   SHELXL-97
 
_refine_special_details 
; 
 Refinement of F^2^ against ALL reflections.  The weighted R-factor wR and 
 goodness of fit S are based on F^2^, conventional R-factors R are based 
 on F, with F set to zero for negative F^2^. The threshold expression of 
 F^2^ > 2sigma(F^2^) is used only for calculating R-factors(gt) etc. and is 
 not relevant to the choice of reflections for refinement.  R-factors based 
 on F^2^ are statistically about twice as large as those based on F, and R- 
 factors based on ALL data will be even larger. 
; 
 
_refine_ls_structure_factor_coef  Fsqd  
_refine_ls_matrix_type            full 
_refine_ls_weighting_scheme       calc  
_refine_ls_weighting_details 
 'calc w=1/[\s^2^(Fo^2^)+(0.0354P)^2^+0.9266P] where P=(Fo^2^+2Fc^2^)/3' 
_atom_sites_solution_primary      direct 
_atom_sites_solution_secondary    difmap 
_atom_sites_solution_hydrogens    geom 
_refine_ls_hydrogen_treatment     constr
_refine_ls_extinction_method      none 
_refine_ls_extinction_coef        ? 
_refine_ls_number_reflns          4472 
_refine_ls_number_parameters      223 
_refine_ls_number_restraints      0 
_refine_ls_R_factor_all           0.0379 
_refine_ls_R_factor_gt            0.0329 
_refine_ls_wR_factor_ref          0.0883 
_refine_ls_wR_factor_gt           0.0847 
_refine_ls_goodness_of_fit_ref    1.112 
_refine_ls_restrained_S_all       1.112 
_refine_ls_shift/su_max           0.000 
_refine_ls_shift/su_mean          0.000 
 
loop_ 
 _atom_site_label 
 _atom_site_type_symbol 
 _atom_site_fract_x 
 _atom_site_fract_y 
 _atom_site_fract_z 
 _atom_site_U_iso_or_equiv 
 _atom_site_adp_type 
 _atom_site_occupancy 
 _atom_site_symmetry_multiplicity 
 _atom_site_calc_flag 
 _atom_site_refinement_flags 
 _atom_site_disorder_assembly 
 _atom_site_disorder_group 
Ca1 Ca 0.5000 -0.5000 0.5000 0.01471(9) Uani 1 2 d S . . 
P1 P 0.69829(3) -0.22052(4) 0.410715(14) 0.01715(9) Uani 1 1 d . . . 
O1 O 0.61318(10) -0.33550(11) 0.44674(4) 0.0210(2) Uani 1 1 d . . . 
O2 O 0.70147(9) -0.65768(11) 0.51416(5) 0.0218(2) Uani 1 1 d . . . 
O3 O 0.55720(10) -0.33640(11) 0.57936(4) 0.0224(2) Uani 1 1 d . . . 
C1 C 0.57413(14) -0.15005(15) 0.35481(6) 0.0185(3) Uani 1 1 d . . . 
C2 C 0.43644(15) -0.19826(16) 0.35406(6) 0.0225(3) Uani 1 1 d . . . 
H2A H 0.4078 -0.2724 0.3812 0.027 Uiso 1 1 calc R . . 
C3 C 0.34058(16) -0.13911(18) 0.31408(7) 0.0295(3) Uani 1 1 d . . . 
H3A H 0.2476 -0.1737 0.3139 0.035 Uiso 1 1 calc R . . 
C4 C 0.38076(18) -0.02975(19) 0.27452(7) 0.0328(4) Uani 1 1 d . . . 
H4A H 0.3159 0.0093 0.2469 0.039 Uiso 1 1 calc R . . 
C5 C 0.51555(18) 0.02201(18) 0.27552(6) 0.0309(3) Uani 1 1 d . . . 
H5A H 0.5431 0.0979 0.2488 0.037 Uiso 1 1 calc R . . 
C6 C 0.61124(16) -0.03671(17) 0.31552(6) 0.0250(3) Uani 1 1 d . . . 
H6A H 0.7033 0.0009 0.3161 0.030 Uiso 1 1 calc R . . 
C7 C 0.80170(13) -0.35063(16) 0.36582(6) 0.0184(3) Uani 1 1 d . . . 
C8 C 0.89435(15) -0.29230(18) 0.32684(7) 0.0258(3) Uani 1 1 d . . . 
H8A H 0.9015 -0.1830 0.3215 0.031 Uiso 1 1 calc R . . 
C9 C 0.97610(15) -0.3920(2) 0.29586(7) 0.0300(3) Uani 1 1 d . . . 
H9A H 1.0374 -0.3505 0.2691 0.036 Uiso 1 1 calc R . . 
C10 C 0.96842(15) -0.5515(2) 0.30388(7) 0.0290(3) Uani 1 1 d . . . 
H10A H 1.0238 -0.6196 0.2825 0.035 Uiso 1 1 calc R . . 
C11 C 0.87985(15) -0.61091(18) 0.34304(7) 0.0270(3) Uani 1 1 d . . . 
H11A H 0.8750 -0.7202 0.3489 0.032 Uiso 1 1 calc R . . 
C12 C 0.79748(14) -0.51140(16) 0.37411(6) 0.0215(3) Uani 1 1 d . . . 
H12A H 0.7377 -0.5536 0.4013 0.026 Uiso 1 1 calc R . . 
C13 C 0.84172(14) -0.60889(17) 0.52728(7) 0.0257(3) Uani 1 1 d . . . 
H13A H 0.8547 -0.5856 0.5684 0.031 Uiso 1 1 calc R . . 
H13B H 0.8646 -0.5147 0.5053 0.031 Uiso 1 1 calc R . . 
C14 C 0.93145(15) -0.74457(18) 0.51067(7) 0.0276(3) Uani 1 1 d . . . 
H14A H 1.0180 -0.7483 0.5342 0.033 Uiso 1 1 calc R . . 
H14B H 0.9540 -0.7396 0.4700 0.033 Uiso 1 1 calc R . . 
C15 C 0.83876(15) -0.88323(17) 0.52268(7) 0.0274(3) Uani 1 1 d . . . 
H15A H 0.8663 -0.9765 0.5011 0.033 Uiso 1 1 calc R . . 
H15B H 0.8399 -0.9084 0.5638 0.033 Uiso 1 1 calc R . . 
C16 C 0.69903(14) -0.82346(16) 0.50204(7) 0.0251(3) Uani 1 1 d . . . 
H16A H 0.6845 -0.8423 0.4607 0.030 Uiso 1 1 calc R . . 
H16B H 0.6244 -0.8754 0.5225 0.030 Uiso 1 1 calc R . . 
C17 C 0.64943(16) -0.20402(17) 0.57812(7) 0.0262(3) Uani 1 1 d . . . 
H17A H 0.6009 -0.1071 0.5883 0.031 Uiso 1 1 calc R . . 
H17B H 0.6874 -0.1913 0.5399 0.031 Uiso 1 1 calc R . . 
C18 C 0.76313(15) -0.24182(17) 0.62204(7) 0.0261(3) Uani 1 1 d . . . 
H18A H 0.7966 -0.1463 0.6417 0.031 Uiso 1 1 calc R . . 
H18B H 0.8417 -0.2934 0.6041 0.031 Uiso 1 1 calc R . . 
C19 C 0.69353(15) -0.35281(18) 0.66397(6) 0.0259(3) Uani 1 1 d . . . 
H19A H 0.7415 -0.4545 0.6658 0.031 Uiso 1 1 calc R . . 
H19B H 0.6932 -0.3072 0.7026 0.031 Uiso 1 1 calc R . . 
C20 C 0.54714(14) -0.37078(17) 0.63916(6) 0.0218(3) Uani 1 1 d . . . 
H20A H 0.5131 -0.4782 0.6448 0.026 Uiso 1 1 calc R . . 
H20B H 0.4838 -0.2971 0.6573 0.026 Uiso 1 1 calc R . . 
 
loop_ 
 _atom_site_aniso_label 
 _atom_site_aniso_U_11 
 _atom_site_aniso_U_22 
 _atom_site_aniso_U_33 
 _atom_site_aniso_U_23 
 _atom_site_aniso_U_13 
 _atom_site_aniso_U_12 
Ca1 0.01568(17) 0.01442(17) 0.01412(18) 0.00078(13) 0.00172(13) 0.00184(13) 
P1 0.01894(17) 0.01753(17) 0.01502(17) 0.00054(12) 0.00117(12) -0.00145(12) 
O1 0.0227(5) 0.0220(5) 0.0187(5) 0.0043(4) 0.0047(4) 0.0010(4) 
O2 0.0163(4) 0.0151(4) 0.0338(6) 0.0008(4) 0.0001(4) 0.0017(3) 
O3 0.0295(5) 0.0194(5) 0.0183(5) -0.0007(4) -0.0002(4) -0.0047(4) 
C1 0.0246(6) 0.0157(6) 0.0153(6) -0.0019(5) 0.0008(5) 0.0036(5) 
C2 0.0251(7) 0.0186(6) 0.0236(7) -0.0029(5) -0.0007(5) 0.0014(5) 
C3 0.0281(7) 0.0282(8) 0.0314(8) -0.0086(6) -0.0082(6) 0.0059(6) 
C4 0.0439(9) 0.0316(8) 0.0219(8) -0.0056(6) -0.0099(7) 0.0159(7) 
C5 0.0479(10) 0.0275(8) 0.0176(7) 0.0041(6) 0.0041(6) 0.0108(7) 
C6 0.0316(8) 0.0230(7) 0.0207(7) 0.0027(6) 0.0051(6) 0.0027(6) 
C7 0.0161(6) 0.0226(6) 0.0163(6) 0.0003(5) -0.0011(5) -0.0006(5) 
C8 0.0244(7) 0.0258(7) 0.0274(8) 0.0032(6) 0.0050(6) -0.0004(6) 
C9 0.0227(7) 0.0402(9) 0.0276(8) 0.0018(7) 0.0086(6) 0.0006(6) 
C10 0.0216(7) 0.0375(8) 0.0280(8) -0.0066(7) 0.0025(6) 0.0065(6) 
C11 0.0241(7) 0.0250(7) 0.0315(8) -0.0023(6) -0.0022(6) 0.0038(6) 
C12 0.0180(6) 0.0240(7) 0.0226(7) 0.0002(5) 0.0001(5) 0.0003(5) 
C13 0.0190(6) 0.0216(7) 0.0360(8) -0.0022(6) -0.0039(6) -0.0017(5) 
C14 0.0181(7) 0.0287(8) 0.0359(9) -0.0012(6) -0.0003(6) 0.0027(6) 
C15 0.0235(7) 0.0197(7) 0.0388(9) 0.0005(6) -0.0030(6) 0.0055(5) 
C16 0.0203(6) 0.0157(6) 0.0392(9) -0.0018(6) 0.0003(6) 0.0013(5) 
C17 0.0347(8) 0.0192(7) 0.0247(7) -0.0001(5) 0.0005(6) -0.0076(6) 
C18 0.0246(7) 0.0250(7) 0.0290(8) -0.0022(6) 0.0032(6) -0.0035(6) 
C19 0.0261(7) 0.0277(7) 0.0237(7) 0.0030(6) -0.0021(6) -0.0018(6) 
C20 0.0244(7) 0.0233(7) 0.0176(7) -0.0014(5) 0.0014(5) -0.0008(5) 
 
_geom_special_details 
; 
 All esds (except the esd in the dihedral angle between two l.s. planes) 
 are estimated using the full covariance matrix.  The cell esds are taken 
 into account individually in the estimation of esds in distances, angles 
 and torsion angles; correlations between esds in cell parameters are only 
 used when they are defined by crystal symmetry.  An approximate (isotropic) 
 treatment of cell esds is used for estimating esds involving l.s. planes. 
; 
 
loop_ 
 _geom_bond_atom_site_label_1 
 _geom_bond_atom_site_label_2 
 _geom_bond_distance 
 _geom_bond_site_symmetry_2 
 _geom_bond_publ_flag 
Ca1 O1 2.2065(9) 3_646 ? 
Ca1 O1 2.2065(9) . ? 
Ca1 O3 2.3853(10) 3_646 ? 
Ca1 O3 2.3853(10) . ? 
Ca1 O2 2.3920(9) . ? 
Ca1 O2 2.3920(9) 3_646 ? 
P1 O1 1.5573(10) . ? 
P1 C1 1.8527(14) . ? 
P1 C7 1.8563(14) . ? 
O2 C13 1.4469(16) . ? 
O2 C16 1.4522(16) . ? 
O3 C20 1.4432(16) . ? 
O3 C17 1.4480(17) . ? 
C1 C6 1.3980(19) . ? 
C1 C2 1.3985(19) . ? 
C2 C3 1.394(2) . ? 
C2 H2A 0.9500 . ? 
C3 C4 1.388(2) . ? 
C3 H3A 0.9500 . ? 
C4 C5 1.381(3) . ? 
C4 H4A 0.9500 . ? 
C5 C6 1.392(2) . ? 
C5 H5A 0.9500 . ? 
C6 H6A 0.9500 . ? 
C7 C12 1.3954(19) . ? 
C7 C8 1.3993(19) . ? 
C8 C9 1.391(2) . ? 
C8 H8A 0.9500 . ? 
C9 C10 1.386(2) . ? 
C9 H9A 0.9500 . ? 
C10 C11 1.380(2) . ? 
C10 H10A 0.9500 . ? 
C11 C12 1.395(2) . ? 
C11 H11A 0.9500 . ? 
C12 H12A 0.9500 . ? 
C13 C14 1.514(2) . ? 
C13 H13A 0.9900 . ? 
C13 H13B 0.9900 . ? 
C14 C15 1.525(2) . ? 
C14 H14A 0.9900 . ? 
C14 H14B 0.9900 . ? 
C15 C16 1.5135(19) . ? 
C15 H15A 0.9900 . ? 
C15 H15B 0.9900 . ? 
C16 H16A 0.9900 . ? 
C16 H16B 0.9900 . ? 
C17 C18 1.519(2) . ? 
C17 H17A 0.9900 . ? 
C17 H17B 0.9900 . ? 
C18 C19 1.544(2) . ? 
C18 H18A 0.9900 . ? 
C18 H18B 0.9900 . ? 
C19 C20 1.524(2) . ? 
C19 H19A 0.9900 . ? 
C19 H19B 0.9900 . ? 
C20 H20A 0.9900 . ? 
C20 H20B 0.9900 . ? 
 
loop_ 
 _geom_angle_atom_site_label_1 
 _geom_angle_atom_site_label_2 
 _geom_angle_atom_site_label_3 
 _geom_angle 
 _geom_angle_site_symmetry_1 
 _geom_angle_site_symmetry_3 
 _geom_angle_publ_flag 
O1 Ca1 O1 180.0 3_646 . ? 
O1 Ca1 O3 87.71(4) 3_646 3_646 ? 
O1 Ca1 O3 92.29(3) . 3_646 ? 
O1 Ca1 O3 92.29(3) 3_646 . ? 
O1 Ca1 O3 87.71(4) . . ? 
O3 Ca1 O3 180.0 3_646 . ? 
O1 Ca1 O2 88.82(3) 3_646 . ? 
O1 Ca1 O2 91.18(3) . . ? 
O3 Ca1 O2 86.65(3) 3_646 . ? 
O3 Ca1 O2 93.35(3) . . ? 
O1 Ca1 O2 91.18(3) 3_646 3_646 ? 
O1 Ca1 O2 88.82(3) . 3_646 ? 
O3 Ca1 O2 93.35(3) 3_646 3_646 ? 
O3 Ca1 O2 86.65(3) . 3_646 ? 
O2 Ca1 O2 180.00(5) . 3_646 ? 
O1 P1 C1 104.41(6) . . ? 
O1 P1 C7 103.63(6) . . ? 
C1 P1 C7 98.30(6) . . ? 
P1 O1 Ca1 177.71(6) . . ? 
C13 O2 C16 109.54(10) . . ? 
C13 O2 Ca1 128.59(8) . . ? 
C16 O2 Ca1 121.36(8) . . ? 
C20 O3 C17 104.11(10) . . ? 
C20 O3 Ca1 128.27(8) . . ? 
C17 O3 Ca1 124.99(8) . . ? 
C6 C1 C2 117.81(13) . . ? 
C6 C1 P1 121.32(11) . . ? 
C2 C1 P1 120.60(10) . . ? 
C3 C2 C1 120.98(14) . . ? 
C3 C2 H2A 119.5 . . ? 
C1 C2 H2A 119.5 . . ? 
C4 C3 C2 120.11(15) . . ? 
C4 C3 H3A 119.9 . . ? 
C2 C3 H3A 119.9 . . ? 
C5 C4 C3 119.68(14) . . ? 
C5 C4 H4A 120.2 . . ? 
C3 C4 H4A 120.2 . . ? 
C4 C5 C6 120.23(15) . . ? 
C4 C5 H5A 119.9 . . ? 
C6 C5 H5A 119.9 . . ? 
C5 C6 C1 121.14(14) . . ? 
C5 C6 H6A 119.4 . . ? 
C1 C6 H6A 119.4 . . ? 
C12 C7 C8 117.94(13) . . ? 
C12 C7 P1 119.81(10) . . ? 
C8 C7 P1 122.00(11) . . ? 
C9 C8 C7 120.97(14) . . ? 
C9 C8 H8A 119.5 . . ? 
C7 C8 H8A 119.5 . . ? 
C10 C9 C8 120.19(14) . . ? 
C10 C9 H9A 119.9 . . ? 
C8 C9 H9A 119.9 . . ? 
C11 C10 C9 119.64(14) . . ? 
C11 C10 H10A 120.2 . . ? 
C9 C10 H10A 120.2 . . ? 
C10 C11 C12 120.35(15) . . ? 
C10 C11 H11A 119.8 . . ? 
C12 C11 H11A 119.8 . . ? 
C11 C12 C7 120.86(14) . . ? 
C11 C12 H12A 119.6 . . ? 
C7 C12 H12A 119.6 . . ? 
O2 C13 C14 105.51(11) . . ? 
O2 C13 H13A 110.6 . . ? 
C14 C13 H13A 110.6 . . ? 
O2 C13 H13B 110.6 . . ? 
C14 C13 H13B 110.6 . . ? 
H13A C13 H13B 108.8 . . ? 
C13 C14 C15 101.82(12) . . ? 
C13 C14 H14A 111.4 . . ? 
C15 C14 H14A 111.4 . . ? 
C13 C14 H14B 111.4 . . ? 
C15 C14 H14B 111.4 . . ? 
H14A C14 H14B 109.3 . . ? 
C16 C15 C14 101.74(11) . . ? 
C16 C15 H15A 111.4 . . ? 
C14 C15 H15A 111.4 . . ? 
C16 C15 H15B 111.4 . . ? 
C14 C15 H15B 111.4 . . ? 
H15A C15 H15B 109.3 . . ? 
O2 C16 C15 105.16(11) . . ? 
O2 C16 H16A 110.7 . . ? 
C15 C16 H16A 110.7 . . ? 
O2 C16 H16B 110.7 . . ? 
C15 C16 H16B 110.7 . . ? 
H16A C16 H16B 108.8 . . ? 
O3 C17 C18 104.65(11) . . ? 
O3 C17 H17A 110.8 . . ? 
C18 C17 H17A 110.8 . . ? 
O3 C17 H17B 110.8 . . ? 
C18 C17 H17B 110.8 . . ? 
H17A C17 H17B 108.9 . . ? 
C17 C18 C19 104.01(12) . . ? 
C17 C18 H18A 111.0 . . ? 
C19 C18 H18A 111.0 . . ? 
C17 C18 H18B 111.0 . . ? 
C19 C18 H18B 111.0 . . ? 
H18A C18 H18B 109.0 . . ? 
C20 C19 C18 103.96(12) . . ? 
C20 C19 H19A 111.0 . . ? 
C18 C19 H19A 111.0 . . ? 
C20 C19 H19B 111.0 . . ? 
C18 C19 H19B 111.0 . . ? 
H19A C19 H19B 109.0 . . ? 
O3 C20 C19 104.91(11) . . ? 
O3 C20 H20A 110.8 . . ? 
C19 C20 H20A 110.8 . . ? 
O3 C20 H20B 110.8 . . ? 
C19 C20 H20B 110.8 . . ? 
H20A C20 H20B 108.8 . . ? 
 
_diffrn_measured_fraction_theta_max    0.995 
_diffrn_reflns_theta_full              27.47 
_diffrn_measured_fraction_theta_full   0.995 
_refine_diff_density_max    0.298 
_refine_diff_density_min   -0.293 
_refine_diff_density_rms    0.057 
 

#=== END

data_FO3449 
 
_audit_creation_method            SHELXL-97 
_chemical_name_systematic 
? 
_chemical_name_common             ? 
_chemical_melting_point           ? 
_chemical_formula_moiety          'C28 H32 Ca O6 P2 S2'
_chemical_formula_sum             'C28 H32 Ca O6 P2 S2' 
_chemical_formula_weight          630.68 
 
loop_ 
 _atom_type_symbol 
 _atom_type_description 
 _atom_type_scat_dispersion_real 
 _atom_type_scat_dispersion_imag 
 _atom_type_scat_source 
 'C'  'C'   0.0033   0.0016 
 'International Tables Vol C Tables 4.2.6.8 and 6.1.1.4' 
 'H'  'H'   0.0000   0.0000 
 'International Tables Vol C Tables 4.2.6.8 and 6.1.1.4' 
 'O'  'O'   0.0106   0.0060 
 'International Tables Vol C Tables 4.2.6.8 and 6.1.1.4' 
 'P'  'P'   0.1023   0.0942 
 'International Tables Vol C Tables 4.2.6.8 and 6.1.1.4' 
 'S'  'S'   0.1246   0.1234 
 'International Tables Vol C Tables 4.2.6.8 and 6.1.1.4' 
 'Ca'  'Ca'   0.2262   0.3064 
 'International Tables Vol C Tables 4.2.6.8 and 6.1.1.4' 
 
_symmetry_cell_setting            triclinic 
_symmetry_space_group_name_H-M    'P -1'
_symmetry_space_group_name_Hall   '-P 1'
 
loop_ 
 _symmetry_equiv_pos_as_xyz 
 'x, y, z' 
 '-x, -y, -z' 
 
_cell_length_a                    5.7704(2) 
_cell_length_b                    15.4651(8) 
_cell_length_c                    16.8331(6) 
_cell_angle_alpha                 89.439(3) 
_cell_angle_beta                  88.309(3) 
_cell_angle_gamma                 83.633(2) 
_cell_volume                      1492.23(11) 
_cell_formula_units_Z             2 
_cell_measurement_temperature     183(2) 
_cell_measurement_reflns_used     11416 
_cell_measurement_theta_min       1.21
_cell_measurement_theta_max       27.45
 
_exptl_crystal_description        prism 
_exptl_crystal_colour             colourless 
_exptl_crystal_size_max           0.05 
_exptl_crystal_size_mid           0.05 
_exptl_crystal_size_min           0.05 
_exptl_crystal_density_meas       ? 
_exptl_crystal_density_diffrn     1.404 
_exptl_crystal_density_method     'not measured' 
_exptl_crystal_F_000              660 
_exptl_absorpt_coefficient_mu     0.497 
_exptl_absorpt_correction_type    none 
_exptl_absorpt_correction_T_min   ?
_exptl_absorpt_correction_T_max   ?
_exptl_absorpt_process_details    ? 
 
_exptl_special_details 
? 
 
_diffrn_ambient_temperature       183(2) 
_diffrn_radiation_wavelength      0.71073 
_diffrn_radiation_type            MoK\a 
_diffrn_radiation_source          'fine-focus sealed tube' 
_diffrn_radiation_monochromator   graphite 
_diffrn_measurement_device_type   KappaCCD 
_diffrn_measurement_method        'phi- + omega-scan'
_diffrn_detector_area_resol_mean  ? 
_diffrn_standards_number          ? 
_diffrn_standards_interval_count  ? 
_diffrn_standards_interval_time   ? 
_diffrn_standards_decay_%         ? 
_diffrn_reflns_number             11416 
_diffrn_reflns_av_R_equivalents   0.0541 
_diffrn_reflns_av_sigmaI/netI     0.1028 
_diffrn_reflns_limit_h_min        -7 
_diffrn_reflns_limit_h_max        6 
_diffrn_reflns_limit_k_min        -18 
_diffrn_reflns_limit_k_max        20 
_diffrn_reflns_limit_l_min        -20 
_diffrn_reflns_limit_l_max        21 
_diffrn_reflns_theta_min          1.21 
_diffrn_reflns_theta_max          27.45 
_reflns_number_total              6791 
_reflns_number_gt                 4328 
_reflns_threshold_expression      >2sigma(I) 
 
_computing_data_collection        COLLECT 
_computing_cell_refinement        DENZO
_computing_data_reduction         DENZO
_computing_structure_solution     'SHELXS-97 (Sheldrick, 1990)' 
_computing_structure_refinement   'SHELXL-97 (Sheldrick, 1997)' 
_computing_molecular_graphics     SHELXTL/PC
_computing_publication_material   SHELXL-97
 
_refine_special_details 
; 
 Refinement of F^2^ against ALL reflections.  The weighted R-factor wR and 
 goodness of fit S are based on F^2^, conventional R-factors R are based 
 on F, with F set to zero for negative F^2^. The threshold expression of 
 F^2^ > 2sigma(F^2^) is used only for calculating R-factors(gt) etc. and is 
 not relevant to the choice of reflections for refinement.  R-factors based 
 on F^2^ are statistically about twice as large as those based on F, and R- 
 factors based on ALL data will be even larger. 
; 
 
_refine_ls_structure_factor_coef  Fsqd  
_refine_ls_matrix_type            full 
_refine_ls_weighting_scheme       calc  
_refine_ls_weighting_details 
 'calc w=1/[\s^2^(Fo^2^)+(0.0655P)^2^+0.7896P] where P=(Fo^2^+2Fc^2^)/3' 
_atom_sites_solution_primary      direct 
_atom_sites_solution_secondary    difmap 
_atom_sites_solution_hydrogens    geom 
_refine_ls_hydrogen_treatment     constr
_refine_ls_extinction_method      none 
_refine_ls_extinction_coef        ? 
_refine_ls_number_reflns          6791 
_refine_ls_number_parameters      367 
_refine_ls_number_restraints      0 
_refine_ls_R_factor_all           0.1071 
_refine_ls_R_factor_gt            0.0535 
_refine_ls_wR_factor_ref          0.1333 
_refine_ls_wR_factor_gt           0.1137 
_refine_ls_goodness_of_fit_ref    0.894 
_refine_ls_restrained_S_all       0.894 
_refine_ls_shift/su_max           0.000 
_refine_ls_shift/su_mean          0.000 
 
loop_ 
 _atom_site_label 
 _atom_site_type_symbol 
 _atom_site_fract_x 
 _atom_site_fract_y 
 _atom_site_fract_z 
 _atom_site_U_iso_or_equiv 
 _atom_site_adp_type 
 _atom_site_occupancy 
 _atom_site_symmetry_multiplicity 
 _atom_site_calc_flag 
 _atom_site_refinement_flags 
 _atom_site_disorder_assembly 
 _atom_site_disorder_group 
Ca1A Ca 0.5000 0.0000 0.5000 0.01305(19) Uani 1 2 d S . . 
S1 S 0.6486(3) -0.08803(13) 0.68462(11) 0.0241(6) Uani 0.426(3) 1 d P A 1 
S1A S 0.6682(3) -0.16473(10) 0.63937(9) 0.0266(5) Uani 0.574(3) 1 d P A 2 
P1A P -0.03996(13) 0.12130(5) 0.58622(5) 0.01895(19) Uani 1 1 d . . . 
O1A O 0.1945(4) 0.09675(16) 0.54756(13) 0.0279(5) Uani 1 1 d . A . 
O2A O -0.2392(4) 0.07183(15) 0.56747(14) 0.0280(5) Uani 1 1 d . . . 
O3A O 0.4919(4) -0.09159(16) 0.61279(13) 0.0270(5) Uani 1 1 d . A . 
C1A C -0.0024(5) 0.1194(2) 0.69306(18) 0.0214(7) Uani 1 1 d . A . 
C2A C 0.2101(6) 0.0917(3) 0.7259(2) 0.0390(10) Uani 1 1 d . . . 
H2AA H 0.3391 0.0713 0.6921 0.047 Uiso 1 1 calc R A . 
C3A C 0.2375(7) 0.0932(3) 0.8075(2) 0.0468(11) Uani 1 1 d . A . 
H3AA H 0.3844 0.0735 0.8291 0.056 Uiso 1 1 calc R . . 
C4A C 0.0534(7) 0.1231(3) 0.8571(2) 0.0353(9) Uani 1 1 d . . . 
H4AA H 0.0731 0.1248 0.9129 0.042 Uiso 1 1 calc R A . 
C5A C -0.1588(7) 0.1503(3) 0.8256(2) 0.0443(10) Uani 1 1 d . A . 
H5AA H -0.2870 0.1707 0.8598 0.053 Uiso 1 1 calc R . . 
C6A C -0.1871(6) 0.1483(3) 0.7447(2) 0.0348(9) Uani 1 1 d . . . 
H6AA H -0.3356 0.1670 0.7237 0.042 Uiso 1 1 calc R A . 
C7A C -0.1291(5) 0.2355(2) 0.56562(17) 0.0181(6) Uani 1 1 d . A . 
C8A C -0.3442(5) 0.2626(2) 0.53188(19) 0.0262(7) Uani 1 1 d . . . 
H8AA H -0.4446 0.2209 0.5177 0.031 Uiso 1 1 calc R A . 
C9A C -0.4105(6) 0.3507(2) 0.5193(2) 0.0308(8) Uani 1 1 d . A . 
H9AA H -0.5562 0.3689 0.4962 0.037 Uiso 1 1 calc R . . 
C10A C -0.2668(6) 0.4121(2) 0.5399(2) 0.0306(8) Uani 1 1 d . . . 
H10A H -0.3144 0.4722 0.5314 0.037 Uiso 1 1 calc R A . 
C11A C -0.0543(6) 0.3861(2) 0.5728(2) 0.0306(8) Uani 1 1 d . A . 
H11A H 0.0449 0.4281 0.5873 0.037 Uiso 1 1 calc R . . 
C12A C 0.0138(6) 0.2981(2) 0.58460(19) 0.0255(7) Uani 1 1 d . . . 
H12A H 0.1619 0.2804 0.6062 0.031 Uiso 1 1 calc R A . 
C13A C 0.9334(6) -0.1238(3) 0.6529(2) 0.0435(10) Uani 1 1 d . . . 
H13A H 1.0183 -0.1528 0.6971 0.065 Uiso 0.426(3) 1 calc PR A 1 
H13B H 1.0119 -0.0739 0.6347 0.065 Uiso 0.426(3) 1 calc PR A 1 
H13C H 0.9299 -0.1648 0.6090 0.065 Uiso 0.426(3) 1 calc PR A 1 
H13D H 1.0134 -0.1544 0.6973 0.065 Uiso 0.574(3) 1 calc PR A 2 
H13E H 0.9052 -0.0615 0.6646 0.065 Uiso 0.574(3) 1 calc PR A 2 
H13F H 1.0309 -0.1325 0.6043 0.065 Uiso 0.574(3) 1 calc PR A 2 
C14A C 0.5899(7) -0.1810(3) 0.7420(2) 0.0430(10) Uani 1 1 d . . . 
H14A H 0.6701 -0.1810 0.7925 0.064 Uiso 0.426(3) 1 calc PR A 1 
H14B H 0.6458 -0.2340 0.7126 0.064 Uiso 0.426(3) 1 calc PR A 1 
H14C H 0.4215 -0.1792 0.7525 0.064 Uiso 0.426(3) 1 calc PR A 1 
H14D H 0.7249 -0.1754 0.7748 0.064 Uiso 0.574(3) 1 calc PR A 2 
H14E H 0.5404 -0.2392 0.7492 0.064 Uiso 0.574(3) 1 calc PR A 2 
H14F H 0.4616 -0.1372 0.7581 0.064 Uiso 0.574(3) 1 calc PR A 2 
Ca1B Ca 0.5000 0.5000 0.0000 0.01344(19) Uani 1 2 d S . . 
S1B S 0.59544(15) 0.64396(6) 0.15905(5) 0.0301(2) Uani 1 1 d . . . 
P1B P 1.01785(13) 0.37031(5) 0.07338(4) 0.01637(18) Uani 1 1 d . . . 
O1B O 0.7735(3) 0.38651(14) 0.04447(12) 0.0217(5) Uani 1 1 d . . . 
O2B O 1.2046(3) 0.41982(14) 0.03745(12) 0.0217(5) Uani 1 1 d . . . 
O3B O 0.5128(4) 0.56347(17) 0.12635(12) 0.0310(6) Uani 1 1 d . . . 
C1B C 1.0151(5) 0.3842(2) 0.18046(18) 0.0198(6) Uani 1 1 d . . . 
C2B C 0.8303(6) 0.3581(2) 0.22787(19) 0.0284(8) Uani 1 1 d . . . 
H2BA H 0.6997 0.3380 0.2037 0.034 Uiso 1 1 calc R . . 
C3B C 0.8388(6) 0.3617(3) 0.3097(2) 0.0374(9) Uani 1 1 d . . . 
H3BA H 0.7149 0.3430 0.3416 0.045 Uiso 1 1 calc R . . 
C4B C 1.0264(7) 0.3921(3) 0.3454(2) 0.0371(9) Uani 1 1 d . . . 
H4BA H 1.0316 0.3940 0.4017 0.044 Uiso 1 1 calc R . . 
C5B C 1.2057(6) 0.4198(2) 0.2995(2) 0.0345(8) Uani 1 1 d . . . 
H5BA H 1.3332 0.4417 0.3240 0.041 Uiso 1 1 calc R . . 
C6B C 1.1998(6) 0.4156(2) 0.21715(19) 0.0264(7) Uani 1 1 d . . . 
H6BA H 1.3242 0.4346 0.1857 0.032 Uiso 1 1 calc R . . 
C7B C 1.1159(5) 0.2551(2) 0.06431(16) 0.0167(6) Uani 1 1 d . . . 
C8B C 1.3446(5) 0.2262(2) 0.03838(18) 0.0235(7) Uani 1 1 d . . . 
H8BA H 1.4478 0.2671 0.0219 0.028 Uiso 1 1 calc R . . 
C9B C 1.4201(6) 0.1376(2) 0.0369(2) 0.0296(8) Uani 1 1 d . . . 
H9BA H 1.5739 0.1185 0.0181 0.036 Uiso 1 1 calc R . . 
C10B C 1.2748(6) 0.0771(2) 0.0624(2) 0.0314(8) Uani 1 1 d . . . 
H10B H 1.3297 0.0169 0.0621 0.038 Uiso 1 1 calc R . . 
C11B C 1.0480(6) 0.1046(2) 0.0883(2) 0.0292(8) Uani 1 1 d . . . 
H11B H 0.9473 0.0634 0.1061 0.035 Uiso 1 1 calc R . . 
C12B C 0.9699(6) 0.1927(2) 0.08813(19) 0.0242(7) Uani 1 1 d . . . 
H12B H 0.8134 0.2111 0.1046 0.029 Uiso 1 1 calc R . . 
C13B C 0.9044(6) 0.6279(3) 0.1585(2) 0.0398(9) Uani 1 1 d . . . 
H13G H 0.9646 0.6190 0.1038 0.060 Uiso 1 1 calc R . . 
H13H H 0.9553 0.5765 0.1907 0.060 Uiso 1 1 calc R . . 
H13I H 0.9641 0.6791 0.1807 0.060 Uiso 1 1 calc R . . 
C14B C 0.5454(8) 0.6352(4) 0.2631(2) 0.0624(15) Uani 1 1 d . . . 
H14G H 0.3772 0.6387 0.2748 0.094 Uiso 1 1 calc R . . 
H14H H 0.6102 0.6827 0.2898 0.094 Uiso 1 1 calc R . . 
H14I H 0.6210 0.5793 0.2822 0.094 Uiso 1 1 calc R . . 
 
loop_ 
 _atom_site_aniso_label 
 _atom_site_aniso_U_11 
 _atom_site_aniso_U_22 
 _atom_site_aniso_U_33 
 _atom_site_aniso_U_23 
 _atom_site_aniso_U_13 
 _atom_site_aniso_U_12 
Ca1A 0.0101(4) 0.0148(5) 0.0142(4) -0.0004(3) -0.0020(3) -0.0003(3) 
S1 0.0243(10) 0.0248(12) 0.0235(10) 0.0061(8) -0.0056(7) -0.0032(8) 
S1A 0.0283(8) 0.0215(9) 0.0297(8) 0.0046(6) -0.0099(6) 0.0013(6) 
P1A 0.0132(4) 0.0186(5) 0.0248(4) -0.0080(3) -0.0048(3) 0.0011(3) 
O1A 0.0190(11) 0.0325(15) 0.0301(12) -0.0124(10) -0.0014(9) 0.0070(10) 
O2A 0.0200(12) 0.0221(13) 0.0426(14) -0.0076(10) -0.0139(10) -0.0018(10) 
O3A 0.0199(11) 0.0325(15) 0.0286(12) 0.0138(10) -0.0054(9) -0.0027(10) 
C1A 0.0223(16) 0.0147(17) 0.0279(17) -0.0029(13) -0.0050(13) -0.0041(13) 
C2A 0.0239(18) 0.061(3) 0.0313(19) -0.0105(18) -0.0095(15) 0.0043(18) 
C3A 0.035(2) 0.069(3) 0.036(2) -0.003(2) -0.0159(17) 0.001(2) 
C4A 0.048(2) 0.036(2) 0.0241(18) -0.0013(15) -0.0046(16) -0.0138(18) 
C5A 0.050(2) 0.048(3) 0.031(2) 0.0073(18) 0.0114(18) 0.006(2) 
C6A 0.0237(18) 0.048(3) 0.0296(18) 0.0061(16) 0.0000(14) 0.0094(16) 
C7A 0.0148(14) 0.0199(17) 0.0188(15) -0.0031(12) 0.0032(11) 0.0013(12) 
C8A 0.0216(16) 0.026(2) 0.0303(17) -0.0046(14) -0.0026(13) 0.0005(14) 
C9A 0.0274(18) 0.029(2) 0.0341(19) 0.0029(15) 0.0003(14) 0.0035(15) 
C10A 0.0347(19) 0.022(2) 0.0332(19) 0.0021(15) 0.0025(15) 0.0024(15) 
C11A 0.0314(19) 0.023(2) 0.039(2) -0.0024(15) 0.0001(15) -0.0096(15) 
C12A 0.0201(16) 0.028(2) 0.0284(17) -0.0047(14) -0.0018(13) -0.0012(14) 
C13A 0.0251(19) 0.053(3) 0.051(2) 0.017(2) -0.0099(17) 0.0017(18) 
C14A 0.043(2) 0.056(3) 0.031(2) 0.0241(18) -0.0091(17) -0.013(2) 
Ca1B 0.0114(4) 0.0145(5) 0.0144(4) 0.0019(3) -0.0012(3) -0.0013(3) 
S1B 0.0309(5) 0.0258(5) 0.0335(5) -0.0050(4) -0.0086(4) -0.0008(4) 
P1B 0.0120(4) 0.0149(4) 0.0220(4) 0.0048(3) -0.0018(3) -0.0007(3) 
O1B 0.0134(10) 0.0206(13) 0.0313(12) 0.0075(9) -0.0053(9) -0.0022(9) 
O2B 0.0152(10) 0.0213(13) 0.0293(12) 0.0087(9) -0.0018(9) -0.0053(9) 
O3B 0.0340(13) 0.0405(16) 0.0214(11) -0.0101(10) 0.0014(10) -0.0163(11) 
C1B 0.0166(15) 0.0146(17) 0.0274(16) 0.0041(13) -0.0012(12) 0.0011(12) 
C2B 0.0250(17) 0.033(2) 0.0279(17) 0.0008(15) 0.0039(14) -0.0056(15) 
C3B 0.033(2) 0.042(2) 0.035(2) 0.0057(17) 0.0107(16) -0.0008(17) 
C4B 0.046(2) 0.037(2) 0.0251(18) -0.0047(16) -0.0035(16) 0.0100(18) 
C5B 0.037(2) 0.033(2) 0.0333(19) -0.0055(16) -0.0054(16) -0.0017(17) 
C6B 0.0270(17) 0.0234(19) 0.0291(18) 0.0003(14) -0.0012(14) -0.0038(14) 
C7B 0.0190(15) 0.0149(16) 0.0163(14) 0.0012(11) -0.0044(11) -0.0016(12) 
C8B 0.0227(16) 0.0208(18) 0.0269(16) -0.0017(13) -0.0015(13) -0.0009(14) 
C9B 0.0225(17) 0.029(2) 0.0356(19) -0.0070(15) -0.0038(14) 0.0066(15) 
C10B 0.038(2) 0.0163(19) 0.0387(19) -0.0036(15) -0.0133(16) 0.0080(15) 
C11B 0.036(2) 0.0174(18) 0.0358(19) 0.0031(14) -0.0045(15) -0.0080(15) 
C12B 0.0231(16) 0.0198(18) 0.0305(17) 0.0026(14) -0.0018(13) -0.0053(14) 
C13B 0.033(2) 0.041(3) 0.047(2) -0.0024(18) -0.0070(17) -0.0095(18) 
C14B 0.054(3) 0.102(4) 0.033(2) -0.035(2) 0.001(2) -0.015(3) 
 
_geom_special_details 
; 
 All esds (except the esd in the dihedral angle between two l.s. planes) 
 are estimated using the full covariance matrix.  The cell esds are taken 
 into account individually in the estimation of esds in distances, angles 
 and torsion angles; correlations between esds in cell parameters are only 
 used when they are defined by crystal symmetry.  An approximate (isotropic) 
 treatment of cell esds is used for estimating esds involving l.s. planes. 
; 
 
loop_ 
 _geom_bond_atom_site_label_1 
 _geom_bond_atom_site_label_2 
 _geom_bond_distance 
 _geom_bond_site_symmetry_2 
 _geom_bond_publ_flag 
Ca1A O2A 2.299(2) 2_556 ? 
Ca1A O2A 2.299(2) 1_655 ? 
Ca1A O1A 2.311(2) . ? 
Ca1A O1A 2.311(2) 2_656 ? 
Ca1A O3A 2.360(2) 2_656 ? 
Ca1A O3A 2.360(2) . ? 
Ca1A S1 3.4731(18) 2_656 ? 
Ca1A S1 3.4731(18) . ? 
S1 O3A 1.536(3) . ? 
S1 C13A 1.745(4) . ? 
S1 C14A 1.782(4) . ? 
S1A O3A 1.509(3) . ? 
S1A C13A 1.741(4) . ? 
S1A C14A 1.795(4) . ? 
P1A O2A 1.493(2) . ? 
P1A O1A 1.496(2) . ? 
P1A C7A 1.816(3) . ? 
P1A C1A 1.817(3) . ? 
O2A Ca1A 2.299(2) 1_455 ? 
C1A C2A 1.382(5) . ? 
C1A C6A 1.393(4) . ? 
C2A C3A 1.389(5) . ? 
C2A H2AA 0.9500 . ? 
C3A C4A 1.373(5) . ? 
C3A H3AA 0.9500 . ? 
C4A C5A 1.370(5) . ? 
C4A H4AA 0.9500 . ? 
C5A C6A 1.379(5) . ? 
C5A H5AA 0.9500 . ? 
C6A H6AA 0.9500 . ? 
C7A C12A 1.385(4) . ? 
C7A C8A 1.401(4) . ? 
C8A C9A 1.390(5) . ? 
C8A H8AA 0.9500 . ? 
C9A C10A 1.381(5) . ? 
C9A H9AA 0.9500 . ? 
C10A C11A 1.378(5) . ? 
C10A H10A 0.9500 . ? 
C11A C12A 1.388(5) . ? 
C11A H11A 0.9500 . ? 
C12A H12A 0.9500 . ? 
C13A H13A 0.9800 . ? 
C13A H13B 0.9800 . ? 
C13A H13C 0.9800 . ? 
C13A H13D 0.9800 . ? 
C13A H13E 0.9800 . ? 
C13A H13F 0.9800 . ? 
C14A H14A 0.9800 . ? 
C14A H14B 0.9800 . ? 
C14A H14C 0.9800 . ? 
C14A H14D 0.9800 . ? 
C14A H14E 0.9800 . ? 
C14A H14F 0.9800 . ? 
Ca1B O2B 2.2871(19) 2_765 ? 
Ca1B O2B 2.2871(19) 1_455 ? 
Ca1B O3B 2.358(2) 2_665 ? 
Ca1B O3B 2.358(2) . ? 
Ca1B O1B 2.358(2) 2_665 ? 
Ca1B O1B 2.358(2) . ? 
S1B O3B 1.497(2) . ? 
S1B C14B 1.773(4) . ? 
S1B C13B 1.772(4) . ? 
P1B O2B 1.500(2) . ? 
P1B O1B 1.499(2) . ? 
P1B C1B 1.817(3) . ? 
P1B C7B 1.816(3) . ? 
O2B Ca1B 2.2871(19) 1_655 ? 
C1B C6B 1.383(4) . ? 
C1B C2B 1.405(4) . ? 
C2B C3B 1.382(5) . ? 
C2B H2BA 0.9500 . ? 
C3B C4B 1.383(5) . ? 
C3B H3BA 0.9500 . ? 
C4B C5B 1.377(5) . ? 
C4B H4BA 0.9500 . ? 
C5B C6B 1.389(5) . ? 
C5B H5BA 0.9500 . ? 
C6B H6BA 0.9500 . ? 
C7B C8B 1.404(4) . ? 
C7B C12B 1.398(4) . ? 
C8B C9B 1.390(5) . ? 
C8B H8BA 0.9500 . ? 
C9B C10B 1.381(5) . ? 
C9B H9BA 0.9500 . ? 
C10B C11B 1.389(5) . ? 
C10B H10B 0.9500 . ? 
C11B C12B 1.387(5) . ? 
C11B H11B 0.9500 . ? 
C12B H12B 0.9500 . ? 
C13B H13G 0.9800 . ? 
C13B H13H 0.9800 . ? 
C13B H13I 0.9800 . ? 
C14B H14G 0.9800 . ? 
C14B H14H 0.9800 . ? 
C14B H14I 0.9800 . ? 
 
loop_ 
 _geom_angle_atom_site_label_1 
 _geom_angle_atom_site_label_2 
 _geom_angle_atom_site_label_3 
 _geom_angle 
 _geom_angle_site_symmetry_1 
 _geom_angle_site_symmetry_3 
 _geom_angle_publ_flag 
O2A Ca1A O2A 180.0 2_556 1_655 ? 
O2A Ca1A O1A 89.49(8) 2_556 . ? 
O2A Ca1A O1A 90.51(8) 1_655 . ? 
O2A Ca1A O1A 90.51(8) 2_556 2_656 ? 
O2A Ca1A O1A 89.49(8) 1_655 2_656 ? 
O1A Ca1A O1A 180.00(10) . 2_656 ? 
O2A Ca1A O3A 86.22(8) 2_556 2_656 ? 
O2A Ca1A O3A 93.78(8) 1_655 2_656 ? 
O1A Ca1A O3A 86.52(8) . 2_656 ? 
O1A Ca1A O3A 93.48(8) 2_656 2_656 ? 
O2A Ca1A O3A 93.78(8) 2_556 . ? 
O2A Ca1A O3A 86.22(8) 1_655 . ? 
O1A Ca1A O3A 93.48(8) . . ? 
O1A Ca1A O3A 86.52(8) 2_656 . ? 
O3A Ca1A O3A 180.0 2_656 . ? 
O2A Ca1A S1 65.02(7) 2_556 2_656 ? 
O2A Ca1A S1 114.98(7) 1_655 2_656 ? 
O1A Ca1A S1 84.58(7) . 2_656 ? 
O1A Ca1A S1 95.42(7) 2_656 2_656 ? 
O3A Ca1A S1 21.31(6) 2_656 2_656 ? 
O3A Ca1A S1 158.69(6) . 2_656 ? 
O2A Ca1A S1 114.98(7) 2_556 . ? 
O2A Ca1A S1 65.02(7) 1_655 . ? 
O1A Ca1A S1 95.42(7) . . ? 
O1A Ca1A S1 84.58(7) 2_656 . ? 
O3A Ca1A S1 158.69(6) 2_656 . ? 
O3A Ca1A S1 21.31(6) . . ? 
S1 Ca1A S1 180.0 2_656 . ? 
O3A S1 C13A 107.39(19) . . ? 
O3A S1 C14A 103.39(18) . . ? 
C13A S1 C14A 98.6(2) . . ? 
O3A S1 Ca1A 33.94(9) . . ? 
C13A S1 Ca1A 93.10(14) . . ? 
C14A S1 Ca1A 136.91(16) . . ? 
O3A S1A C13A 108.86(18) . . ? 
O3A S1A C14A 103.93(18) . . ? 
C13A S1A C14A 98.2(2) . . ? 
O2A P1A O1A 119.83(13) . . ? 
O2A P1A C7A 107.56(14) . . ? 
O1A P1A C7A 108.63(14) . . ? 
O2A P1A C1A 109.05(14) . . ? 
O1A P1A C1A 107.51(14) . . ? 
C7A P1A C1A 102.99(14) . . ? 
P1A O1A Ca1A 154.57(16) . . ? 
P1A O2A Ca1A 162.48(15) . 1_455 ? 
S1A O3A S1 55.08(12) . . ? 
S1A O3A Ca1A 129.81(13) . . ? 
S1 O3A Ca1A 124.75(14) . . ? 
C2A C1A C6A 117.7(3) . . ? 
C2A C1A P1A 121.7(2) . . ? 
C6A C1A P1A 120.6(2) . . ? 
C1A C2A C3A 120.9(3) . . ? 
C1A C2A H2AA 119.6 . . ? 
C3A C2A H2AA 119.6 . . ? 
C4A C3A C2A 120.3(4) . . ? 
C4A C3A H3AA 119.8 . . ? 
C2A C3A H3AA 119.8 . . ? 
C5A C4A C3A 119.6(3) . . ? 
C5A C4A H4AA 120.2 . . ? 
C3A C4A H4AA 120.2 . . ? 
C6A C5A C4A 120.2(3) . . ? 
C6A C5A H5AA 119.9 . . ? 
C4A C5A H5AA 119.9 . . ? 
C5A C6A C1A 121.3(3) . . ? 
C5A C6A H6AA 119.4 . . ? 
C1A C6A H6AA 119.4 . . ? 
C12A C7A C8A 118.4(3) . . ? 
C12A C7A P1A 120.3(2) . . ? 
C8A C7A P1A 121.2(2) . . ? 
C9A C8A C7A 119.8(3) . . ? 
C9A C8A H8AA 120.1 . . ? 
C7A C8A H8AA 120.1 . . ? 
C10A C9A C8A 120.7(3) . . ? 
C10A C9A H9AA 119.6 . . ? 
C8A C9A H9AA 119.6 . . ? 
C9A C10A C11A 119.9(3) . . ? 
C9A C10A H10A 120.0 . . ? 
C11A C10A H10A 120.0 . . ? 
C10A C11A C12A 119.5(3) . . ? 
C10A C11A H11A 120.2 . . ? 
C12A C11A H11A 120.2 . . ? 
C11A C12A C7A 121.6(3) . . ? 
C11A C12A H12A 119.2 . . ? 
C7A C12A H12A 119.2 . . ? 
S1 C13A S1A 47.64(13) . . ? 
S1 C13A H13A 109.5 . . ? 
S1A C13A H13A 111.8 . . ? 
S1 C13A H13B 109.5 . . ? 
S1A C13A H13B 137.8 . . ? 
H13A C13A H13B 109.5 . . ? 
S1 C13A H13C 109.5 . . ? 
S1A C13A H13C 64.0 . . ? 
H13A C13A H13C 109.5 . . ? 
H13B C13A H13C 109.5 . . ? 
S1 C13A H13D 108.2 . . ? 
S1A C13A H13D 109.5 . . ? 
H13A C13A H13D 2.3 . . ? 
H13B C13A H13D 111.8 . . ? 
H13C C13A H13D 108.4 . . ? 
S1 C13A H13E 65.3 . . ? 
S1A C13A H13E 109.5 . . ? 
H13A C13A H13E 108.1 . . ? 
H13B C13A H13E 47.7 . . ? 
H13C C13A H13E 141.3 . . ? 
H13D C13A H13E 109.5 . . ? 
S1 C13A H13F 141.2 . . ? 
S1A C13A H13F 109.5 . . ? 
H13A C13A H13F 108.5 . . ? 
H13B C13A H13F 64.0 . . ? 
H13C C13A H13F 48.9 . . ? 
H13D C13A H13F 109.5 . . ? 
H13E C13A H13F 109.5 . . ? 
S1 C14A S1A 46.35(11) . . ? 
S1 C14A H14A 109.5 . . ? 
S1A C14A H14A 135.6 . . ? 
S1 C14A H14B 109.5 . . ? 
S1A C14A H14B 64.6 . . ? 
H14A C14A H14B 109.5 . . ? 
S1 C14A H14C 109.5 . . ? 
S1A C14A H14C 113.8 . . ? 
H14A C14A H14C 109.5 . . ? 
H14B C14A H14C 109.5 . . ? 
S1 C14A H14D 90.9 . . ? 
S1A C14A H14D 109.5 . . ? 
H14A C14A H14D 26.1 . . ? 
H14B C14A H14D 100.3 . . ? 
H14C C14A H14D 134.7 . . ? 
S1 C14A H14E 153.9 . . ? 
S1A C14A H14E 109.5 . . ? 
H14A C14A H14E 95.3 . . ? 
H14B C14A H14E 52.2 . . ? 
H14C C14A H14E 67.8 . . ? 
H14D C14A H14E 109.5 . . ? 
S1 C14A H14F 77.1 . . ? 
S1A C14A H14F 109.5 . . ? 
H14A C14A H14F 95.2 . . ? 
H14B C14A H14F 149.6 . . ? 
H14C C14A H14F 43.2 . . ? 
H14D C14A H14F 109.5 . . ? 
H14E C14A H14F 109.5 . . ? 
O2B Ca1B O2B 180.0 2_765 1_455 ? 
O2B Ca1B O3B 93.43(8) 2_765 2_665 ? 
O2B Ca1B O3B 86.57(8) 1_455 2_665 ? 
O2B Ca1B O3B 86.57(8) 2_765 . ? 
O2B Ca1B O3B 93.43(8) 1_455 . ? 
O3B Ca1B O3B 180.00(12) 2_665 . ? 
O2B Ca1B O1B 89.52(7) 2_765 2_665 ? 
O2B Ca1B O1B 90.48(7) 1_455 2_665 ? 
O3B Ca1B O1B 87.79(8) 2_665 2_665 ? 
O3B Ca1B O1B 92.21(8) . 2_665 ? 
O2B Ca1B O1B 90.48(7) 2_765 . ? 
O2B Ca1B O1B 89.52(7) 1_455 . ? 
O3B Ca1B O1B 92.21(8) 2_665 . ? 
O3B Ca1B O1B 87.79(8) . . ? 
O1B Ca1B O1B 180.00(10) 2_665 . ? 
O3B S1B C14B 104.19(19) . . ? 
O3B S1B C13B 107.45(17) . . ? 
C14B S1B C13B 97.8(2) . . ? 
O2B P1B O1B 119.84(12) . . ? 
O2B P1B C1B 108.16(13) . . ? 
O1B P1B C1B 109.43(13) . . ? 
O2B P1B C7B 107.80(13) . . ? 
O1B P1B C7B 108.62(13) . . ? 
C1B P1B C7B 101.40(13) . . ? 
P1B O1B Ca1B 141.18(13) . . ? 
P1B O2B Ca1B 172.20(14) . 1_655 ? 
S1B O3B Ca1B 136.32(13) . . ? 
C6B C1B C2B 118.8(3) . . ? 
C6B C1B P1B 120.9(2) . . ? 
C2B C1B P1B 120.1(2) . . ? 
C3B C2B C1B 119.9(3) . . ? 
C3B C2B H2BA 120.0 . . ? 
C1B C2B H2BA 120.0 . . ? 
C2B C3B C4B 120.4(3) . . ? 
C2B C3B H3BA 119.8 . . ? 
C4B C3B H3BA 119.8 . . ? 
C5B C4B C3B 120.1(3) . . ? 
C5B C4B H4BA 120.0 . . ? 
C3B C4B H4BA 120.0 . . ? 
C4B C5B C6B 119.9(3) . . ? 
C4B C5B H5BA 120.1 . . ? 
C6B C5B H5BA 120.1 . . ? 
C1B C6B C5B 120.8(3) . . ? 
C1B C6B H6BA 119.6 . . ? 
C5B C6B H6BA 119.6 . . ? 
C8B C7B C12B 118.2(3) . . ? 
C8B C7B P1B 121.1(2) . . ? 
C12B C7B P1B 120.6(2) . . ? 
C7B C8B C9B 120.0(3) . . ? 
C7B C8B H8BA 120.0 . . ? 
C9B C8B H8BA 120.0 . . ? 
C10B C9B C8B 121.0(3) . . ? 
C10B C9B H9BA 119.5 . . ? 
C8B C9B H9BA 119.5 . . ? 
C9B C10B C11B 119.8(3) . . ? 
C9B C10B H10B 120.1 . . ? 
C11B C10B H10B 120.1 . . ? 
C12B C11B C10B 119.5(3) . . ? 
C12B C11B H11B 120.2 . . ? 
C10B C11B H11B 120.2 . . ? 
C7B C12B C11B 121.5(3) . . ? 
C7B C12B H12B 119.2 . . ? 
C11B C12B H12B 119.2 . . ? 
S1B C13B H13G 109.5 . . ? 
S1B C13B H13H 109.5 . . ? 
H13G C13B H13H 109.5 . . ? 
S1B C13B H13I 109.5 . . ? 
H13G C13B H13I 109.5 . . ? 
H13H C13B H13I 109.5 . . ? 
S1B C14B H14G 109.5 . . ? 
S1B C14B H14H 109.5 . . ? 
H14G C14B H14H 109.5 . . ? 
S1B C14B H14I 109.5 . . ? 
H14G C14B H14I 109.5 . . ? 
H14H C14B H14I 109.5 . . ? 
 
_diffrn_measured_fraction_theta_max    0.994 
_diffrn_reflns_theta_full              27.45 
_diffrn_measured_fraction_theta_full   0.994 
_refine_diff_density_max    0.391 
_refine_diff_density_min   -0.450 
_refine_diff_density_rms    0.086 
 
#=== END

data_FO3788 
 
_audit_creation_method            SHELXL-97 
_chemical_name_systematic 
? 
_chemical_name_common             ? 
_chemical_melting_point           ? 
_chemical_formula_moiety          'C36 H42 Ca O3 P2 S4'
_chemical_formula_sum             'C36 H42 Ca O3 P2 S4' 
_chemical_formula_weight          752.96 
 
loop_ 
 _atom_type_symbol 
 _atom_type_description 
 _atom_type_scat_dispersion_real 
 _atom_type_scat_dispersion_imag 
 _atom_type_scat_source 
 'C'  'C'   0.0033   0.0016 
 'International Tables Vol C Tables 4.2.6.8 and 6.1.1.4' 
 'H'  'H'   0.0000   0.0000 
 'International Tables Vol C Tables 4.2.6.8 and 6.1.1.4' 
 'O'  'O'   0.0106   0.0060 
 'International Tables Vol C Tables 4.2.6.8 and 6.1.1.4' 
 'P'  'P'   0.1023   0.0942 
 'International Tables Vol C Tables 4.2.6.8 and 6.1.1.4' 
 'S'  'S'   0.1246   0.1234 
 'International Tables Vol C Tables 4.2.6.8 and 6.1.1.4' 
 'Ca'  'Ca'   0.2262   0.3064 
 'International Tables Vol C Tables 4.2.6.8 and 6.1.1.4' 
 
_symmetry_cell_setting            monoclinic 
_symmetry_space_group_name_H-M    'P 21/c'
_symmetry_space_group_name_Hall   '-P 2ybc'
 
loop_ 
 _symmetry_equiv_pos_as_xyz 
 'x, y, z' 
 '-x, y+1/2, -z+1/2' 
 '-x, -y, -z' 
 'x, -y-1/2, z-1/2' 
 
_cell_length_a                    20.0027(6) 
_cell_length_b                    12.9986(5) 
_cell_length_c                    15.7385(5) 
_cell_angle_alpha                 90.00 
_cell_angle_beta                  108.126(2) 
_cell_angle_gamma                 90.00 
_cell_volume                      3889.0(2) 
_cell_formula_units_Z             4 
_cell_measurement_temperature     183(2) 
_cell_measurement_reflns_used     25959 
_cell_measurement_theta_min       3.80
_cell_measurement_theta_max       27.49
 
_exptl_crystal_description        prism 
_exptl_crystal_colour             colourless
_exptl_crystal_size_max           0.05 
_exptl_crystal_size_mid           0.05 
_exptl_crystal_size_min           0.04 
_exptl_crystal_density_meas       ? 
_exptl_crystal_density_diffrn     1.286 
_exptl_crystal_density_method     'not measured' 
_exptl_crystal_F_000              1584 
_exptl_absorpt_coefficient_mu     0.491 
_exptl_absorpt_correction_type    none
_exptl_absorpt_correction_T_min   ?
_exptl_absorpt_correction_T_max   ?
_exptl_absorpt_process_details    ? 
 
_exptl_special_details 
? 
 
_diffrn_ambient_temperature       183(2) 
_diffrn_radiation_wavelength      0.71073 
_diffrn_radiation_type            MoK\a 
_diffrn_radiation_source          'fine-focus sealed tube' 
_diffrn_radiation_monochromator   graphite 
_diffrn_measurement_device_type   KappaCCD 
_diffrn_measurement_method        '\f - + \o -scan'
_diffrn_detector_area_resol_mean  ? 
_diffrn_standards_number          ? 
_diffrn_standards_interval_count  ? 
_diffrn_standards_interval_time   ? 
_diffrn_standards_decay_%         ? 
_diffrn_reflns_number             25959 
_diffrn_reflns_av_R_equivalents   0.0582 
_diffrn_reflns_av_sigmaI/netI     0.0673 
_diffrn_reflns_limit_h_min        -23 
_diffrn_reflns_limit_h_max        25 
_diffrn_reflns_limit_k_min        -13 
_diffrn_reflns_limit_k_max        16 
_diffrn_reflns_limit_l_min        -20 
_diffrn_reflns_limit_l_max        19 
_diffrn_reflns_theta_min          3.80 
_diffrn_reflns_theta_max          27.49 
_reflns_number_total              8806 
_reflns_number_gt                 5751 
_reflns_threshold_expression      >2sigma(I) 
 
_computing_data_collection        COLLECT 
_computing_cell_refinement        DENZO
_computing_data_reduction         DENZO
_computing_structure_solution     'SHELXS-97 (Sheldrick, 1990)' 
_computing_structure_refinement   'SHELXL-97 (Sheldrick, 1997)' 
_computing_molecular_graphics     SHELXTL/PC
_computing_publication_material   SHELXL-97
 
_refine_special_details 
; 
 Refinement of F^2^ against ALL reflections.  The weighted R-factor wR and 
 goodness of fit S are based on F^2^, conventional R-factors R are based 
 on F, with F set to zero for negative F^2^. The threshold expression of 
 F^2^ > 2sigma(F^2^) is used only for calculating R-factors(gt) etc. and is 
 not relevant to the choice of reflections for refinement.  R-factors based 
 on F^2^ are statistically about twice as large as those based on F, and R- 
 factors based on ALL data will be even larger. 
; 
 
_refine_ls_structure_factor_coef  Fsqd  
_refine_ls_matrix_type            full 
_refine_ls_weighting_scheme       calc  
_refine_ls_weighting_details 
 'calc w=1/[\s^2^(Fo^2^)+(0.0611P)^2^+2.4477P] where P=(Fo^2^+2Fc^2^)/3' 
_atom_sites_solution_primary      direct 
_atom_sites_solution_secondary    difmap 
_atom_sites_solution_hydrogens    geom 
_refine_ls_hydrogen_treatment     constr
_refine_ls_extinction_method      none 
_refine_ls_extinction_coef        ? 
_refine_ls_number_reflns          8806 
_refine_ls_number_parameters      408 
_refine_ls_number_restraints      0 
_refine_ls_R_factor_all           0.0961 
_refine_ls_R_factor_gt            0.0522 
_refine_ls_wR_factor_ref          0.1381 
_refine_ls_wR_factor_gt           0.1189 
_refine_ls_goodness_of_fit_ref    1.018 
_refine_ls_restrained_S_all       1.018 
_refine_ls_shift/su_max           0.001 
_refine_ls_shift/su_mean          0.000 
 
loop_ 
 _atom_site_label 
 _atom_site_type_symbol 
 _atom_site_fract_x 
 _atom_site_fract_y 
 _atom_site_fract_z 
 _atom_site_U_iso_or_equiv 
 _atom_site_adp_type 
 _atom_site_occupancy 
 _atom_site_symmetry_multiplicity 
 _atom_site_calc_flag 
 _atom_site_refinement_flags 
 _atom_site_disorder_assembly 
 _atom_site_disorder_group 
Ca1 Ca 0.24199(3) -0.05993(5) 0.66507(4) 0.03217(16) Uani 1 1 d . B . 
S1 S 0.31667(4) 0.13514(6) 0.70629(5) 0.03662(19) Uani 1 1 d . . . 
S2 S 0.34023(4) -0.03879(6) 0.56220(5) 0.0390(2) Uani 1 1 d . . . 
S3 S 0.13269(4) -0.19947(6) 0.68714(6) 0.0399(2) Uani 1 1 d . . . 
S4 S 0.24074(4) -0.25008(6) 0.56696(6) 0.03764(19) Uani 1 1 d . . . 
P1 P 0.37453(4) 0.08978(6) 0.63019(5) 0.02910(17) Uani 1 1 d . . . 
P2 P 0.16204(4) -0.29898(6) 0.60909(5) 0.03263(19) Uani 1 1 d . . . 
O1 O 0.15289(12) 0.01815(17) 0.54243(15) 0.0464(6) Uani 1 1 d . B . 
O2 O 0.18524(14) 0.0334(2) 0.75788(19) 0.0662(8) Uani 1 1 d . . . 
O3 O 0.32178(11) -0.1263(2) 0.79876(15) 0.0501(6) Uani 1 1 d . . . 
C1 C 0.38022(16) 0.1937(2) 0.55556(19) 0.0343(7) Uani 1 1 d . . . 
C2 C 0.3792(2) 0.2956(3) 0.5816(2) 0.0487(9) Uani 1 1 d . . . 
H2A H 0.3719 0.3116 0.6369 0.058 Uiso 1 1 calc R . . 
C3 C 0.3888(3) 0.3740(3) 0.5265(3) 0.0687(12) Uani 1 1 d . . . 
H3A H 0.3887 0.4437 0.5445 0.082 Uiso 1 1 calc R . . 
C4 C 0.3984(3) 0.3507(4) 0.4461(3) 0.0785(15) Uani 1 1 d . . . 
H4A H 0.4050 0.4044 0.4086 0.094 Uiso 1 1 calc R . . 
C5 C 0.3983(3) 0.2512(3) 0.4198(2) 0.0714(13) Uani 1 1 d . . . 
H5A H 0.4039 0.2358 0.3634 0.086 Uiso 1 1 calc R . . 
C6 C 0.3903(2) 0.1717(3) 0.4749(2) 0.0504(9) Uani 1 1 d . . . 
H6A H 0.3917 0.1022 0.4568 0.060 Uiso 1 1 calc R . . 
C7 C 0.46640(15) 0.0763(2) 0.69760(19) 0.0322(6) Uani 1 1 d . . . 
C8 C 0.50857(18) 0.0002(3) 0.6795(3) 0.0487(8) Uani 1 1 d . . . 
H8A H 0.4890 -0.0493 0.6342 0.058 Uiso 1 1 calc R . . 
C9 C 0.5796(2) -0.0032(3) 0.7280(3) 0.0650(11) Uani 1 1 d . . . 
H9A H 0.6086 -0.0552 0.7154 0.078 Uiso 1 1 calc R . . 
C10 C 0.60817(19) 0.0669(3) 0.7933(3) 0.0612(11) Uani 1 1 d . . . 
H10A H 0.6569 0.0639 0.8257 0.073 Uiso 1 1 calc R . . 
C11 C 0.56689(19) 0.1420(3) 0.8123(2) 0.0564(10) Uani 1 1 d . . . 
H11A H 0.5869 0.1906 0.8583 0.068 Uiso 1 1 calc R . . 
C12 C 0.49624(17) 0.1467(3) 0.7647(2) 0.0452(8) Uani 1 1 d . . . 
H12A H 0.4678 0.1989 0.7780 0.054 Uiso 1 1 calc R . . 
C13 C 0.18787(15) -0.4218(2) 0.6664(2) 0.0387(7) Uani 1 1 d . . . 
C14 C 0.20301(16) -0.5040(2) 0.6191(2) 0.0414(8) Uani 1 1 d . . . 
H14A H 0.1961 -0.4973 0.5569 0.050 Uiso 1 1 calc R . . 
C15 C 0.22831(17) -0.5962(3) 0.6623(3) 0.0525(10) Uani 1 1 d . . . 
H15A H 0.2375 -0.6527 0.6293 0.063 Uiso 1 1 calc R . . 
C16 C 0.23986(19) -0.6053(3) 0.7522(3) 0.0581(10) Uani 1 1 d . . . 
H16A H 0.2578 -0.6679 0.7817 0.070 Uiso 1 1 calc R . . 
C17 C 0.2257(2) -0.5245(3) 0.8001(3) 0.0621(11) Uani 1 1 d . . . 
H17A H 0.2345 -0.5311 0.8628 0.075 Uiso 1 1 calc R . . 
C18 C 0.1986(2) -0.4328(3) 0.7572(3) 0.0545(9) Uani 1 1 d . . . 
H18A H 0.1874 -0.3779 0.7903 0.065 Uiso 1 1 calc R . . 
C19 C 0.08606(15) -0.3300(2) 0.5142(2) 0.0339(7) Uani 1 1 d . . . 
C20 C 0.08700(17) -0.3239(3) 0.4268(2) 0.0442(8) Uani 1 1 d . . . 
H20A H 0.1293 -0.3054 0.4152 0.053 Uiso 1 1 calc R . . 
C21 C 0.02674(19) -0.3446(3) 0.3555(3) 0.0552(9) Uani 1 1 d . . . 
H21A H 0.0282 -0.3407 0.2958 0.066 Uiso 1 1 calc R . . 
C22 C -0.03472(19) -0.3706(3) 0.3716(3) 0.0554(10) Uani 1 1 d . . . 
H22A H -0.0759 -0.3848 0.3232 0.067 Uiso 1 1 calc R . . 
C23 C -0.03642(19) -0.3760(4) 0.4579(3) 0.0634(11) Uani 1 1 d . . . 
H23A H -0.0790 -0.3940 0.4691 0.076 Uiso 1 1 calc R . . 
C24 C 0.02301(18) -0.3556(3) 0.5286(3) 0.0536(10) Uani 1 1 d . . . 
H24A H 0.0209 -0.3591 0.5879 0.064 Uiso 1 1 calc R . . 
C25 C 0.1065(2) -0.0407(3) 0.4722(3) 0.0732(13) Uani 1 1 d . B . 
H25A H 0.0763 -0.0849 0.4962 0.088 Uiso 1 1 calc R . . 
H25B H 0.1339 -0.0854 0.4443 0.088 Uiso 1 1 calc R . . 
C26 C 0.0630(3) 0.0310(4) 0.4057(4) 0.0996(19) Uani 1 1 d . . . 
H26A H 0.0544 0.0033 0.3446 0.120 Uiso 0.50 1 calc PR A 1 
H26B H 0.0170 0.0415 0.4159 0.120 Uiso 0.50 1 calc PR A 1 
H26C H 0.0124 0.0142 0.3912 0.120 Uiso 0.50 1 calc PR A 2 
H26D H 0.0761 0.0302 0.3501 0.120 Uiso 0.50 1 calc PR A 2 
C27 C 0.0998(4) 0.1244(6) 0.4153(5) 0.0541(19) Uiso 0.50 1 d P B 1 
H27A H 0.0672 0.1833 0.4085 0.065 Uiso 0.50 1 calc PR B 1 
H27B H 0.1244 0.1303 0.3698 0.065 Uiso 0.50 1 calc PR B 1 
C27A C 0.0801(6) 0.1373(8) 0.4540(8) 0.086(3) Uiso 0.50 1 d P B 2 
H27C H 0.0762 0.1940 0.4107 0.103 Uiso 0.50 1 calc PR B 2 
H27D H 0.0487 0.1516 0.4904 0.103 Uiso 0.50 1 calc PR B 2 
C28 C 0.1532(3) 0.1222(3) 0.5104(4) 0.0832(15) Uani 1 1 d . . . 
H28A H 0.2007 0.1412 0.5088 0.100 Uiso 0.50 1 calc PR B 1 
H28B H 0.1390 0.1712 0.5499 0.100 Uiso 0.50 1 calc PR B 1 
H28C H 0.1862 0.1296 0.4752 0.100 Uiso 0.50 1 calc PR B 2 
H28D H 0.1662 0.1719 0.5606 0.100 Uiso 0.50 1 calc PR B 2 
C29 C 0.1211(5) 0.1033(8) 0.7165(7) 0.075(3) Uiso 0.50 1 d P C 1 
H29A H 0.1306 0.1552 0.6757 0.090 Uiso 0.50 1 calc PR C 1 
H29B H 0.0787 0.0631 0.6845 0.090 Uiso 0.50 1 calc PR C 1 
C30 C 0.1147(8) 0.1514(12) 0.8004(10) 0.117(5) Uiso 0.50 1 d P C 1 
H30A H 0.1311 0.2236 0.8037 0.140 Uiso 0.50 1 calc PR C 1 
H30B H 0.0645 0.1525 0.7972 0.140 Uiso 0.50 1 calc PR C 1 
C31 C 0.1466(6) 0.1087(9) 0.8651(8) 0.088(3) Uiso 0.50 1 d P C 1 
H31A H 0.1163 0.0567 0.8808 0.105 Uiso 0.50 1 calc PR C 1 
H31B H 0.1618 0.1585 0.9150 0.105 Uiso 0.50 1 calc PR C 1 
C29A C 0.1168(5) 0.0524(8) 0.7446(6) 0.065(2) Uiso 0.50 1 d P C 2 
H29C H 0.0933 -0.0154 0.7391 0.078 Uiso 0.50 1 calc PR C 2 
H29D H 0.0987 0.0858 0.6853 0.078 Uiso 0.50 1 calc PR C 2 
C30A C 0.0923(5) 0.1098(9) 0.8023(7) 0.075(3) Uiso 0.50 1 d P C 2 
H30C H 0.0648 0.0687 0.8328 0.090 Uiso 0.50 1 calc PR C 2 
H30D H 0.0654 0.1713 0.7737 0.090 Uiso 0.50 1 calc PR C 2 
C31A C 0.1851(4) 0.1416(7) 0.8779(5) 0.0564(19) Uiso 0.50 1 d P C 2 
H31C H 0.2035 0.2067 0.8613 0.068 Uiso 0.50 1 calc PR C 2 
H31D H 0.1890 0.1420 0.9422 0.068 Uiso 0.50 1 calc PR C 2 
C32 C 0.2160(3) 0.0520(5) 0.8520(4) 0.109(2) Uani 1 1 d . C . 
H32A H 0.2574 0.0980 0.8655 0.131 Uiso 0.50 1 calc PR D 1 
H32B H 0.2283 -0.0124 0.8870 0.131 Uiso 0.50 1 calc PR D 1 
H32C H 0.2673 0.0621 0.8661 0.131 Uiso 0.50 1 calc PR D 2 
H32D H 0.2082 -0.0085 0.8860 0.131 Uiso 0.50 1 calc PR D 2 
C33 C 0.39581(19) -0.1310(3) 0.8140(3) 0.0568(10) Uani 1 1 d . C . 
H33A H 0.4189 -0.0656 0.8393 0.068 Uiso 0.50 1 calc PR E 1 
H33B H 0.4066 -0.1463 0.7580 0.068 Uiso 0.50 1 calc PR E 1 
H33C H 0.4148 -0.0614 0.8099 0.068 Uiso 0.50 1 calc PR E 2 
H33D H 0.4065 -0.1758 0.7690 0.068 Uiso 0.50 1 calc PR E 2 
C34 C 0.4189(4) -0.2197(7) 0.8815(6) 0.056(2) Uiso 0.50 1 d P C 1 
H34A H 0.4431 -0.2730 0.8570 0.067 Uiso 0.50 1 calc PR C 1 
H34B H 0.4525 -0.1935 0.9377 0.067 Uiso 0.50 1 calc PR C 1 
C35 C 0.3632(5) -0.2614(8) 0.8988(6) 0.065(2) Uiso 0.50 1 d P C 1 
C36 C 0.3048(4) -0.1659(6) 0.8785(5) 0.0424(15) Uiso 0.50 1 d P C 1 
C34A C 0.4280(6) -0.1748(9) 0.9070(7) 0.077(3) Uiso 0.50 1 d P C 2 
H34C H 0.4618 -0.2303 0.9065 0.092 Uiso 0.50 1 calc PR C 2 
H34D H 0.4529 -0.1205 0.9491 0.092 Uiso 0.50 1 calc PR C 2 
C35A C 0.3696(5) -0.2145(8) 0.9322(6) 0.067(2) Uiso 0.50 1 d P C 2 
H35A H 0.3596 -0.1697 0.9776 0.081 Uiso 0.50 1 calc PR C 2 
H35B H 0.3801 -0.2847 0.9573 0.081 Uiso 0.50 1 calc PR C 2 
C36A C 0.3101(5) -0.2164(7) 0.8511(6) 0.062(2) Uiso 0.50 1 d P C 2 
H36A H 0.2653 -0.2093 0.8648 0.074 Uiso 0.50 1 calc PR C 2 
H36B H 0.3091 -0.2812 0.8177 0.074 Uiso 0.50 1 calc PR C 2 
 
loop_ 
 _atom_site_aniso_label 
 _atom_site_aniso_U_11 
 _atom_site_aniso_U_22 
 _atom_site_aniso_U_33 
 _atom_site_aniso_U_23 
 _atom_site_aniso_U_13 
 _atom_site_aniso_U_12 
Ca1 0.0294(3) 0.0359(4) 0.0309(3) -0.0005(3) 0.0090(3) -0.0022(3) 
S1 0.0366(4) 0.0379(5) 0.0394(4) -0.0086(3) 0.0177(4) -0.0044(3) 
S2 0.0471(5) 0.0367(4) 0.0381(4) -0.0109(3) 0.0205(4) -0.0119(4) 
S3 0.0381(4) 0.0395(5) 0.0474(5) -0.0050(4) 0.0213(4) -0.0034(3) 
S4 0.0322(4) 0.0341(4) 0.0518(5) -0.0010(4) 0.0207(4) -0.0030(3) 
P1 0.0302(4) 0.0313(4) 0.0263(4) -0.0020(3) 0.0096(3) -0.0034(3) 
P2 0.0285(4) 0.0299(4) 0.0413(4) 0.0020(3) 0.0135(3) -0.0013(3) 
O1 0.0441(13) 0.0366(13) 0.0489(13) 0.0051(10) 0.0007(11) 0.0018(10) 
O2 0.0552(16) 0.080(2) 0.0752(19) -0.0391(16) 0.0379(15) -0.0225(14) 
O3 0.0365(12) 0.0691(17) 0.0397(12) 0.0204(12) 0.0047(10) -0.0089(11) 
C1 0.0344(16) 0.0374(18) 0.0260(14) 0.0017(12) 0.0022(13) -0.0067(13) 
C2 0.063(2) 0.039(2) 0.0425(19) 0.0042(15) 0.0150(18) -0.0020(17) 
C3 0.107(4) 0.040(2) 0.053(2) 0.0071(18) 0.018(2) -0.014(2) 
C4 0.119(4) 0.062(3) 0.047(2) 0.016(2) 0.016(3) -0.033(3) 
C5 0.110(4) 0.070(3) 0.0336(19) 0.0013(19) 0.021(2) -0.033(3) 
C6 0.072(2) 0.046(2) 0.0333(17) 0.0008(15) 0.0173(18) -0.0130(18) 
C7 0.0329(15) 0.0356(17) 0.0293(14) 0.0052(12) 0.0115(13) -0.0020(13) 
C8 0.0416(19) 0.044(2) 0.060(2) -0.0020(17) 0.0141(17) 0.0071(16) 
C9 0.041(2) 0.060(3) 0.088(3) -0.003(2) 0.011(2) 0.0143(19) 
C10 0.0333(19) 0.078(3) 0.064(2) 0.018(2) 0.0025(18) 0.0096(19) 
C11 0.041(2) 0.072(3) 0.045(2) -0.0068(19) -0.0028(17) -0.0051(19) 
C12 0.0379(18) 0.055(2) 0.0389(18) -0.0066(16) 0.0069(15) 0.0007(16) 
C13 0.0274(15) 0.0370(18) 0.0504(19) 0.0061(14) 0.0105(14) -0.0047(13) 
C14 0.0309(16) 0.0343(18) 0.056(2) 0.0015(15) 0.0088(15) -0.0020(14) 
C15 0.0336(18) 0.036(2) 0.082(3) 0.0021(18) 0.0090(19) 0.0000(15) 
C16 0.040(2) 0.043(2) 0.082(3) 0.019(2) 0.004(2) -0.0023(17) 
C17 0.060(2) 0.064(3) 0.056(2) 0.024(2) 0.010(2) -0.009(2) 
C18 0.063(2) 0.050(2) 0.052(2) 0.0125(17) 0.0211(19) -0.0010(18) 
C19 0.0310(15) 0.0257(15) 0.0451(17) 0.0005(13) 0.0121(14) 0.0003(12) 
C20 0.0393(18) 0.045(2) 0.0489(19) -0.0021(16) 0.0148(16) -0.0011(15) 
C21 0.050(2) 0.067(3) 0.047(2) -0.0052(19) 0.0122(18) -0.0005(19) 
C22 0.0398(19) 0.061(3) 0.056(2) -0.0061(19) 0.0011(17) -0.0021(17) 
C23 0.0353(19) 0.088(3) 0.064(3) -0.003(2) 0.0112(19) -0.016(2) 
C24 0.0411(19) 0.072(3) 0.051(2) -0.0010(19) 0.0179(17) -0.0124(18) 
C25 0.074(3) 0.055(3) 0.065(3) 0.013(2) -0.015(2) -0.015(2) 
C26 0.088(4) 0.097(4) 0.077(3) 0.028(3) -0.026(3) 0.001(3) 
C28 0.074(3) 0.049(3) 0.101(4) 0.022(3) -0.010(3) -0.005(2) 
C32 0.128(5) 0.141(6) 0.076(3) -0.031(4) 0.056(4) 0.002(4) 
C33 0.047(2) 0.074(3) 0.055(2) 0.019(2) 0.0231(19) 0.0151(19) 
 
_geom_special_details 
; 
 All esds (except the esd in the dihedral angle between two l.s. planes) 
 are estimated using the full covariance matrix.  The cell esds are taken 
 into account individually in the estimation of esds in distances, angles 
 and torsion angles; correlations between esds in cell parameters are only 
 used when they are defined by crystal symmetry.  An approximate (isotropic) 
 treatment of cell esds is used for estimating esds involving l.s. planes. 
; 
 
loop_ 
 _geom_bond_atom_site_label_1 
 _geom_bond_atom_site_label_2 
 _geom_bond_distance 
 _geom_bond_site_symmetry_2 
 _geom_bond_publ_flag 
Ca1 O3 2.373(2) . ? 
Ca1 O1 2.407(2) . ? 
Ca1 O2 2.435(2) . ? 
Ca1 S4 2.9103(10) . ? 
Ca1 S1 2.9118(10) . ? 
Ca1 S2 2.9217(9) . ? 
Ca1 S3 2.9434(10) . ? 
Ca1 P1 3.4673(9) . ? 
Ca1 P2 3.4803(10) . ? 
S1 P1 1.9960(10) . ? 
S2 P1 1.9879(11) . ? 
S3 P2 1.9939(11) . ? 
S4 P2 1.9930(10) . ? 
P1 C1 1.816(3) . ? 
P1 C7 1.822(3) . ? 
P2 C19 1.814(3) . ? 
P2 C13 1.828(3) . ? 
O1 C25 1.424(5) . ? 
O1 C28 1.444(5) . ? 
O2 C29A 1.342(9) . ? 
O2 C32 1.436(6) . ? 
O2 C29 1.541(10) . ? 
O3 C33 1.426(4) . ? 
O3 C36A 1.491(9) . ? 
O3 C36 1.490(7) . ? 
C1 C6 1.376(4) . ? 
C1 C2 1.388(5) . ? 
C2 C3 1.390(5) . ? 
C2 H2A 0.9500 . ? 
C3 C4 1.371(6) . ? 
C3 H3A 0.9500 . ? 
C4 C5 1.358(6) . ? 
C4 H4A 0.9500 . ? 
C5 C6 1.390(5) . ? 
C5 H5A 0.9500 . ? 
C6 H6A 0.9500 . ? 
C7 C12 1.385(4) . ? 
C7 C8 1.386(4) . ? 
C8 C9 1.389(5) . ? 
C8 H8A 0.9500 . ? 
C9 C10 1.359(6) . ? 
C9 H9A 0.9500 . ? 
C10 C11 1.370(6) . ? 
C10 H10A 0.9500 . ? 
C11 C12 1.380(5) . ? 
C11 H11A 0.9500 . ? 
C12 H12A 0.9500 . ? 
C13 C18 1.384(5) . ? 
C13 C14 1.389(5) . ? 
C14 C15 1.393(5) . ? 
C14 H14A 0.9500 . ? 
C15 C16 1.366(6) . ? 
C15 H15A 0.9500 . ? 
C16 C17 1.372(6) . ? 
C16 H16A 0.9500 . ? 
C17 C18 1.394(5) . ? 
C17 H17A 0.9500 . ? 
C18 H18A 0.9500 . ? 
C19 C24 1.389(4) . ? 
C19 C20 1.384(4) . ? 
C20 C21 1.394(5) . ? 
C20 H20A 0.9500 . ? 
C21 C22 1.373(5) . ? 
C21 H21A 0.9500 . ? 
C22 C23 1.371(5) . ? 
C22 H22A 0.9500 . ? 
C23 C24 1.377(5) . ? 
C23 H23A 0.9500 . ? 
C24 H24A 0.9500 . ? 
C25 C26 1.469(6) . ? 
C25 H25A 0.9900 . ? 
C25 H25B 0.9900 . ? 
C26 C27 1.403(9) . ? 
C26 C27A 1.562(12) . ? 
C26 H26A 0.9900 . ? 
C26 H26B 0.9900 . ? 
C26 H26C 0.9900 . ? 
C26 H26D 0.9900 . ? 
C27 C28 1.545(9) . ? 
C27 H27A 0.9900 . ? 
C27 H27B 0.9900 . ? 
C27A C28 1.468(11) . ? 
C27A H27C 0.9900 . ? 
C27A H27D 0.9900 . ? 
C28 H28A 0.9900 . ? 
C28 H28B 0.9900 . ? 
C28 H28C 0.9900 . ? 
C28 H28D 0.9900 . ? 
C29 C30 1.501(17) . ? 
C29 H29A 0.9900 . ? 
C29 H29B 0.9900 . ? 
C30 C31 1.161(16) . ? 
C30 H30A 0.9900 . ? 
C30 H30B 0.9900 . ? 
C31 C32 1.640(12) . ? 
C31 H31A 0.9900 . ? 
C31 H31B 0.9900 . ? 
C29A C30A 1.378(13) . ? 
C29A H29C 0.9900 . ? 
C29A H29D 0.9900 . ? 
C30A C31A 1.913(13) . ? 
C30A H30C 0.9900 . ? 
C30A H30D 0.9900 . ? 
C31A C32 1.437(9) . ? 
C31A H31C 0.9900 . ? 
C31A H31D 0.9900 . ? 
C32 H32A 0.9900 . ? 
C32 H32B 0.9900 . ? 
C32 H32C 0.9900 . ? 
C32 H32D 0.9900 . ? 
C33 C34A 1.515(11) . ? 
C33 C34 1.538(9) . ? 
C33 H33A 0.9900 . ? 
C33 H33B 0.9900 . ? 
C33 H33C 0.9900 . ? 
C33 H33D 0.9900 . ? 
C34 C35 1.342(12) . ? 
C34 H34A 0.9900 . ? 
C34 H34B 0.9900 . ? 
C35 C36 1.667(12) . ? 
C34A C35A 1.442(13) . ? 
C34A H34C 0.9900 . ? 
C34A H34D 0.9900 . ? 
C35A C36A 1.450(12) . ? 
C35A H35A 0.9900 . ? 
C35A H35B 0.9900 . ? 
C36A H36A 0.9900 . ? 
C36A H36B 0.9900 . ? 
 
loop_ 
 _geom_angle_atom_site_label_1 
 _geom_angle_atom_site_label_2 
 _geom_angle_atom_site_label_3 
 _geom_angle 
 _geom_angle_site_symmetry_1 
 _geom_angle_site_symmetry_3 
 _geom_angle_publ_flag 
O3 Ca1 O1 172.15(9) . . ? 
O3 Ca1 O2 87.70(10) . . ? 
O1 Ca1 O2 84.48(10) . . ? 
O3 Ca1 S4 93.10(7) . . ? 
O1 Ca1 S4 92.90(6) . . ? 
O2 Ca1 S4 144.40(7) . . ? 
O3 Ca1 S1 87.83(6) . . ? 
O1 Ca1 S1 90.69(6) . . ? 
O2 Ca1 S1 74.62(7) . . ? 
S4 Ca1 S1 140.98(3) . . ? 
O3 Ca1 S2 98.21(6) . . ? 
O1 Ca1 S2 88.50(6) . . ? 
O2 Ca1 S2 143.61(7) . . ? 
S4 Ca1 S2 71.47(2) . . ? 
S1 Ca1 S2 69.80(2) . . ? 
O3 Ca1 S3 89.47(6) . . ? 
O1 Ca1 S3 87.86(6) . . ? 
O2 Ca1 S3 74.59(7) . . ? 
S4 Ca1 S3 69.83(2) . . ? 
S1 Ca1 S3 149.17(3) . . ? 
S2 Ca1 S3 140.87(3) . . ? 
O3 Ca1 P1 90.46(6) . . ? 
O1 Ca1 P1 92.77(6) . . ? 
O2 Ca1 P1 109.72(7) . . ? 
S4 Ca1 P1 105.87(2) . . ? 
S1 Ca1 P1 35.12(2) . . ? 
S2 Ca1 P1 34.95(2) . . ? 
S3 Ca1 P1 175.69(3) . . ? 
O3 Ca1 P2 91.67(6) . . ? 
O1 Ca1 P2 90.35(6) . . ? 
O2 Ca1 P2 109.49(7) . . ? 
S4 Ca1 P2 34.92(2) . . ? 
S1 Ca1 P2 175.84(3) . . ? 
S2 Ca1 P2 106.20(3) . . ? 
S3 Ca1 P2 34.91(2) . . ? 
P1 Ca1 P2 140.79(2) . . ? 
P1 S1 Ca1 87.83(4) . . ? 
P1 S2 Ca1 87.70(3) . . ? 
P2 S3 Ca1 87.43(3) . . ? 
P2 S4 Ca1 88.37(4) . . ? 
C1 P1 C7 101.15(13) . . ? 
C1 P1 S2 110.95(10) . . ? 
C7 P1 S2 110.43(11) . . ? 
C1 P1 S1 109.46(11) . . ? 
C7 P1 S1 110.31(10) . . ? 
S2 P1 S1 113.82(5) . . ? 
C1 P1 Ca1 136.42(10) . . ? 
C7 P1 Ca1 122.41(9) . . ? 
S2 P1 Ca1 57.35(3) . . ? 
S1 P1 Ca1 57.05(3) . . ? 
C19 P2 C13 104.38(14) . . ? 
C19 P2 S4 110.06(10) . . ? 
C13 P2 S4 108.16(10) . . ? 
C19 P2 S3 108.63(10) . . ? 
C13 P2 S3 110.77(12) . . ? 
S4 P2 S3 114.37(5) . . ? 
C19 P2 Ca1 127.44(10) . . ? 
C13 P2 Ca1 128.16(11) . . ? 
S4 P2 Ca1 56.71(3) . . ? 
S3 P2 Ca1 57.66(3) . . ? 
C25 O1 C28 107.7(3) . . ? 
C25 O1 Ca1 122.5(2) . . ? 
C28 O1 Ca1 126.3(2) . . ? 
C29A O2 C32 102.6(5) . . ? 
C29A O2 C29 31.9(5) . . ? 
C32 O2 C29 111.7(5) . . ? 
C29A O2 Ca1 129.9(4) . . ? 
C32 O2 Ca1 124.9(3) . . ? 
C29 O2 Ca1 121.5(4) . . ? 
C33 O3 C36A 101.9(4) . . ? 
C33 O3 C36 110.0(3) . . ? 
C36A O3 C36 31.5(4) . . ? 
C33 O3 Ca1 122.76(19) . . ? 
C36A O3 Ca1 126.7(4) . . ? 
C36 O3 Ca1 127.3(3) . . ? 
C6 C1 C2 119.4(3) . . ? 
C6 C1 P1 119.9(3) . . ? 
C2 C1 P1 120.6(2) . . ? 
C1 C2 C3 119.8(3) . . ? 
C1 C2 H2A 120.1 . . ? 
C3 C2 H2A 120.1 . . ? 
C4 C3 C2 120.0(4) . . ? 
C4 C3 H3A 120.0 . . ? 
C2 C3 H3A 120.0 . . ? 
C5 C4 C3 120.3(4) . . ? 
C5 C4 H4A 119.9 . . ? 
C3 C4 H4A 119.9 . . ? 
C4 C5 C6 120.5(4) . . ? 
C4 C5 H5A 119.7 . . ? 
C6 C5 H5A 119.7 . . ? 
C1 C6 C5 120.0(4) . . ? 
C1 C6 H6A 120.0 . . ? 
C5 C6 H6A 120.0 . . ? 
C12 C7 C8 118.9(3) . . ? 
C12 C7 P1 119.8(2) . . ? 
C8 C7 P1 121.2(3) . . ? 
C7 C8 C9 119.6(4) . . ? 
C7 C8 H8A 120.2 . . ? 
C9 C8 H8A 120.2 . . ? 
C10 C9 C8 120.8(4) . . ? 
C10 C9 H9A 119.6 . . ? 
C8 C9 H9A 119.6 . . ? 
C9 C10 C11 120.2(4) . . ? 
C9 C10 H10A 119.9 . . ? 
C11 C10 H10A 119.9 . . ? 
C10 C11 C12 119.8(4) . . ? 
C10 C11 H11A 120.1 . . ? 
C12 C11 H11A 120.1 . . ? 
C11 C12 C7 120.7(3) . . ? 
C11 C12 H12A 119.6 . . ? 
C7 C12 H12A 119.6 . . ? 
C18 C13 C14 119.0(3) . . ? 
C18 C13 P2 121.9(3) . . ? 
C14 C13 P2 118.8(3) . . ? 
C13 C14 C15 120.5(3) . . ? 
C13 C14 H14A 119.8 . . ? 
C15 C14 H14A 119.8 . . ? 
C16 C15 C14 119.9(4) . . ? 
C16 C15 H15A 120.0 . . ? 
C14 C15 H15A 120.0 . . ? 
C15 C16 C17 120.4(4) . . ? 
C15 C16 H16A 119.8 . . ? 
C17 C16 H16A 119.8 . . ? 
C16 C17 C18 120.2(4) . . ? 
C16 C17 H17A 119.9 . . ? 
C18 C17 H17A 119.9 . . ? 
C13 C18 C17 120.0(4) . . ? 
C13 C18 H18A 120.0 . . ? 
C17 C18 H18A 120.0 . . ? 
C24 C19 C20 118.0(3) . . ? 
C24 C19 P2 119.3(2) . . ? 
C20 C19 P2 122.6(2) . . ? 
C19 C20 C21 120.9(3) . . ? 
C19 C20 H20A 119.6 . . ? 
C21 C20 H20A 119.6 . . ? 
C22 C21 C20 119.9(3) . . ? 
C22 C21 H21A 120.0 . . ? 
C20 C21 H21A 120.0 . . ? 
C23 C22 C21 119.7(4) . . ? 
C23 C22 H22A 120.1 . . ? 
C21 C22 H22A 120.1 . . ? 
C22 C23 C24 120.6(3) . . ? 
C22 C23 H23A 119.7 . . ? 
C24 C23 H23A 119.7 . . ? 
C23 C24 C19 120.9(3) . . ? 
C23 C24 H24A 119.5 . . ? 
C19 C24 H24A 119.5 . . ? 
O1 C25 C26 108.1(4) . . ? 
O1 C25 H25A 110.1 . . ? 
C26 C25 H25A 110.1 . . ? 
O1 C25 H25B 110.1 . . ? 
C26 C25 H25B 110.1 . . ? 
H25A C25 H25B 108.4 . . ? 
C27 C26 C25 107.3(5) . . ? 
C27 C26 C27A 32.3(4) . . ? 
C25 C26 C27A 102.9(5) . . ? 
C27 C26 H26A 110.3 . . ? 
C25 C26 H26A 110.3 . . ? 
C27A C26 H26A 137.7 . . ? 
C27 C26 H26B 110.3 . . ? 
C25 C26 H26B 110.3 . . ? 
C27A C26 H26B 82.7 . . ? 
H26A C26 H26B 108.5 . . ? 
C27 C26 H26C 132.9 . . ? 
C25 C26 H26C 111.2 . . ? 
C27A C26 H26C 111.2 . . ? 
H26A C26 H26C 80.7 . . ? 
H26B C26 H26C 30.1 . . ? 
C27 C26 H26D 80.2 . . ? 
C25 C26 H26D 111.2 . . ? 
C27A C26 H26D 111.2 . . ? 
H26A C26 H26D 31.9 . . ? 
H26B C26 H26D 131.4 . . ? 
H26C C26 H26D 109.1 . . ? 
C26 C27 C28 105.7(6) . . ? 
C26 C27 H27A 110.6 . . ? 
C28 C27 H27A 110.6 . . ? 
C26 C27 H27B 110.6 . . ? 
C28 C27 H27B 110.6 . . ? 
H27A C27 H27B 108.7 . . ? 
C28 C27A C26 101.7(7) . . ? 
C28 C27A H27C 111.4 . . ? 
C26 C27A H27C 111.4 . . ? 
C28 C27A H27D 111.4 . . ? 
C26 C27A H27D 111.4 . . ? 
H27C C27A H27D 109.3 . . ? 
O1 C28 C27A 103.0(5) . . ? 
O1 C28 C27 106.2(4) . . ? 
C27A C28 C27 32.2(4) . . ? 
O1 C28 H28A 110.5 . . ? 
C27A C28 H28A 137.3 . . ? 
C27 C28 H28A 110.5 . . ? 
O1 C28 H28B 110.5 . . ? 
C27A C28 H28B 82.5 . . ? 
C27 C28 H28B 110.5 . . ? 
H28A C28 H28B 108.7 . . ? 
O1 C28 H28C 111.2 . . ? 
C27A C28 H28C 111.2 . . ? 
C27 C28 H28C 80.6 . . ? 
H28A C28 H28C 31.6 . . ? 
H28B C28 H28C 131.3 . . ? 
O1 C28 H28D 111.2 . . ? 
C27A C28 H28D 111.2 . . ? 
C27 C28 H28D 133.8 . . ? 
H28A C28 H28D 80.9 . . ? 
H28B C28 H28D 30.3 . . ? 
H28C C28 H28D 109.1 . . ? 
C30 C29 O2 99.3(8) . . ? 
C30 C29 H29A 111.9 . . ? 
O2 C29 H29A 111.9 . . ? 
C30 C29 H29B 111.9 . . ? 
O2 C29 H29B 111.9 . . ? 
H29A C29 H29B 109.6 . . ? 
C31 C30 C29 113.4(13) . . ? 
C31 C30 H30A 108.9 . . ? 
C29 C30 H30A 108.9 . . ? 
C31 C30 H30B 108.9 . . ? 
C29 C30 H30B 108.9 . . ? 
H30A C30 H30B 107.7 . . ? 
C30 C31 C32 111.1(11) . . ? 
C30 C31 H31A 109.4 . . ? 
C32 C31 H31A 109.4 . . ? 
C30 C31 H31B 109.4 . . ? 
C32 C31 H31B 109.4 . . ? 
H31A C31 H31B 108.0 . . ? 
O2 C29A C30A 123.5(8) . . ? 
O2 C29A H29C 106.5 . . ? 
C30A C29A H29C 106.5 . . ? 
O2 C29A H29D 106.5 . . ? 
C30A C29A H29D 106.5 . . ? 
H29C C29A H29D 106.5 . . ? 
C29A C30A C31A 93.0(7) . . ? 
C29A C30A H30C 113.1 . . ? 
C31A C30A H30C 113.1 . . ? 
C29A C30A H30D 113.1 . . ? 
C31A C30A H30D 113.1 . . ? 
H30C C30A H30D 110.5 . . ? 
C32 C31A C30A 93.9(6) . . ? 
C32 C31A H31C 112.9 . . ? 
C30A C31A H31C 112.9 . . ? 
C32 C31A H31D 112.9 . . ? 
C30A C31A H31D 112.9 . . ? 
H31C C31A H31D 110.4 . . ? 
O2 C32 C31A 110.2(6) . . ? 
O2 C32 C31 95.6(6) . . ? 
C31A C32 C31 31.1(5) . . ? 
O2 C32 H32A 112.6 . . ? 
C31A C32 H32A 81.6 . . ? 
C31 C32 H32A 112.6 . . ? 
O2 C32 H32B 112.6 . . ? 
C31A C32 H32B 125.6 . . ? 
C31 C32 H32B 112.6 . . ? 
H32A C32 H32B 110.1 . . ? 
O2 C32 H32C 109.6 . . ? 
C31A C32 H32C 109.6 . . ? 
C31 C32 H32C 140.4 . . ? 
H32A C32 H32C 29.6 . . ? 
H32B C32 H32C 85.8 . . ? 
O2 C32 H32D 109.6 . . ? 
C31A C32 H32D 109.6 . . ? 
C31 C32 H32D 90.4 . . ? 
H32A C32 H32D 128.7 . . ? 
H32B C32 H32D 23.4 . . ? 
H32C C32 H32D 108.1 . . ? 
O3 C33 C34A 106.6(5) . . ? 
O3 C33 C34 102.8(4) . . ? 
C34A C33 C34 26.5(5) . . ? 
O3 C33 H33A 111.2 . . ? 
C34A C33 H33A 85.8 . . ? 
C34 C33 H33A 111.2 . . ? 
O3 C33 H33B 111.2 . . ? 
C34A C33 H33B 129.7 . . ? 
C34 C33 H33B 111.2 . . ? 
H33A C33 H33B 109.1 . . ? 
O3 C33 H33C 110.4 . . ? 
C34A C33 H33C 110.4 . . ? 
C34 C33 H33C 133.6 . . ? 
H33A C33 H33C 26.1 . . ? 
H33B C33 H33C 86.2 . . ? 
O3 C33 H33D 110.4 . . ? 
C34A C33 H33D 110.4 . . ? 
C34 C33 H33D 88.2 . . ? 
H33A C33 H33D 128.0 . . ? 
H33B C33 H33D 24.5 . . ? 
H33C C33 H33D 108.6 . . ? 
C35 C34 C33 110.7(7) . . ? 
C35 C34 H34A 109.5 . . ? 
C33 C34 H34A 109.5 . . ? 
C35 C34 H34B 109.5 . . ? 
C33 C34 H34B 109.5 . . ? 
H34A C34 H34B 108.1 . . ? 
C34 C35 C36 103.7(7) . . ? 
O3 C36 C35 95.1(5) . . ? 
C35A C34A C33 105.3(8) . . ? 
C35A C34A H34C 110.7 . . ? 
C33 C34A H34C 110.7 . . ? 
C35A C34A H34D 110.7 . . ? 
C33 C34A H34D 110.7 . . ? 
H34C C34A H34D 108.8 . . ? 
C34A C35A C36A 106.0(8) . . ? 
C34A C35A H35A 110.5 . . ? 
C36A C35A H35A 110.5 . . ? 
C34A C35A H35B 110.5 . . ? 
C36A C35A H35B 110.5 . . ? 
H35A C35A H35B 108.7 . . ? 
C35A C36A O3 104.3(7) . . ? 
C35A C36A H36A 110.9 . . ? 
O3 C36A H36A 110.9 . . ? 
C35A C36A H36B 110.9 . . ? 
O3 C36A H36B 110.9 . . ? 
H36A C36A H36B 108.9 . . ? 
 
_diffrn_measured_fraction_theta_max    0.986 
_diffrn_reflns_theta_full              27.49 
_diffrn_measured_fraction_theta_full   0.986 
_refine_diff_density_max    0.690 
_refine_diff_density_min   -0.385 
_refine_diff_density_rms    0.065 
 

#=== END

data_fo3671 
 
_audit_creation_method            SHELXL-97 
_chemical_name_systematic 
? 
_chemical_name_common             ? 
_chemical_melting_point           ? 
_chemical_formula_moiety          'C32 H36 Ca O2 P2 Se4'
_chemical_formula_sum             'C32 H36 Ca O2 P2 Se4' 
_chemical_formula_weight          870.47 
 
loop_ 
 _atom_type_symbol 
 _atom_type_description 
 _atom_type_scat_dispersion_real 
 _atom_type_scat_dispersion_imag 
 _atom_type_scat_source 
 'C'  'C'   0.0033   0.0016 
 'International Tables Vol C Tables 4.2.6.8 and 6.1.1.4' 
 'H'  'H'   0.0000   0.0000 
 'International Tables Vol C Tables 4.2.6.8 and 6.1.1.4' 
 'O'  'O'   0.0106   0.0060 
 'International Tables Vol C Tables 4.2.6.8 and 6.1.1.4' 
 'P'  'P'   0.1023   0.0942 
 'International Tables Vol C Tables 4.2.6.8 and 6.1.1.4' 
 'Ca'  'Ca'   0.2262   0.3064 
 'International Tables Vol C Tables 4.2.6.8 and 6.1.1.4' 
 'Se'  'Se'  -0.0929   2.2259 
 'International Tables Vol C Tables 4.2.6.8 and 6.1.1.4' 
 
_symmetry_cell_setting            monoclinic 
_symmetry_space_group_name_H-M    'P 21'
_symmetry_space_group_name_Hall   'P 2yb'

 
loop_ 
 _symmetry_equiv_pos_as_xyz 
 'x, y, z' 
 '-x, y+1/2, -z' 
 
_cell_length_a                    8.8990(18) 
_cell_length_b                    26.290(5) 
_cell_length_c                    15.472(3) 
_cell_angle_alpha                 90.00 
_cell_angle_beta                  103.45(3) 
_cell_angle_gamma                 90.00 
_cell_volume                      3520.5(12) 
_cell_formula_units_Z             4 
_cell_measurement_temperature     183(2) 
_cell_measurement_reflns_used     19545 
_cell_measurement_theta_min       2.82
_cell_measurement_theta_max       27.47
 
_exptl_crystal_description        prism
_exptl_crystal_colour             colourless
_exptl_crystal_size_max           0.06 
_exptl_crystal_size_mid           0.06 
_exptl_crystal_size_min           0.04 
_exptl_crystal_density_meas       ? 
_exptl_crystal_density_diffrn     1.642 
_exptl_crystal_density_method     'not measured' 
_exptl_crystal_F_000              1720 
_exptl_absorpt_coefficient_mu     4.432 
_exptl_absorpt_correction_type    none
_exptl_absorpt_correction_T_min   ?
_exptl_absorpt_correction_T_max   ?
_exptl_absorpt_process_details    ? 
 
_exptl_special_details 
? 
 
_diffrn_ambient_temperature       183(2) 
_diffrn_radiation_wavelength      0.71073 
_diffrn_radiation_type            MoK\a 
_diffrn_radiation_source          'fine-focus sealed tube' 
_diffrn_radiation_monochromator   graphite 
_diffrn_measurement_device_type   KappaCCD 
_diffrn_measurement_method        'phi- + omega-scan'
_diffrn_detector_area_resol_mean  ? 
_diffrn_reflns_number             18541 
_diffrn_reflns_av_R_equivalents   0.0403 
_diffrn_reflns_av_sigmaI/netI     0.0635 
_diffrn_reflns_limit_h_min        -11 
_diffrn_reflns_limit_h_max        11 
_diffrn_reflns_limit_k_min        -28 
_diffrn_reflns_limit_k_max        32 
_diffrn_reflns_limit_l_min        -16 
_diffrn_reflns_limit_l_max        19 
_diffrn_reflns_theta_min          2.82 
_diffrn_reflns_theta_max          26.37 
_reflns_number_total              12241 
_reflns_number_gt                 10258 
_reflns_threshold_expression      >2sigma(I) 
 
_computing_data_collection        COLLECT
_computing_cell_refinement        DENZO
_computing_data_reduction         DENZO
_computing_structure_solution     'SHELXS-97 (Sheldrick, 2008)' 
_computing_structure_refinement   'SHELXL-97 (Sheldrick, 2008)' 
_computing_molecular_graphics     SHELXTL/PC
_computing_publication_material   SHELXL-97
 
_refine_special_details 
; 
 Refinement of F^2^ against ALL reflections.  The weighted R-factor wR and 
 goodness of fit S are based on F^2^, conventional R-factors R are based 
 on F, with F set to zero for negative F^2^. The threshold expression of 
 F^2^ > 2sigma(F^2^) is used only for calculating R-factors(gt) etc. and is 
 not relevant to the choice of reflections for refinement.  R-factors based 
 on F^2^ are statistically about twice as large as those based on F, and R- 
 factors based on ALL data will be even larger. 
; 
 
_refine_ls_structure_factor_coef  Fsqd  
_refine_ls_matrix_type            full 
_refine_ls_weighting_scheme       calc  
_refine_ls_weighting_details 
 'calc w=1/[\s^2^(Fo^2^)+(0.0308P)^2^+0.1824P] where P=(Fo^2^+2Fc^2^)/3' 
_atom_sites_solution_primary      direct 
_atom_sites_solution_secondary    difmap 
_atom_sites_solution_hydrogens    geom 
_refine_ls_hydrogen_treatment     constr
_refine_ls_extinction_method      none 
_refine_ls_extinction_coef        ? 
_refine_ls_abs_structure_details 
 'Flack H D (1983), Acta Cryst. A39, 876-881' 
_refine_ls_abs_structure_Flack    0.786(7) 
_refine_ls_number_reflns          12241 
_refine_ls_number_parameters      734 
_refine_ls_number_restraints      1 
_refine_ls_R_factor_all           0.0553 
_refine_ls_R_factor_gt            0.0389 
_refine_ls_wR_factor_ref          0.0817 
_refine_ls_wR_factor_gt           0.0770 
_refine_ls_goodness_of_fit_ref    1.038 
_refine_ls_restrained_S_all       1.038 
_refine_ls_shift/su_max           0.002 
_refine_ls_shift/su_mean          0.000 
 
loop_ 
 _atom_site_label 
 _atom_site_type_symbol 
 _atom_site_fract_x 
 _atom_site_fract_y 
 _atom_site_fract_z 
 _atom_site_U_iso_or_equiv 
 _atom_site_adp_type 
 _atom_site_occupancy 
 _atom_site_symmetry_multiplicity 
 _atom_site_calc_flag 
 _atom_site_refinement_flags 
 _atom_site_disorder_assembly 
 _atom_site_disorder_group 
Ca1A Ca 0.95376(13) -0.10335(4) -0.80193(9) 0.0305(3) Uani 1 1 d . . . 
Se1A Se 0.86928(6) -0.02276(2) -0.94012(4) 0.03217(14) Uani 1 1 d . . . 
Se2A Se 1.06049(7) -0.14260(2) -0.95785(4) 0.03579(15) Uani 1 1 d . . . 
Se3A Se 1.04587(8) -0.18934(2) -0.67755(5) 0.04594(18) Uani 1 1 d . . . 
Se4A Se 1.26725(6) -0.07552(2) -0.69233(4) 0.03430(14) Uani 1 1 d . . . 
P1A P 0.97623(15) -0.07181(6) -1.02074(11) 0.0300(3) Uani 1 1 d . . . 
P2A P 1.23981(16) -0.14232(6) -0.61642(11) 0.0307(3) Uani 1 1 d . . . 
O1A O 0.8256(4) -0.05420(16) -0.7142(3) 0.0393(10) Uani 1 1 d . . . 
O2A O 0.7124(4) -0.14346(17) -0.8411(3) 0.0407(10) Uani 1 1 d . . . 
C1A C 0.8411(6) -0.0849(2) -1.1268(4) 0.0347(14) Uani 1 1 d . . . 
C2A C 0.8913(8) -0.1124(3) -1.1911(5) 0.0444(16) Uani 1 1 d . . . 
H2AA H 0.9946 -0.1244 -1.1796 0.053 Uiso 1 1 calc R . . 
C3A C 0.7903(9) -0.1223(3) -1.2725(5) 0.0533(19) Uani 1 1 d . . . 
H3AA H 0.8245 -0.1406 -1.3173 0.064 Uiso 1 1 calc R . . 
C4A C 0.6409(9) -0.1052(3) -1.2873(5) 0.058(2) Uani 1 1 d . . . 
H4AA H 0.5712 -0.1119 -1.3427 0.070 Uiso 1 1 calc R . . 
C5A C 0.5918(8) -0.0791(3) -1.2244(5) 0.057(2) Uani 1 1 d . . . 
H5AA H 0.4869 -0.0687 -1.2351 0.068 Uiso 1 1 calc R . . 
C6A C 0.6911(7) -0.0673(3) -1.1450(5) 0.0444(16) Uani 1 1 d . . . 
H6AA H 0.6565 -0.0471 -1.1026 0.053 Uiso 1 1 calc R . . 
C7A C 1.1308(6) -0.0363(2) -1.0523(4) 0.0327(13) Uani 1 1 d . . . 
C8A C 1.2859(6) -0.0436(2) -1.0068(5) 0.0393(15) Uani 1 1 d . . . 
H8AA H 1.3116 -0.0695 -0.9631 0.047 Uiso 1 1 calc R . . 
C9A C 1.4001(6) -0.0133(3) -1.0255(5) 0.0444(17) Uani 1 1 d . . . 
H9AA H 1.5043 -0.0186 -0.9945 0.053 Uiso 1 1 calc R . . 
C10A C 1.3660(7) 0.0246(3) -1.0885(5) 0.0527(19) Uani 1 1 d . . . 
H10A H 1.4460 0.0451 -1.1014 0.063 Uiso 1 1 calc R . . 
C11A C 1.2138(7) 0.0325(3) -1.1327(5) 0.0534(19) Uani 1 1 d . . . 
H11A H 1.1891 0.0589 -1.1757 0.064 Uiso 1 1 calc R . . 
C12A C 1.0972(7) 0.0023(2) -1.1145(5) 0.0423(16) Uani 1 1 d . . . 
H12A H 0.9931 0.0081 -1.1452 0.051 Uiso 1 1 calc R . . 
C13A C 1.2213(6) -0.1243(2) -0.5056(4) 0.0305(13) Uani 1 1 d . . . 
C14A C 1.1920(7) -0.1616(3) -0.4477(5) 0.0427(16) Uani 1 1 d . . . 
H14A H 1.1840 -0.1962 -0.4662 0.051 Uiso 1 1 calc R . . 
C15A C 1.1743(8) -0.1490(3) -0.3634(6) 0.059(2) Uani 1 1 d . . . 
H15A H 1.1556 -0.1748 -0.3241 0.071 Uiso 1 1 calc R . . 
C16A C 1.1843(8) -0.0989(3) -0.3377(6) 0.057(2) Uani 1 1 d . . . 
H16A H 1.1695 -0.0898 -0.2808 0.069 Uiso 1 1 calc R . . 
C17A C 1.2150(7) -0.0625(3) -0.3924(5) 0.0505(18) Uani 1 1 d . . . 
H17A H 1.2233 -0.0282 -0.3729 0.061 Uiso 1 1 calc R . . 
C18A C 1.2346(6) -0.0738(2) -0.4760(4) 0.0371(14) Uani 1 1 d . . . 
H18A H 1.2569 -0.0475 -0.5133 0.045 Uiso 1 1 calc R . . 
C19A C 1.4177(7) -0.1791(2) -0.5945(4) 0.0407(15) Uani 1 1 d . . . 
C20A C 1.5530(7) -0.1542(3) -0.5526(5) 0.0483(18) Uani 1 1 d . . . 
H20A H 1.5489 -0.1198 -0.5343 0.058 Uiso 1 1 calc R . . 
C21A C 1.6942(9) -0.1793(4) -0.5372(6) 0.078(2) Uani 1 1 d . . . 
H21A H 1.7866 -0.1626 -0.5076 0.094 Uiso 1 1 calc R . . 
C22A C 1.6976(10) -0.2286(4) -0.5655(6) 0.078(2) Uani 1 1 d . . . 
H22A H 1.7945 -0.2453 -0.5581 0.094 Uiso 1 1 calc R . . 
C23A C 1.5689(11) -0.2539(4) -0.6033(5) 0.077(3) Uani 1 1 d . . . 
H23A H 1.5751 -0.2884 -0.6202 0.093 Uiso 1 1 calc R . . 
C24A C 1.4213(10) -0.2292(3) -0.6185(5) 0.063(2) Uani 1 1 d . . . 
H24A H 1.3290 -0.2470 -0.6444 0.076 Uiso 1 1 calc R . . 
C25A C 0.8776(7) -0.0524(2) -0.6187(4) 0.0427(16) Uani 1 1 d . . . 
H25A H 0.9737 -0.0321 -0.6010 0.051 Uiso 1 1 calc R . . 
H25B H 0.8979 -0.0871 -0.5940 0.051 Uiso 1 1 calc R . . 
C26A C 0.7493(8) -0.0278(2) -0.5859(5) 0.0452(16) Uani 1 1 d . . . 
H26A H 0.7899 -0.0089 -0.5301 0.054 Uiso 1 1 calc R . . 
H26B H 0.6736 -0.0534 -0.5758 0.054 Uiso 1 1 calc R . . 
C27A C 0.6776(7) 0.0078(3) -0.6606(5) 0.0452(16) Uani 1 1 d . . . 
H27A H 0.7374 0.0397 -0.6577 0.054 Uiso 1 1 calc R . . 
H27B H 0.5693 0.0159 -0.6598 0.054 Uiso 1 1 calc R . . 
C28A C 0.6866(7) -0.0236(3) -0.7420(5) 0.0510(17) Uani 1 1 d . . . 
H28A H 0.5943 -0.0456 -0.7604 0.061 Uiso 1 1 calc R . . 
H28B H 0.6940 -0.0012 -0.7923 0.061 Uiso 1 1 calc R . . 
C29A C 0.6349(7) -0.1666(3) -0.7785(5) 0.0517(18) Uani 1 1 d . . . 
H29A H 0.6270 -0.1423 -0.7309 0.062 Uiso 1 1 calc R . . 
H29B H 0.6918 -0.1971 -0.7510 0.062 Uiso 1 1 calc R . . 
C30A C 0.4760(7) -0.1810(3) -0.8322(5) 0.0521(18) Uani 1 1 d . . . 
H30A H 0.4426 -0.2140 -0.8121 0.063 Uiso 1 1 calc R . . 
H30B H 0.3990 -0.1547 -0.8272 0.063 Uiso 1 1 calc R . . 
C31A C 0.4959(7) -0.1847(3) -0.9258(5) 0.0448(16) Uani 1 1 d . . . 
H31A H 0.3972 -0.1781 -0.9694 0.054 Uiso 1 1 calc R . . 
H31B H 0.5349 -0.2186 -0.9376 0.054 Uiso 1 1 calc R . . 
C32A C 0.6133(7) -0.1437(3) -0.9296(4) 0.0436(15) Uani 1 1 d . . . 
H32A H 0.6728 -0.1520 -0.9745 0.052 Uiso 1 1 calc R . . 
H32B H 0.5625 -0.1103 -0.9442 0.052 Uiso 1 1 calc R . . 
Ca1B Ca 1.98777(12) -0.34748(4) -0.31727(8) 0.0300(3) Uani 1 1 d . . . 
Se1B Se 1.89055(6) -0.42728(2) -0.45663(4) 0.03100(14) Uani 1 1 d . . . 
Se2B Se 2.07546(6) -0.30670(2) -0.47680(4) 0.03345(14) Uani 1 1 d . . . 
Se3B Se 2.10062(7) -0.26160(2) -0.19343(4) 0.03729(15) Uani 1 1 d . . . 
Se4B Se 2.28084(7) -0.38509(2) -0.19639(5) 0.03787(15) Uani 1 1 d . . . 
P1B P 1.98815(15) -0.37733(5) -0.53994(10) 0.0270(3) Uani 1 1 d . . . 
P2B P 2.26839(16) -0.31549(5) -0.12398(11) 0.0294(3) Uani 1 1 d . . . 
O1B O 1.8502(4) -0.39666(14) -0.2371(3) 0.0359(10) Uani 1 1 d . . . 
O3B O 1.7522(4) -0.30389(16) -0.3476(3) 0.0403(10) Uani 1 1 d . . . 
C1B C 1.8461(6) -0.3629(2) -0.6427(4) 0.0299(13) Uani 1 1 d . . . 
C2B C 1.8765(7) -0.3252(2) -0.6989(5) 0.0420(16) Uani 1 1 d . . . 
H2BA H 1.9724 -0.3076 -0.6842 0.050 Uiso 1 1 calc R . . 
C3B C 1.7700(8) -0.3127(3) -0.7755(5) 0.0505(18) Uani 1 1 d . . . 
H3BA H 1.7925 -0.2870 -0.8137 0.061 Uiso 1 1 calc R . . 
C4B C 1.6271(8) -0.3385(3) -0.7971(5) 0.0508(19) Uani 1 1 d . . . 
H4BA H 1.5523 -0.3298 -0.8495 0.061 Uiso 1 1 calc R . . 
C5B C 1.5970(7) -0.3754(3) -0.7433(5) 0.0480(18) Uani 1 1 d . . . 
H5BA H 1.5007 -0.3928 -0.7585 0.058 Uiso 1 1 calc R . . 
C6B C 1.7048(7) -0.3888(3) -0.6654(5) 0.0438(16) Uani 1 1 d . . . 
H6BA H 1.6825 -0.4152 -0.6284 0.053 Uiso 1 1 calc R . . 
C7B C 2.1422(6) -0.4115(2) -0.5754(4) 0.0319(13) Uani 1 1 d . . . 
C8B C 2.2938(6) -0.4047(2) -0.5311(5) 0.0420(16) Uani 1 1 d . . . 
H8BA H 2.3190 -0.3797 -0.4858 0.050 Uiso 1 1 calc R . . 
C9B C 2.4109(7) -0.4341(3) -0.5521(5) 0.0498(18) Uani 1 1 d . . . 
H9BA H 2.5154 -0.4290 -0.5215 0.060 Uiso 1 1 calc R . . 
C10B C 2.3743(7) -0.4701(3) -0.6170(5) 0.0522(19) Uani 1 1 d . . . 
H10B H 2.4534 -0.4902 -0.6319 0.063 Uiso 1 1 calc R . . 
C11B C 2.2213(7) -0.4775(3) -0.6612(5) 0.0463(17) Uani 1 1 d . . . 
H11B H 2.1959 -0.5030 -0.7057 0.056 Uiso 1 1 calc R . . 
C12B C 2.1070(7) -0.4484(2) -0.6409(4) 0.0378(15) Uani 1 1 d . . . 
H12B H 2.0027 -0.4535 -0.6719 0.045 Uiso 1 1 calc R . . 
C13B C 2.2281(6) -0.3290(2) -0.0163(4) 0.0334(14) Uani 1 1 d . . . 
C14B C 2.2280(7) -0.3783(3) 0.0160(5) 0.0433(16) Uani 1 1 d . . . 
H14B H 2.2481 -0.4060 -0.0190 0.052 Uiso 1 1 calc R . . 
C15B C 2.1984(9) -0.3875(3) 0.0995(6) 0.063(2) Uani 1 1 d . . . 
H15B H 2.1961 -0.4213 0.1210 0.076 Uiso 1 1 calc R . . 
C16B C 2.1726(8) -0.3464(4) 0.1504(6) 0.063(2) Uani 1 1 d . . . 
H16B H 2.1550 -0.3524 0.2078 0.076 Uiso 1 1 calc R . . 
C17B C 2.1718(7) -0.2977(3) 0.1205(5) 0.0519(18) Uani 1 1 d . . . 
H17B H 2.1526 -0.2702 0.1563 0.062 Uiso 1 1 calc R . . 
C18B C 2.1999(7) -0.2886(3) 0.0353(4) 0.0406(16) Uani 1 1 d . . . 
H18B H 2.1994 -0.2548 0.0136 0.049 Uiso 1 1 calc R . . 
C19B C 2.4601(6) -0.2869(2) -0.0955(4) 0.0319(13) Uani 1 1 d . . . 
C20B C 2.5785(6) -0.3134(2) -0.0383(4) 0.0374(14) Uani 1 1 d . . . 
H20B H 2.5574 -0.3449 -0.0134 0.045 Uiso 1 1 calc R . . 
C21B C 2.7269(7) -0.2938(3) -0.0180(5) 0.0493(18) Uani 1 1 d . . . 
H21B H 2.8072 -0.3114 0.0219 0.059 Uiso 1 1 calc R . . 
C22B C 2.7584(7) -0.2488(3) -0.0555(5) 0.053(2) Uani 1 1 d . . . 
H22B H 2.8613 -0.2362 -0.0424 0.064 Uiso 1 1 calc R . . 
C23B C 2.6461(8) -0.2222(3) -0.1106(5) 0.0541(19) Uani 1 1 d . . . 
H23B H 2.6698 -0.1909 -0.1349 0.065 Uiso 1 1 calc R . . 
C24B C 2.4928(7) -0.2411(2) -0.1321(4) 0.0407(15) Uani 1 1 d . . . 
H24B H 2.4132 -0.2227 -0.1711 0.049 Uiso 1 1 calc R . . 
C25B C 1.8034(8) -0.3768(3) -0.1601(5) 0.0512(18) Uani 1 1 d . . . 
H25C H 1.7038 -0.3585 -0.1783 0.061 Uiso 1 1 calc R . . 
H25D H 1.8822 -0.3530 -0.1268 0.061 Uiso 1 1 calc R . . 
C26B C 1.7875(9) -0.4214(3) -0.1047(5) 0.0499(17) Uani 1 1 d . . . 
H26C H 1.7126 -0.4148 -0.0677 0.060 Uiso 1 1 calc R . . 
H26D H 1.8882 -0.4312 -0.0658 0.060 Uiso 1 1 calc R . . 
C27B C 1.7278(9) -0.4624(2) -0.1750(5) 0.0489(18) Uani 1 1 d . . . 
H27C H 1.7520 -0.4970 -0.1505 0.059 Uiso 1 1 calc R . . 
H27D H 1.6149 -0.4593 -0.1991 0.059 Uiso 1 1 calc R . . 
C28B C 1.8162(8) -0.4503(2) -0.2453(5) 0.0499(17) Uani 1 1 d . . . 
H28C H 1.9128 -0.4704 -0.2352 0.060 Uiso 1 1 calc R . . 
H28D H 1.7528 -0.4582 -0.3053 0.060 Uiso 1 1 calc R . . 
C29B C 1.7306(6) -0.2505(2) -0.3310(5) 0.0428(16) Uani 1 1 d . . . 
H29C H 1.7846 -0.2291 -0.3669 0.051 Uiso 1 1 calc R . . 
H29D H 1.7719 -0.2424 -0.2674 0.051 Uiso 1 1 calc R . . 
C30B C 1.5574(7) -0.2410(2) -0.3574(5) 0.0472(17) Uani 1 1 d . . . 
H30C H 1.5250 -0.2163 -0.3170 0.057 Uiso 1 1 calc R . . 
H30D H 1.5249 -0.2285 -0.4193 0.057 Uiso 1 1 calc R . . 
C31B C 1.4927(7) -0.2932(3) -0.3480(5) 0.0519(19) Uani 1 1 d . . . 
H31C H 1.3862 -0.2968 -0.3849 0.062 Uiso 1 1 calc R . . 
H31D H 1.4932 -0.3010 -0.2854 0.062 Uiso 1 1 calc R . . 
C32B C 1.6063(7) -0.3273(2) -0.3823(5) 0.0487(18) Uani 1 1 d . . . 
H32C H 1.6044 -0.3625 -0.3600 0.058 Uiso 1 1 calc R . . 
H32D H 1.5817 -0.3279 -0.4481 0.058 Uiso 1 1 calc R . . 
 
loop_ 
 _atom_site_aniso_label 
 _atom_site_aniso_U_11 
 _atom_site_aniso_U_22 
 _atom_site_aniso_U_33 
 _atom_site_aniso_U_23 
 _atom_site_aniso_U_13 
 _atom_site_aniso_U_12 
Ca1A 0.0310(5) 0.0301(6) 0.0295(7) 0.0016(5) 0.0053(5) -0.0007(5) 
Se1A 0.0339(3) 0.0292(3) 0.0348(4) 0.0020(3) 0.0108(3) 0.0035(2) 
Se2A 0.0387(3) 0.0297(3) 0.0393(4) 0.0015(3) 0.0095(3) 0.0060(2) 
Se3A 0.0527(4) 0.0289(3) 0.0490(5) 0.0076(3) -0.0028(3) -0.0091(3) 
Se4A 0.0333(3) 0.0304(3) 0.0378(4) 0.0086(3) 0.0056(3) -0.0022(2) 
P1A 0.0270(7) 0.0325(8) 0.0304(9) -0.0004(7) 0.0063(7) -0.0007(6) 
P2A 0.0330(7) 0.0248(7) 0.0339(9) 0.0066(7) 0.0071(7) 0.0034(6) 
O1A 0.037(2) 0.044(3) 0.034(3) -0.004(2) 0.002(2) 0.0120(18) 
O2A 0.037(2) 0.053(3) 0.029(3) 0.000(2) 0.003(2) -0.010(2) 
C1A 0.037(3) 0.035(3) 0.032(4) 0.001(3) 0.006(3) -0.008(3) 
C2A 0.053(4) 0.042(4) 0.037(4) -0.005(3) 0.009(3) -0.009(3) 
C3A 0.079(5) 0.049(4) 0.031(4) -0.014(3) 0.011(4) -0.014(4) 
C4A 0.073(5) 0.053(5) 0.038(5) 0.001(4) -0.007(4) -0.025(4) 
C5A 0.041(4) 0.078(5) 0.045(5) 0.005(4) -0.003(4) -0.008(4) 
C6A 0.040(3) 0.052(4) 0.038(4) 0.011(3) 0.001(3) -0.002(3) 
C7A 0.031(3) 0.032(3) 0.032(4) -0.002(3) 0.003(3) 0.000(2) 
C8A 0.033(3) 0.044(4) 0.043(4) 0.006(3) 0.013(3) 0.004(3) 
C9A 0.028(3) 0.051(4) 0.057(5) 0.002(3) 0.014(3) -0.006(3) 
C10A 0.041(4) 0.055(4) 0.068(6) -0.002(4) 0.025(4) -0.013(3) 
C11A 0.046(4) 0.062(5) 0.055(5) 0.008(4) 0.015(4) -0.012(3) 
C12A 0.037(3) 0.047(4) 0.043(4) 0.002(3) 0.009(3) -0.005(3) 
C13A 0.022(3) 0.032(3) 0.037(4) 0.007(3) 0.007(3) 0.005(2) 
C14A 0.044(3) 0.045(4) 0.040(4) 0.009(3) 0.011(3) 0.000(3) 
C15A 0.054(4) 0.071(6) 0.058(6) 0.018(4) 0.026(4) -0.002(4) 
C16A 0.044(4) 0.082(6) 0.049(5) -0.006(4) 0.016(4) 0.003(4) 
C17A 0.041(3) 0.055(4) 0.053(5) -0.007(4) 0.006(4) 0.007(3) 
C18A 0.035(3) 0.036(3) 0.039(4) 0.001(3) 0.006(3) 0.003(3) 
C19A 0.047(4) 0.046(4) 0.030(4) 0.008(3) 0.012(3) 0.014(3) 
C20A 0.040(3) 0.055(4) 0.053(5) 0.021(4) 0.017(3) 0.015(3) 
C21A 0.062(3) 0.125(6) 0.054(4) 0.038(4) 0.027(3) 0.049(4) 
C22A 0.062(3) 0.125(6) 0.054(4) 0.038(4) 0.027(3) 0.049(4) 
C23A 0.113(7) 0.077(6) 0.044(5) 0.013(4) 0.021(5) 0.061(5) 
C24A 0.090(5) 0.054(4) 0.042(5) 0.001(4) 0.009(4) 0.029(4) 
C25A 0.045(3) 0.035(3) 0.042(4) -0.003(3) -0.001(3) 0.006(3) 
C26A 0.058(4) 0.037(4) 0.041(4) -0.003(3) 0.012(3) -0.004(3) 
C27A 0.046(3) 0.047(4) 0.043(4) -0.003(3) 0.011(3) 0.007(3) 
C28A 0.048(4) 0.054(4) 0.047(4) -0.007(3) 0.003(3) 0.023(3) 
C29A 0.055(4) 0.062(4) 0.041(5) -0.001(3) 0.017(3) -0.017(3) 
C30A 0.040(3) 0.074(5) 0.044(5) -0.006(4) 0.014(3) -0.018(3) 
C31A 0.033(3) 0.057(4) 0.042(4) -0.013(3) 0.003(3) -0.007(3) 
C32A 0.044(3) 0.050(4) 0.033(4) -0.002(3) 0.002(3) -0.004(3) 
Ca1B 0.0296(5) 0.0290(6) 0.0302(7) -0.0033(5) 0.0047(5) -0.0014(5) 
Se1B 0.0341(3) 0.0277(3) 0.0318(4) -0.0025(2) 0.0088(3) -0.0034(2) 
Se2B 0.0347(3) 0.0266(3) 0.0379(4) -0.0024(3) 0.0059(3) -0.0037(2) 
Se3B 0.0425(3) 0.0269(3) 0.0378(4) -0.0038(3) -0.0002(3) 0.0027(2) 
Se4B 0.0397(3) 0.0296(3) 0.0400(4) -0.0085(3) 0.0005(3) 0.0044(3) 
P1B 0.0260(7) 0.0266(7) 0.0277(9) -0.0021(6) 0.0052(6) -0.0001(5) 
P2B 0.0303(7) 0.0280(8) 0.0285(9) -0.0029(6) 0.0042(7) -0.0039(6) 
O1B 0.045(2) 0.025(2) 0.041(3) -0.0022(18) 0.017(2) -0.0040(17) 
O3B 0.033(2) 0.035(2) 0.054(3) -0.008(2) 0.011(2) 0.0039(18) 
C1B 0.029(3) 0.034(3) 0.025(4) -0.006(2) 0.003(3) 0.004(2) 
C2B 0.037(3) 0.043(4) 0.043(4) 0.005(3) 0.004(3) 0.000(3) 
C3B 0.066(4) 0.051(4) 0.034(4) 0.015(3) 0.008(3) 0.021(4) 
C4B 0.047(4) 0.076(5) 0.023(4) 0.005(3) -0.005(3) 0.017(4) 
C5B 0.034(3) 0.059(5) 0.041(5) -0.015(4) -0.011(3) 0.005(3) 
C6B 0.042(3) 0.048(4) 0.042(4) -0.002(3) 0.010(3) 0.006(3) 
C7B 0.033(3) 0.035(3) 0.031(4) 0.005(3) 0.015(3) 0.008(2) 
C8B 0.031(3) 0.045(4) 0.051(5) -0.014(3) 0.012(3) 0.001(3) 
C9B 0.033(3) 0.055(4) 0.062(5) -0.011(4) 0.013(3) -0.005(3) 
C10B 0.041(4) 0.055(4) 0.064(5) -0.011(4) 0.020(4) 0.007(3) 
C11B 0.046(4) 0.048(4) 0.045(5) -0.014(3) 0.010(3) 0.006(3) 
C12B 0.033(3) 0.039(3) 0.035(4) -0.009(3) -0.006(3) 0.006(3) 
C13B 0.023(3) 0.044(4) 0.031(4) 0.000(3) 0.003(3) -0.008(2) 
C14B 0.047(3) 0.046(4) 0.037(4) 0.001(3) 0.010(3) -0.011(3) 
C15B 0.066(5) 0.068(5) 0.052(6) 0.016(4) 0.008(4) -0.017(4) 
C16B 0.052(4) 0.098(7) 0.041(5) 0.004(5) 0.015(4) -0.015(4) 
C17B 0.043(4) 0.072(5) 0.040(4) -0.005(4) 0.008(3) 0.002(3) 
C18B 0.042(3) 0.049(4) 0.034(4) 0.002(3) 0.015(3) -0.003(3) 
C19B 0.034(3) 0.034(3) 0.027(4) -0.012(3) 0.006(3) -0.006(2) 
C20B 0.033(3) 0.045(4) 0.034(4) -0.006(3) 0.007(3) -0.002(3) 
C21B 0.039(3) 0.064(5) 0.048(5) -0.019(4) 0.016(3) -0.004(3) 
C22B 0.040(3) 0.075(5) 0.048(5) -0.029(4) 0.015(3) -0.017(3) 
C23B 0.063(4) 0.048(4) 0.057(5) -0.021(4) 0.026(4) -0.024(4) 
C24B 0.050(4) 0.047(4) 0.028(4) -0.008(3) 0.014(3) -0.015(3) 
C25B 0.065(4) 0.043(4) 0.052(5) -0.009(3) 0.026(4) -0.010(3) 
C26B 0.066(4) 0.048(4) 0.038(4) -0.005(3) 0.016(4) -0.002(3) 
C27B 0.076(5) 0.031(3) 0.041(4) -0.003(3) 0.017(4) -0.015(3) 
C28B 0.070(4) 0.030(3) 0.053(5) 0.000(3) 0.021(4) -0.005(3) 
C29B 0.044(3) 0.033(3) 0.052(5) -0.008(3) 0.014(3) -0.003(3) 
C30B 0.044(3) 0.051(4) 0.044(5) 0.003(3) 0.005(3) 0.009(3) 
C31B 0.032(3) 0.066(5) 0.055(5) -0.006(4) 0.006(3) -0.004(3) 
C32B 0.033(3) 0.043(4) 0.063(5) -0.008(3) -0.004(3) -0.001(3) 
 
_geom_special_details 
; 
 All esds (except the esd in the dihedral angle between two l.s. planes) 
 are estimated using the full covariance matrix.  The cell esds are taken 
 into account individually in the estimation of esds in distances, angles 
 and torsion angles; correlations between esds in cell parameters are only 
 used when they are defined by crystal symmetry.  An approximate (isotropic) 
 treatment of cell esds is used for estimating esds involving l.s. planes. 
; 
 
loop_ 
 _geom_bond_atom_site_label_1 
 _geom_bond_atom_site_label_2 
 _geom_bond_distance 
 _geom_bond_site_symmetry_2 
 _geom_bond_publ_flag 
Ca1A O2A 2.343(4) . ? 
Ca1A O1A 2.352(4) . ? 
Ca1A Se3A 2.9583(15) . ? 
Ca1A Se2A 2.9754(15) . ? 
Ca1A Se1A 2.9795(15) . ? 
Ca1A Se4A 2.9988(16) . ? 
Se1A P1A 2.1626(16) . ? 
Se2A P1A 2.1525(17) . ? 
Se3A P2A 2.1544(17) . ? 
Se4A P2A 2.1581(16) . ? 
P1A C7A 1.820(6) . ? 
P1A C1A 1.828(7) . ? 
P2A C19A 1.819(6) . ? 
P2A C13A 1.822(6) . ? 
O1A C25A 1.443(8) . ? 
O1A C28A 1.454(7) . ? 
O2A C32A 1.446(7) . ? 
O2A C29A 1.447(8) . ? 
C1A C6A 1.378(8) . ? 
C1A C2A 1.384(9) . ? 
C2A C3A 1.392(9) . ? 
C2A H2AA 0.9500 . ? 
C3A C4A 1.371(10) . ? 
C3A H3AA 0.9500 . ? 
C4A C5A 1.344(11) . ? 
C4A H4AA 0.9500 . ? 
C5A C6A 1.371(10) . ? 
C5A H5AA 0.9500 . ? 
C6A H6AA 0.9500 . ? 
C7A C12A 1.383(9) . ? 
C7A C8A 1.409(8) . ? 
C8A C9A 1.374(8) . ? 
C8A H8AA 0.9500 . ? 
C9A C10A 1.377(10) . ? 
C9A H9AA 0.9500 . ? 
C10A C11A 1.384(9) . ? 
C10A H10A 0.9500 . ? 
C11A C12A 1.387(9) . ? 
C11A H11A 0.9500 . ? 
C12A H12A 0.9500 . ? 
C13A C14A 1.393(9) . ? 
C13A C18A 1.401(8) . ? 
C14A C15A 1.390(11) . ? 
C14A H14A 0.9500 . ? 
C15A C16A 1.374(11) . ? 
C15A H15A 0.9500 . ? 
C16A C17A 1.347(11) . ? 
C16A H16A 0.9500 . ? 
C17A C18A 1.376(10) . ? 
C17A H17A 0.9500 . ? 
C18A H18A 0.9500 . ? 
C19A C24A 1.370(9) . ? 
C19A C20A 1.392(9) . ? 
C20A C21A 1.390(9) . ? 
C20A H20A 0.9500 . ? 
C21A C22A 1.370(14) . ? 
C21A H21A 0.9500 . ? 
C22A C23A 1.336(13) . ? 
C22A H22A 0.9500 . ? 
C23A C24A 1.434(10) . ? 
C23A H23A 0.9500 . ? 
C24A H24A 0.9500 . ? 
C25A C26A 1.499(9) . ? 
C25A H25A 0.9900 . ? 
C25A H25B 0.9900 . ? 
C26A C27A 1.508(9) . ? 
C26A H26A 0.9900 . ? 
C26A H26B 0.9900 . ? 
C27A C28A 1.523(9) . ? 
C27A H27A 0.9900 . ? 
C27A H27B 0.9900 . ? 
C28A H28A 0.9900 . ? 
C28A H28B 0.9900 . ? 
C29A C30A 1.512(9) . ? 
C29A H29A 0.9900 . ? 
C29A H29B 0.9900 . ? 
C30A C31A 1.503(9) . ? 
C30A H30A 0.9900 . ? 
C30A H30B 0.9900 . ? 
C31A C32A 1.512(9) . ? 
C31A H31A 0.9900 . ? 
C31A H31B 0.9900 . ? 
C32A H32A 0.9900 . ? 
C32A H32B 0.9900 . ? 
Ca1B O1B 2.327(4) . ? 
Ca1B O3B 2.339(4) . ? 
Ca1B Se2B 2.9575(15) . ? 
Ca1B Se3B 2.9803(14) . ? 
Ca1B Se1B 2.9885(14) . ? 
Ca1B Se4B 3.0014(16) . ? 
Se1B P1B 2.1589(16) . ? 
Se2B P1B 2.1571(15) . ? 
Se3B P2B 2.1552(16) . ? 
Se4B P2B 2.1617(16) . ? 
P1B C1B 1.826(6) . ? 
P1B C7B 1.827(5) . ? 
P2B C13B 1.818(6) . ? 
P2B C19B 1.823(6) . ? 
O1B C28B 1.441(7) . ? 
O1B C25B 1.448(8) . ? 
O3B C32B 1.424(7) . ? 
O3B C29B 1.449(7) . ? 
C1B C2B 1.387(9) . ? 
C1B C6B 1.401(8) . ? 
C2B C3B 1.374(9) . ? 
C2B H2BA 0.9500 . ? 
C3B C4B 1.410(10) . ? 
C3B H3BA 0.9500 . ? 
C4B C5B 1.347(10) . ? 
C4B H4BA 0.9500 . ? 
C5B C6B 1.399(9) . ? 
C5B H5BA 0.9500 . ? 
C6B H6BA 0.9500 . ? 
C7B C8B 1.376(8) . ? 
C7B C12B 1.384(8) . ? 
C8B C9B 1.394(9) . ? 
C8B H8BA 0.9500 . ? 
C9B C10B 1.364(10) . ? 
C9B H9BA 0.9500 . ? 
C10B C11B 1.387(9) . ? 
C10B H10B 0.9500 . ? 
C11B C12B 1.367(8) . ? 
C11B H11B 0.9500 . ? 
C12B H12B 0.9500 . ? 
C13B C18B 1.386(9) . ? 
C13B C14B 1.390(8) . ? 
C14B C15B 1.398(10) . ? 
C14B H14B 0.9500 . ? 
C15B C16B 1.388(12) . ? 
C15B H15B 0.9500 . ? 
C16B C17B 1.358(12) . ? 
C16B H16B 0.9500 . ? 
C17B C18B 1.419(10) . ? 
C17B H17B 0.9500 . ? 
C18B H18B 0.9500 . ? 
C19B C24B 1.389(9) . ? 
C19B C20B 1.395(8) . ? 
C20B C21B 1.384(8) . ? 
C20B H20B 0.9500 . ? 
C21B C22B 1.375(10) . ? 
C21B H21B 0.9500 . ? 
C22B C23B 1.347(10) . ? 
C22B H22B 0.9500 . ? 
C23B C24B 1.417(9) . ? 
C23B H23B 0.9500 . ? 
C24B H24B 0.9500 . ? 
C25B C26B 1.479(10) . ? 
C25B H25C 0.9900 . ? 
C25B H25D 0.9900 . ? 
C26B C27B 1.534(10) . ? 
C26B H26C 0.9900 . ? 
C26B H26D 0.9900 . ? 
C27B C28B 1.517(9) . ? 
C27B H27C 0.9900 . ? 
C27B H27D 0.9900 . ? 
C28B H28C 0.9900 . ? 
C28B H28D 0.9900 . ? 
C29B C30B 1.521(8) . ? 
C29B H29C 0.9900 . ? 
C29B H29D 0.9900 . ? 
C30B C31B 1.509(9) . ? 
C30B H30C 0.9900 . ? 
C30B H30D 0.9900 . ? 
C31B C32B 1.534(9) . ? 
C31B H31C 0.9900 . ? 
C31B H31D 0.9900 . ? 
C32B H32C 0.9900 . ? 
C32B H32D 0.9900 . ? 
 
loop_ 
 _geom_angle_atom_site_label_1 
 _geom_angle_atom_site_label_2 
 _geom_angle_atom_site_label_3 
 _geom_angle 
 _geom_angle_site_symmetry_1 
 _geom_angle_site_symmetry_3 
 _geom_angle_publ_flag 
O2A Ca1A O1A 81.83(15) . . ? 
O2A Ca1A Se3A 85.57(12) . . ? 
O1A Ca1A Se3A 98.19(12) . . ? 
O2A Ca1A Se2A 94.63(11) . . ? 
O1A Ca1A Se2A 161.35(12) . . ? 
Se3A Ca1A Se2A 99.79(4) . . ? 
O2A Ca1A Se1A 94.09(12) . . ? 
O1A Ca1A Se1A 87.04(11) . . ? 
Se3A Ca1A Se1A 174.65(5) . . ? 
Se2A Ca1A Se1A 74.91(4) . . ? 
O2A Ca1A Se4A 158.83(12) . . ? 
O1A Ca1A Se4A 92.97(11) . . ? 
Se3A Ca1A Se4A 74.81(4) . . ? 
Se2A Ca1A Se4A 96.47(4) . . ? 
Se1A Ca1A Se4A 106.18(4) . . ? 
O2A Ca1A P2A 121.73(12) . . ? 
O1A Ca1A P2A 92.58(11) . . ? 
Se3A Ca1A P2A 37.63(3) . . ? 
Se2A Ca1A P2A 104.70(4) . . ? 
Se1A Ca1A P2A 143.78(5) . . ? 
Se4A Ca1A P2A 37.63(3) . . ? 
O2A Ca1A P1A 96.35(12) . . ? 
O1A Ca1A P1A 124.52(12) . . ? 
Se3A Ca1A P1A 137.15(5) . . ? 
Se2A Ca1A P1A 37.37(3) . . ? 
Se1A Ca1A P1A 37.56(3) . . ? 
Se4A Ca1A P1A 103.41(5) . . ? 
P2A Ca1A P1A 131.17(5) . . ? 
P1A Se1A Ca1A 85.32(5) . . ? 
P1A Se2A Ca1A 85.60(5) . . ? 
P2A Se3A Ca1A 85.39(5) . . ? 
P2A Se4A Ca1A 84.32(5) . . ? 
C7A P1A C1A 103.6(3) . . ? 
C7A P1A Se2A 111.03(19) . . ? 
C1A P1A Se2A 109.3(2) . . ? 
C7A P1A Se1A 108.1(2) . . ? 
C1A P1A Se1A 110.1(2) . . ? 
Se2A P1A Se1A 114.12(8) . . ? 
C7A P1A Ca1A 126.3(2) . . ? 
C1A P1A Ca1A 130.07(19) . . ? 
Se2A P1A Ca1A 57.03(4) . . ? 
Se1A P1A Ca1A 57.12(5) . . ? 
C19A P2A C13A 103.2(3) . . ? 
C19A P2A Se3A 110.5(2) . . ? 
C13A P2A Se3A 108.89(18) . . ? 
C19A P2A Se4A 109.3(2) . . ? 
C13A P2A Se4A 110.30(19) . . ? 
Se3A P2A Se4A 114.11(8) . . ? 
C19A P2A Ca1A 137.8(2) . . ? 
C13A P2A Ca1A 119.05(17) . . ? 
Se3A P2A Ca1A 56.98(5) . . ? 
Se4A P2A Ca1A 58.05(4) . . ? 
C25A O1A C28A 109.4(4) . . ? 
C25A O1A Ca1A 121.8(3) . . ? 
C28A O1A Ca1A 128.8(4) . . ? 
C32A O2A C29A 110.6(4) . . ? 
C32A O2A Ca1A 124.6(3) . . ? 
C29A O2A Ca1A 124.6(4) . . ? 
C6A C1A C2A 119.2(6) . . ? 
C6A C1A P1A 121.6(5) . . ? 
C2A C1A P1A 119.2(5) . . ? 
C1A C2A C3A 120.0(7) . . ? 
C1A C2A H2AA 120.0 . . ? 
C3A C2A H2AA 120.0 . . ? 
C4A C3A C2A 119.1(7) . . ? 
C4A C3A H3AA 120.4 . . ? 
C2A C3A H3AA 120.4 . . ? 
C5A C4A C3A 120.8(7) . . ? 
C5A C4A H4AA 119.6 . . ? 
C3A C4A H4AA 119.6 . . ? 
C4A C5A C6A 120.9(7) . . ? 
C4A C5A H5AA 119.5 . . ? 
C6A C5A H5AA 119.5 . . ? 
C5A C6A C1A 119.9(7) . . ? 
C5A C6A H6AA 120.1 . . ? 
C1A C6A H6AA 120.1 . . ? 
C12A C7A C8A 118.4(5) . . ? 
C12A C7A P1A 120.5(4) . . ? 
C8A C7A P1A 120.6(5) . . ? 
C9A C8A C7A 120.2(6) . . ? 
C9A C8A H8AA 119.9 . . ? 
C7A C8A H8AA 119.9 . . ? 
C8A C9A C10A 121.1(6) . . ? 
C8A C9A H9AA 119.4 . . ? 
C10A C9A H9AA 119.4 . . ? 
C9A C10A C11A 119.2(6) . . ? 
C9A C10A H10A 120.4 . . ? 
C11A C10A H10A 120.4 . . ? 
C10A C11A C12A 120.4(7) . . ? 
C10A C11A H11A 119.8 . . ? 
C12A C11A H11A 119.8 . . ? 
C7A C12A C11A 120.7(6) . . ? 
C7A C12A H12A 119.6 . . ? 
C11A C12A H12A 119.6 . . ? 
C14A C13A C18A 118.1(6) . . ? 
C14A C13A P2A 119.6(5) . . ? 
C18A C13A P2A 122.4(5) . . ? 
C15A C14A C13A 121.0(7) . . ? 
C15A C14A H14A 119.5 . . ? 
C13A C14A H14A 119.5 . . ? 
C16A C15A C14A 119.1(7) . . ? 
C16A C15A H15A 120.5 . . ? 
C14A C15A H15A 120.5 . . ? 
C17A C16A C15A 120.5(8) . . ? 
C17A C16A H16A 119.8 . . ? 
C15A C16A H16A 119.8 . . ? 
C16A C17A C18A 121.8(7) . . ? 
C16A C17A H17A 119.1 . . ? 
C18A C17A H17A 119.1 . . ? 
C17A C18A C13A 119.5(6) . . ? 
C17A C18A H18A 120.3 . . ? 
C13A C18A H18A 120.3 . . ? 
C24A C19A C20A 120.4(6) . . ? 
C24A C19A P2A 122.3(6) . . ? 
C20A C19A P2A 117.2(5) . . ? 
C21A C20A C19A 120.4(8) . . ? 
C21A C20A H20A 119.8 . . ? 
C19A C20A H20A 119.8 . . ? 
C22A C21A C20A 118.7(9) . . ? 
C22A C21A H21A 120.6 . . ? 
C20A C21A H21A 120.6 . . ? 
C23A C22A C21A 122.0(8) . . ? 
C23A C22A H22A 119.0 . . ? 
C21A C22A H22A 119.0 . . ? 
C22A C23A C24A 120.4(8) . . ? 
C22A C23A H23A 119.8 . . ? 
C24A C23A H23A 119.8 . . ? 
C19A C24A C23A 117.9(8) . . ? 
C19A C24A H24A 121.0 . . ? 
C23A C24A H24A 121.0 . . ? 
O1A C25A C26A 105.8(5) . . ? 
O1A C25A H25A 110.6 . . ? 
C26A C25A H25A 110.6 . . ? 
O1A C25A H25B 110.6 . . ? 
C26A C25A H25B 110.6 . . ? 
H25A C25A H25B 108.7 . . ? 
C25A C26A C27A 103.2(5) . . ? 
C25A C26A H26A 111.1 . . ? 
C27A C26A H26A 111.1 . . ? 
C25A C26A H26B 111.1 . . ? 
C27A C26A H26B 111.1 . . ? 
H26A C26A H26B 109.1 . . ? 
C26A C27A C28A 101.7(5) . . ? 
C26A C27A H27A 111.4 . . ? 
C28A C27A H27A 111.4 . . ? 
C26A C27A H27B 111.4 . . ? 
C28A C27A H27B 111.4 . . ? 
H27A C27A H27B 109.3 . . ? 
O1A C28A C27A 105.1(5) . . ? 
O1A C28A H28A 110.7 . . ? 
C27A C28A H28A 110.7 . . ? 
O1A C28A H28B 110.7 . . ? 
C27A C28A H28B 110.7 . . ? 
H28A C28A H28B 108.8 . . ? 
O2A C29A C30A 105.5(5) . . ? 
O2A C29A H29A 110.6 . . ? 
C30A C29A H29A 110.6 . . ? 
O2A C29A H29B 110.6 . . ? 
C30A C29A H29B 110.6 . . ? 
H29A C29A H29B 108.8 . . ? 
C31A C30A C29A 103.9(5) . . ? 
C31A C30A H30A 111.0 . . ? 
C29A C30A H30A 111.0 . . ? 
C31A C30A H30B 111.0 . . ? 
C29A C30A H30B 111.0 . . ? 
H30A C30A H30B 109.0 . . ? 
C30A C31A C32A 103.2(5) . . ? 
C30A C31A H31A 111.1 . . ? 
C32A C31A H31A 111.1 . . ? 
C30A C31A H31B 111.1 . . ? 
C32A C31A H31B 111.1 . . ? 
H31A C31A H31B 109.1 . . ? 
O2A C32A C31A 104.0(5) . . ? 
O2A C32A H32A 111.0 . . ? 
C31A C32A H32A 111.0 . . ? 
O2A C32A H32B 111.0 . . ? 
C31A C32A H32B 111.0 . . ? 
H32A C32A H32B 109.0 . . ? 
O1B Ca1B O3B 79.69(15) . . ? 
O1B Ca1B Se2B 156.92(12) . . ? 
O3B Ca1B Se2B 93.05(12) . . ? 
O1B Ca1B Se3B 102.62(11) . . ? 
O3B Ca1B Se3B 84.83(11) . . ? 
Se2B Ca1B Se3B 98.46(4) . . ? 
O1B Ca1B Se1B 83.96(11) . . ? 
O3B Ca1B Se1B 95.96(11) . . ? 
Se2B Ca1B Se1B 74.97(4) . . ? 
Se3B Ca1B Se1B 173.40(5) . . ? 
O1B Ca1B Se4B 88.48(11) . . ? 
O3B Ca1B Se4B 153.47(12) . . ? 
Se2B Ca1B Se4B 106.25(4) . . ? 
Se3B Ca1B Se4B 74.63(4) . . ? 
Se1B Ca1B Se4B 106.39(4) . . ? 
O1B Ca1B P2B 92.12(11) . . ? 
O3B Ca1B P2B 118.58(12) . . ? 
Se2B Ca1B P2B 110.45(4) . . ? 
Se3B Ca1B P2B 37.55(3) . . ? 
Se1B Ca1B P2B 144.01(5) . . ? 
Se4B Ca1B P2B 37.63(3) . . ? 
O1B Ca1B P1B 121.08(11) . . ? 
O3B Ca1B P1B 96.75(12) . . ? 
Se2B Ca1B P1B 37.50(3) . . ? 
Se3B Ca1B P1B 135.92(5) . . ? 
Se1B Ca1B P1B 37.49(3) . . ? 
Se4B Ca1B P1B 109.67(5) . . ? 
P2B Ca1B P1B 135.99(5) . . ? 
P1B Se1B Ca1B 85.10(5) . . ? 
P1B Se2B Ca1B 85.91(5) . . ? 
P2B Se3B Ca1B 85.03(5) . . ? 
P2B Se4B Ca1B 84.39(5) . . ? 
C1B P1B C7B 104.9(3) . . ? 
C1B P1B Se2B 108.60(19) . . ? 
C7B P1B Se2B 110.1(2) . . ? 
C1B P1B Se1B 110.67(19) . . ? 
C7B P1B Se1B 108.31(19) . . ? 
Se2B P1B Se1B 113.94(7) . . ? 
C1B P1B Ca1B 130.17(18) . . ? 
C7B P1B Ca1B 125.0(2) . . ? 
Se2B P1B Ca1B 56.58(4) . . ? 
Se1B P1B Ca1B 57.41(4) . . ? 
C13B P2B C19B 103.4(3) . . ? 
C13B P2B Se3B 108.9(2) . . ? 
C19B P2B Se3B 110.5(2) . . ? 
C13B P2B Se4B 110.8(2) . . ? 
C19B P2B Se4B 108.49(18) . . ? 
Se3B P2B Se4B 114.27(8) . . ? 
C13B P2B Ca1B 118.63(18) . . ? 
C19B P2B Ca1B 138.0(2) . . ? 
Se3B P2B Ca1B 57.43(5) . . ? 
Se4B P2B Ca1B 57.97(4) . . ? 
C28B O1B C25B 109.3(5) . . ? 
C28B O1B Ca1B 128.5(4) . . ? 
C25B O1B Ca1B 121.7(3) . . ? 
C32B O3B C29B 109.8(4) . . ? 
C32B O3B Ca1B 124.1(3) . . ? 
C29B O3B Ca1B 126.1(3) . . ? 
C2B C1B C6B 119.0(6) . . ? 
C2B C1B P1B 119.9(4) . . ? 
C6B C1B P1B 121.1(5) . . ? 
C3B C2B C1B 121.0(6) . . ? 
C3B C2B H2BA 119.5 . . ? 
C1B C2B H2BA 119.5 . . ? 
C2B C3B C4B 119.6(7) . . ? 
C2B C3B H3BA 120.2 . . ? 
C4B C3B H3BA 120.2 . . ? 
C5B C4B C3B 119.9(6) . . ? 
C5B C4B H4BA 120.1 . . ? 
C3B C4B H4BA 120.1 . . ? 
C4B C5B C6B 121.2(6) . . ? 
C4B C5B H5BA 119.4 . . ? 
C6B C5B H5BA 119.4 . . ? 
C5B C6B C1B 119.3(6) . . ? 
C5B C6B H6BA 120.3 . . ? 
C1B C6B H6BA 120.3 . . ? 
C8B C7B C12B 119.0(5) . . ? 
C8B C7B P1B 120.2(5) . . ? 
C12B C7B P1B 120.5(4) . . ? 
C7B C8B C9B 120.8(6) . . ? 
C7B C8B H8BA 119.6 . . ? 
C9B C8B H8BA 119.6 . . ? 
C10B C9B C8B 119.5(6) . . ? 
C10B C9B H9BA 120.2 . . ? 
C8B C9B H9BA 120.2 . . ? 
C9B C10B C11B 119.9(6) . . ? 
C9B C10B H10B 120.0 . . ? 
C11B C10B H10B 120.0 . . ? 
C12B C11B C10B 120.4(6) . . ? 
C12B C11B H11B 119.8 . . ? 
C10B C11B H11B 119.8 . . ? 
C11B C12B C7B 120.4(6) . . ? 
C11B C12B H12B 119.8 . . ? 
C7B C12B H12B 119.8 . . ? 
C18B C13B C14B 119.5(6) . . ? 
C18B C13B P2B 118.7(5) . . ? 
C14B C13B P2B 121.9(5) . . ? 
C13B C14B C15B 120.7(7) . . ? 
C13B C14B H14B 119.7 . . ? 
C15B C14B H14B 119.7 . . ? 
C16B C15B C14B 118.7(7) . . ? 
C16B C15B H15B 120.6 . . ? 
C14B C15B H15B 120.6 . . ? 
C17B C16B C15B 121.9(8) . . ? 
C17B C16B H16B 119.0 . . ? 
C15B C16B H16B 119.0 . . ? 
C16B C17B C18B 119.1(7) . . ? 
C16B C17B H17B 120.4 . . ? 
C18B C17B H17B 120.4 . . ? 
C13B C18B C17B 120.1(6) . . ? 
C13B C18B H18B 120.0 . . ? 
C17B C18B H18B 120.0 . . ? 
C24B C19B C20B 119.6(5) . . ? 
C24B C19B P2B 122.1(5) . . ? 
C20B C19B P2B 118.2(4) . . ? 
C21B C20B C19B 119.8(6) . . ? 
C21B C20B H20B 120.1 . . ? 
C19B C20B H20B 120.1 . . ? 
C22B C21B C20B 120.2(7) . . ? 
C22B C21B H21B 119.9 . . ? 
C20B C21B H21B 119.9 . . ? 
C23B C22B C21B 121.3(6) . . ? 
C23B C22B H22B 119.4 . . ? 
C21B C22B H22B 119.4 . . ? 
C22B C23B C24B 119.9(7) . . ? 
C22B C23B H23B 120.0 . . ? 
C24B C23B H23B 120.0 . . ? 
C19B C24B C23B 119.3(7) . . ? 
C19B C24B H24B 120.4 . . ? 
C23B C24B H24B 120.4 . . ? 
O1B C25B C26B 105.9(5) . . ? 
O1B C25B H25C 110.5 . . ? 
C26B C25B H25C 110.5 . . ? 
O1B C25B H25D 110.5 . . ? 
C26B C25B H25D 110.5 . . ? 
H25C C25B H25D 108.7 . . ? 
C25B C26B C27B 102.1(6) . . ? 
C25B C26B H26C 111.3 . . ? 
C27B C26B H26C 111.3 . . ? 
C25B C26B H26D 111.3 . . ? 
C27B C26B H26D 111.3 . . ? 
H26C C26B H26D 109.2 . . ? 
C28B C27B C26B 102.1(5) . . ? 
C28B C27B H27C 111.4 . . ? 
C26B C27B H27C 111.4 . . ? 
C28B C27B H27D 111.4 . . ? 
C26B C27B H27D 111.4 . . ? 
H27C C27B H27D 109.2 . . ? 
O1B C28B C27B 105.9(5) . . ? 
O1B C28B H28C 110.5 . . ? 
C27B C28B H28C 110.5 . . ? 
O1B C28B H28D 110.5 . . ? 
C27B C28B H28D 110.5 . . ? 
H28C C28B H28D 108.7 . . ? 
O3B C29B C30B 106.2(5) . . ? 
O3B C29B H29C 110.5 . . ? 
C30B C29B H29C 110.5 . . ? 
O3B C29B H29D 110.5 . . ? 
C30B C29B H29D 110.5 . . ? 
H29C C29B H29D 108.7 . . ? 
C31B C30B C29B 102.2(5) . . ? 
C31B C30B H30C 111.3 . . ? 
C29B C30B H30C 111.3 . . ? 
C31B C30B H30D 111.3 . . ? 
C29B C30B H30D 111.3 . . ? 
H30C C30B H30D 109.2 . . ? 
C30B C31B C32B 101.6(5) . . ? 
C30B C31B H31C 111.5 . . ? 
C32B C31B H31C 111.5 . . ? 
C30B C31B H31D 111.5 . . ? 
C32B C31B H31D 111.5 . . ? 
H31C C31B H31D 109.3 . . ? 
O3B C32B C31B 103.6(5) . . ? 
O3B C32B H32C 111.1 . . ? 
C31B C32B H32C 111.1 . . ? 
O3B C32B H32D 111.1 . . ? 
C31B C32B H32D 111.1 . . ? 
H32C C32B H32D 109.0 . . ? 
 
_diffrn_measured_fraction_theta_max    0.974 
_diffrn_reflns_theta_full              26.37 
_diffrn_measured_fraction_theta_full   0.974 
_refine_diff_density_max    0.398 
_refine_diff_density_min   -0.518 
_refine_diff_density_rms    0.087 
 

#=== END

data_FO3890 
 
_audit_creation_method            SHELXL-97 
_chemical_name_systematic 
? 
_chemical_name_common             ? 
_chemical_melting_point           ? 
_chemical_formula_moiety          'C36 H44 O3 P2 S4 Sr' 
_chemical_formula_sum             'C36 H44 O3 P2 S4 Sr' 
_chemical_formula_weight          802.51 
 
loop_ 
 _atom_type_symbol 
 _atom_type_description 
 _atom_type_scat_dispersion_real 
 _atom_type_scat_dispersion_imag 
 _atom_type_scat_source 
 'C'  'C'   0.0033   0.0016 
 'International Tables Vol C Tables 4.2.6.8 and 6.1.1.4' 
 'H'  'H'   0.0000   0.0000 
 'International Tables Vol C Tables 4.2.6.8 and 6.1.1.4' 
 'O'  'O'   0.0106   0.0060 
 'International Tables Vol C Tables 4.2.6.8 and 6.1.1.4' 
 'P'  'P'   0.1023   0.0942 
 'International Tables Vol C Tables 4.2.6.8 and 6.1.1.4' 
 'S'  'S'   0.1246   0.1234 
 'International Tables Vol C Tables 4.2.6.8 and 6.1.1.4' 
 'Sr'  'Sr'  -1.5307   3.2498 
 'International Tables Vol C Tables 4.2.6.8 and 6.1.1.4' 
 
_symmetry_cell_setting            monoclinic
_symmetry_space_group_name_H-M    'P 21'
_symmetry_space_group_name_Hall   'P 2yb'
 
loop_ 
 _symmetry_equiv_pos_as_xyz 
 'x, y, z' 
 '-x, y+1/2, -z' 
 
_cell_length_a                    15.7762(4) 
_cell_length_b                    13.1205(5) 
_cell_length_c                    20.0254(6) 
_cell_angle_alpha                 90.00 
_cell_angle_beta                  108.406(2) 
_cell_angle_gamma                 90.00 
_cell_volume                      3933.0(2) 
_cell_formula_units_Z             4 
_cell_measurement_temperature     183(2) 
_cell_measurement_reflns_used     28266 
_cell_measurement_theta_min       1.36
_cell_measurement_theta_max       27.50
 
_exptl_crystal_description        prism 
_exptl_crystal_colour             colourless
_exptl_crystal_size_max           0.05 
_exptl_crystal_size_mid           0.05 
_exptl_crystal_size_min           0.04 
_exptl_crystal_density_meas       ? 
_exptl_crystal_density_diffrn     1.355 
_exptl_crystal_density_method     'not measured' 
_exptl_crystal_F_000              1664 
_exptl_absorpt_coefficient_mu     1.697 
_exptl_absorpt_correction_type    none
_exptl_absorpt_correction_T_min   ?
_exptl_absorpt_correction_T_max   ?
_exptl_absorpt_process_details    ? 
 
_exptl_special_details 
? 
 
_diffrn_ambient_temperature       183(2) 
_diffrn_radiation_wavelength      0.71073 
_diffrn_radiation_type            MoK\a 
_diffrn_radiation_source          'fine-focus sealed tube' 
_diffrn_radiation_monochromator   graphite 
_diffrn_measurement_device_type   KappaCCD 
_diffrn_measurement_method        'phi- + omega-scan'
_diffrn_detector_area_resol_mean  ? 
_diffrn_reflns_number             28263 
_diffrn_reflns_av_R_equivalents   0.0622 
_diffrn_reflns_av_sigmaI/netI     0.1256 
_diffrn_reflns_limit_h_min        -20 
_diffrn_reflns_limit_h_max        20 
_diffrn_reflns_limit_k_min        -15 
_diffrn_reflns_limit_k_max        17 
_diffrn_reflns_limit_l_min        -23 
_diffrn_reflns_limit_l_max        25 
_diffrn_reflns_theta_min          1.36 
_diffrn_reflns_theta_max          27.50 
_reflns_number_total              16922 
_reflns_number_gt                 10285 
_reflns_threshold_expression      >2sigma(I) 
 
_computing_data_collection        COLLECT
_computing_cell_refinement        DENZO
_computing_data_reduction         DENZO
_computing_structure_solution     'SHELXS-97 (Sheldrick, 2008)' 
_computing_structure_refinement   'SHELXL-97 (Sheldrick, 2008)' 
_computing_molecular_graphics     SHELXTL/PC
_computing_publication_material   SHELXL-97
 
_refine_special_details 
; 
 Refinement of F^2^ against ALL reflections.  The weighted R-factor wR and 
 goodness of fit S are based on F^2^, conventional R-factors R are based 
 on F, with F set to zero for negative F^2^. The threshold expression of 
 F^2^ > 2sigma(F^2^) is used only for calculating R-factors(gt) etc. and is 
 not relevant to the choice of reflections for refinement.  R-factors based 
 on F^2^ are statistically about twice as large as those based on F, and R- 
 factors based on ALL data will be even larger. 
; 
 
_refine_ls_structure_factor_coef  Fsqd  
_refine_ls_matrix_type            full 
_refine_ls_weighting_scheme       calc  
_refine_ls_weighting_details 
 'calc w=1/[\s^2^(Fo^2^)+(0.0429P)^2^+0.0000P] where P=(Fo^2^+2Fc^2^)/3' 
_atom_sites_solution_primary      direct 
_atom_sites_solution_secondary    difmap 
_atom_sites_solution_hydrogens    geom 
_refine_ls_hydrogen_treatment     constr 
_refine_ls_extinction_method      none 
_refine_ls_extinction_coef        ? 
_refine_ls_abs_structure_details 
 'Flack H D (1983), Acta Cryst. A39, 876-881' 
_refine_ls_abs_structure_Flack    0.028(6) 
_refine_ls_number_reflns          16922 
_refine_ls_number_parameters      815 
_refine_ls_number_restraints      1 
_refine_ls_R_factor_all           0.1264 
_refine_ls_R_factor_gt            0.0586 
_refine_ls_wR_factor_ref          0.1136 
_refine_ls_wR_factor_gt           0.0988 
_refine_ls_goodness_of_fit_ref    0.948 
_refine_ls_restrained_S_all       0.948 
_refine_ls_shift/su_max           0.028 
_refine_ls_shift/su_mean          0.001 
 
loop_ 
 _atom_site_label 
 _atom_site_type_symbol 
 _atom_site_fract_x 
 _atom_site_fract_y 
 _atom_site_fract_z 
 _atom_site_U_iso_or_equiv 
 _atom_site_adp_type 
 _atom_site_occupancy 
 _atom_site_symmetry_multiplicity 
 _atom_site_calc_flag 
 _atom_site_refinement_flags 
 _atom_site_disorder_assembly 
 _atom_site_disorder_group 
Sr1A Sr -0.07966(3) -0.02446(4) -0.25419(3) 0.03565(16) Uani 1 1 d . A . 
S1A S -0.04078(9) 0.17662(13) -0.17593(8) 0.0385(4) Uani 1 1 d . . . 
S2A S -0.18748(10) 0.00375(13) -0.15469(9) 0.0437(5) Uani 1 1 d . . . 
S3A S -0.06230(11) -0.16884(14) -0.36905(9) 0.0426(4) Uani 1 1 d . . . 
S4A S -0.18943(10) -0.21567(14) -0.26440(9) 0.0441(4) Uani 1 1 d . . . 
P1A P -0.12119(9) 0.13268(12) -0.12202(8) 0.0309(4) Uani 1 1 d . . . 
P2A P -0.14467(11) -0.26366(13) -0.34129(8) 0.0366(4) Uani 1 1 d . . . 
O1A O 0.0379(3) 0.0616(5) -0.2979(2) 0.0756(16) Uani 1 1 d . . . 
O2A O 0.0564(3) -0.1002(4) -0.1673(2) 0.0652(17) Uani 1 1 d . . . 
O3A O -0.1993(3) 0.0619(4) -0.3544(2) 0.0710(16) Uani 1 1 d . . . 
C1A C -0.1982(4) 0.2372(5) -0.1214(3) 0.0364(15) Uani 1 1 d . . . 
C2A C -0.2807(4) 0.2150(5) -0.1133(3) 0.0519(19) Uani 1 1 d . . . 
H2AA H -0.2973 0.1462 -0.1095 0.062 Uiso 1 1 calc R . . 
C3A C -0.3381(4) 0.2931(6) -0.1110(4) 0.065(2) Uani 1 1 d . . . 
H3AA H -0.3948 0.2781 -0.1060 0.078 Uiso 1 1 calc R . . 
C4A C -0.3132(4) 0.3943(5) -0.1158(4) 0.064(2) Uani 1 1 d . . . 
H4AA H -0.3528 0.4482 -0.1145 0.077 Uiso 1 1 calc R . . 
C5A C -0.2322(4) 0.4149(5) -0.1223(4) 0.066(2) Uani 1 1 d . . . 
H5AA H -0.2142 0.4838 -0.1235 0.079 Uiso 1 1 calc R . . 
C6A C -0.1747(4) 0.3364(5) -0.1273(4) 0.052(2) Uani 1 1 d . . . 
H6AA H -0.1196 0.3518 -0.1347 0.063 Uiso 1 1 calc R . . 
C7A C -0.0565(3) 0.1232(5) -0.0286(3) 0.0361(16) Uani 1 1 d . . . 
C8A C -0.0647(4) 0.0410(5) 0.0107(4) 0.053(2) Uani 1 1 d . . . 
H8AA H -0.1033 -0.0134 -0.0111 0.064 Uiso 1 1 calc R . . 
C9A C -0.0171(5) 0.0359(6) 0.0824(4) 0.066(2) Uani 1 1 d . . . 
H9AA H -0.0250 -0.0203 0.1098 0.079 Uiso 1 1 calc R . . 
C10A C 0.0410(4) 0.1123(6) 0.1130(3) 0.057(2) Uani 1 1 d . . . 
H10A H 0.0742 0.1090 0.1616 0.069 Uiso 1 1 calc R . . 
C11A C 0.0516(4) 0.1941(6) 0.0734(3) 0.058(2) Uani 1 1 d . . . 
H11A H 0.0933 0.2462 0.0946 0.069 Uiso 1 1 calc R . . 
C12A C 0.0016(4) 0.2012(5) 0.0027(3) 0.0411(16) Uani 1 1 d . . . 
H12A H 0.0073 0.2591 -0.0241 0.049 Uiso 1 1 calc R . . 
C13A C -0.0891(4) -0.3862(5) -0.3147(3) 0.0398(17) Uani 1 1 d . . . 
C14A C 0.0018(4) -0.3984(6) -0.3017(3) 0.051(2) Uani 1 1 d . . . 
H14A H 0.0368 -0.3446 -0.3110 0.061 Uiso 1 1 calc R . . 
C15A C 0.0415(5) -0.4920(7) -0.2744(4) 0.068(2) Uani 1 1 d . . . 
H15A H 0.1037 -0.5013 -0.2657 0.082 Uiso 1 1 calc R . . 
C16A C -0.0074(6) -0.5686(6) -0.2606(4) 0.060(2) Uani 1 1 d . . . 
H16A H 0.0213 -0.6303 -0.2410 0.072 Uiso 1 1 calc R . . 
C17A C -0.0972(5) -0.5593(6) -0.2741(3) 0.055(2) Uani 1 1 d . . . 
H17A H -0.1314 -0.6151 -0.2665 0.067 Uiso 1 1 calc R . . 
C18A C -0.1383(5) -0.4671(5) -0.2993(3) 0.0462(18) Uani 1 1 d . . . 
H18A H -0.2003 -0.4586 -0.3062 0.055 Uiso 1 1 calc R . . 
C19A C -0.2395(4) -0.2910(5) -0.4189(3) 0.0418(17) Uani 1 1 d . . . 
C20A C -0.2236(4) -0.3173(6) -0.4810(4) 0.0512(19) Uani 1 1 d . . . 
H20A H -0.1643 -0.3210 -0.4830 0.061 Uiso 1 1 calc R . . 
C21A C -0.2963(5) -0.3382(7) -0.5403(4) 0.065(2) Uani 1 1 d . . . 
H21A H -0.2854 -0.3560 -0.5828 0.078 Uiso 1 1 calc R . . 
C22A C -0.3813(5) -0.3341(7) -0.5398(4) 0.065(2) Uani 1 1 d . . . 
H22A H -0.4294 -0.3467 -0.5815 0.078 Uiso 1 1 calc R . . 
C23A C -0.3967(5) -0.3121(7) -0.4794(4) 0.070(3) Uani 1 1 d . . . 
H23A H -0.4564 -0.3128 -0.4781 0.084 Uiso 1 1 calc R . . 
C24A C -0.3262(4) -0.2876(6) -0.4173(4) 0.055(2) Uani 1 1 d . . . 
H24A H -0.3385 -0.2692 -0.3755 0.066 Uiso 1 1 calc R . . 
C25A C 0.1170(16) 0.1178(19) -0.2584(14) 0.107(8) Uiso 0.50 1 d P A 1 
H25A H 0.1670 0.0705 -0.2364 0.129 Uiso 0.50 1 calc PR A 1 
H25B H 0.1049 0.1588 -0.2209 0.129 Uiso 0.50 1 calc PR A 1 
C26A C 0.1395(15) 0.1856(16) -0.3105(11) 0.088(6) Uiso 0.50 1 d P A 1 
H26A H 0.1049 0.2498 -0.3172 0.106 Uiso 0.50 1 calc PR A 1 
H26B H 0.2040 0.2020 -0.2950 0.106 Uiso 0.50 1 calc PR A 1 
C27A C 0.1163(11) 0.1297(16) -0.3706(10) 0.080(5) Uiso 0.50 1 d P A 1 
H27A H 0.1508 0.0657 -0.3665 0.097 Uiso 0.50 1 calc PR A 1 
H27B H 0.1176 0.1690 -0.4125 0.097 Uiso 0.50 1 calc PR A 1 
C28A C 0.0101(13) 0.1118(19) -0.3658(12) 0.097(7) Uiso 0.50 1 d P A 1 
H28A H -0.0214 0.1768 -0.3651 0.116 Uiso 0.50 1 calc PR A 1 
H28B H -0.0269 0.0672 -0.4038 0.116 Uiso 0.50 1 calc PR A 1 
C25D C 0.1307(10) 0.0790(14) -0.2524(8) 0.056(4) Uiso 0.50 1 d P A 2 
H25G H 0.1331 0.0894 -0.2029 0.067 Uiso 0.50 1 calc PR A 2 
H25H H 0.1693 0.0205 -0.2547 0.067 Uiso 0.50 1 calc PR A 2 
C26D C 0.1590(12) 0.1716(14) -0.2810(10) 0.072(5) Uiso 0.50 1 d P A 2 
H26G H 0.2188 0.1626 -0.2862 0.087 Uiso 0.50 1 calc PR A 2 
H26H H 0.1602 0.2311 -0.2503 0.087 Uiso 0.50 1 calc PR A 2 
C27D C 0.0806(16) 0.1852(18) -0.3593(13) 0.119(8) Uiso 0.50 1 d P A 2 
H27G H 0.0373 0.2394 -0.3585 0.143 Uiso 0.50 1 calc PR A 2 
H27H H 0.1071 0.1999 -0.3970 0.143 Uiso 0.50 1 calc PR A 2 
C28D C 0.0360(12) 0.0755(14) -0.3683(9) 0.071(5) Uiso 0.50 1 d P A 2 
H28G H -0.0257 0.0758 -0.4015 0.085 Uiso 0.50 1 calc PR A 2 
H28H H 0.0722 0.0238 -0.3831 0.085 Uiso 0.50 1 calc PR A 2 
C32A C 0.0878(4) -0.0820(6) -0.0952(3) 0.0562(19) Uani 1 1 d . A . 
H32A H 0.0401 -0.0930 -0.0736 0.067 Uiso 0.50 1 calc PR B 1 
H32B H 0.1106 -0.0115 -0.0852 0.067 Uiso 0.50 1 calc PR B 1 
H32E H 0.0524 -0.1208 -0.0708 0.067 Uiso 0.50 1 calc PR B 2 
H32F H 0.0839 -0.0085 -0.0853 0.067 Uiso 0.50 1 calc PR B 2 
C29A C 0.0994(7) -0.2010(9) -0.1777(6) 0.033(3) Uiso 0.50 1 d P A 1 
H29A H 0.0544 -0.2560 -0.1925 0.040 Uiso 0.50 1 calc PR A 1 
H29B H 0.1311 -0.1941 -0.2130 0.040 Uiso 0.50 1 calc PR A 1 
C30A C 0.1635(9) -0.2207(11) -0.1055(7) 0.047(3) Uiso 0.50 1 d P A 1 
H30A H 0.1477 -0.2860 -0.0877 0.057 Uiso 0.50 1 calc PR A 1 
H30B H 0.2246 -0.2275 -0.1087 0.057 Uiso 0.50 1 calc PR A 1 
C31A C 0.1628(9) -0.1593(12) -0.0680(8) 0.059(4) Uiso 0.50 1 d P A 1 
H31A H 0.2207 -0.1228 -0.0555 0.071 Uiso 0.50 1 calc PR A 1 
H31B H 0.1576 -0.1905 -0.0245 0.071 Uiso 0.50 1 calc PR A 1 
C29D C 0.1244(13) -0.1586(16) -0.1872(11) 0.093(6) Uiso 0.50 1 d P A 2 
H29E H 0.0942 -0.2108 -0.2225 0.112 Uiso 0.50 1 calc PR A 2 
H29F H 0.1568 -0.1120 -0.2095 0.112 Uiso 0.50 1 calc PR A 2 
C30D C 0.1815(13) -0.2034(17) -0.1339(10) 0.089(7) Uiso 0.50 1 d P A 2 
H30E H 0.2407 -0.2115 -0.1407 0.107 Uiso 0.50 1 calc PR A 2 
H30F H 0.1597 -0.2706 -0.1238 0.107 Uiso 0.50 1 calc PR A 2 
C31D C 0.1841(9) -0.1171(11) -0.0711(7) 0.052(4) Uiso 0.50 1 d P A 2 
H31E H 0.2007 -0.1486 -0.0238 0.062 Uiso 0.50 1 calc PR A 2 
H31F H 0.2256 -0.0604 -0.0708 0.062 Uiso 0.50 1 calc PR A 2 
C33A C -0.2406(12) 0.1673(14) -0.3525(9) 0.073(5) Uiso 0.50 1 d P A 1 
H33A H -0.2791 0.1678 -0.3219 0.087 Uiso 0.50 1 calc PR A 1 
H33D H -0.1942 0.2207 -0.3367 0.087 Uiso 0.50 1 calc PR A 1 
C34A C -0.2885(18) 0.178(2) -0.4208(13) 0.141(9) Uiso 0.50 1 d P A 1 
H34A H -0.2487 0.1977 -0.4482 0.169 Uiso 0.50 1 calc PR A 1 
H34B H -0.3335 0.2328 -0.4261 0.169 Uiso 0.50 1 calc PR A 1 
C35A C -0.3315(12) 0.0855(18) -0.4463(11) 0.093(6) Uiso 0.50 1 d P A 1 
H35A H -0.3235 0.0675 -0.4919 0.112 Uiso 0.50 1 calc PR A 1 
H35B H -0.3962 0.0900 -0.4526 0.112 Uiso 0.50 1 calc PR A 1 
C36A C -0.2833(11) 0.0009(13) -0.3859(9) 0.064(5) Uiso 0.50 1 d P A 1 
H36A H -0.3166 -0.0110 -0.3522 0.076 Uiso 0.50 1 calc PR A 1 
H36B H -0.2721 -0.0646 -0.4062 0.076 Uiso 0.50 1 calc PR A 1 
C33D C -0.2032(9) 0.1680(11) -0.3709(9) 0.063(4) Uiso 0.50 1 d P A 2 
H33E H -0.1820 0.1846 -0.4112 0.076 Uiso 0.50 1 calc PR A 2 
H33F H -0.1739 0.2120 -0.3299 0.076 Uiso 0.50 1 calc PR A 2 
C34D C -0.3295(13) 0.1636(16) -0.3944(12) 0.092(6) Uiso 0.50 1 d P A 2 
H34E H -0.3475 0.1754 -0.3519 0.110 Uiso 0.50 1 calc PR A 2 
H34F H -0.3571 0.2171 -0.4294 0.110 Uiso 0.50 1 calc PR A 2 
C35D C -0.3561(12) 0.0722(18) -0.4210(11) 0.092(6) Uiso 0.50 1 d P A 2 
H35E H -0.3911 0.0771 -0.4715 0.110 Uiso 0.50 1 calc PR A 2 
H35F H -0.3933 0.0390 -0.3956 0.110 Uiso 0.50 1 calc PR A 2 
C36D C -0.2647(9) 0.0095(12) -0.4102(9) 0.058(4) Uiso 0.50 1 d P A 2 
H36E H -0.2712 -0.0621 -0.3969 0.069 Uiso 0.50 1 calc PR A 2 
H36F H -0.2479 0.0101 -0.4538 0.069 Uiso 0.50 1 calc PR A 2 
Sr1B Sr 0.59381(3) 0.07832(4) 0.26180(3) 0.03637(16) Uani 1 1 d . C . 
S1B S 0.56582(11) 0.22764(15) 0.36950(10) 0.0484(5) Uani 1 1 d . . . 
S2B S 0.68181(10) 0.28106(13) 0.25780(8) 0.0412(4) Uani 1 1 d . . . 
S3B S 0.56716(10) -0.12466(13) 0.18577(9) 0.0437(4) Uani 1 1 d . . . 
S4B S 0.69848(10) 0.06309(15) 0.15888(9) 0.0481(5) Uani 1 1 d . . . 
P1B P 0.63895(10) 0.32763(13) 0.33631(8) 0.0372(4) Uani 1 1 d . . . 
P2B P 0.63088(10) -0.06474(13) 0.12307(9) 0.0360(4) Uani 1 1 d . . . 
O1B O 0.5104(3) -0.0284(4) 0.3283(2) 0.0707(14) Uani 1 1 d . . . 
O2B O 0.4440(3) 0.1413(4) 0.1802(2) 0.0484(12) Uani 1 1 d . . . 
O3B O 0.7276(3) 0.0132(3) 0.3610(2) 0.0546(13) Uani 1 1 d . . . 
C1B C 0.7336(4) 0.3635(5) 0.4124(3) 0.0351(16) Uani 1 1 d . . . 
C2B C 0.8209(4) 0.3568(5) 0.4117(4) 0.0473(19) Uani 1 1 d . . . 
H2BA H 0.8319 0.3374 0.3695 0.057 Uiso 1 1 calc R . . 
C3B C 0.8922(4) 0.3778(6) 0.4707(4) 0.059(2) Uani 1 1 d . . . 
H3BA H 0.9518 0.3700 0.4699 0.071 Uiso 1 1 calc R . . 
C4B C 0.8758(5) 0.4102(6) 0.5311(4) 0.059(2) Uani 1 1 d . . . 
H4BA H 0.9244 0.4264 0.5718 0.071 Uiso 1 1 calc R . . 
C5B C 0.7890(5) 0.4194(7) 0.5328(4) 0.070(2) Uani 1 1 d . . . 
H5BA H 0.7780 0.4415 0.5744 0.083 Uiso 1 1 calc R . . 
C6B C 0.7184(4) 0.3960(6) 0.4730(4) 0.059(2) Uani 1 1 d . . . 
H6BA H 0.6588 0.4025 0.4739 0.071 Uiso 1 1 calc R . . 
C7B C 0.5773(4) 0.4478(5) 0.3088(3) 0.047(2) Uani 1 1 d . . . 
C8B C 0.4871(5) 0.4532(6) 0.2986(4) 0.075(3) Uani 1 1 d . . . 
H8BA H 0.4566 0.3967 0.3100 0.090 Uiso 1 1 calc R . . 
C9B C 0.4402(5) 0.5431(7) 0.2710(5) 0.080(3) Uani 1 1 d . . . 
H9BA H 0.3776 0.5474 0.2627 0.096 Uiso 1 1 calc R . . 
C10B C 0.4865(7) 0.6245(8) 0.2563(5) 0.095(4) Uani 1 1 d . . . 
H10B H 0.4557 0.6855 0.2376 0.114 Uiso 1 1 calc R . . 
C11B C 0.5760(6) 0.6178(7) 0.2684(4) 0.073(3) Uani 1 1 d . . . 
H11B H 0.6071 0.6747 0.2582 0.088 Uiso 1 1 calc R . . 
C12B C 0.6227(5) 0.5302(6) 0.2952(3) 0.057(2) Uani 1 1 d . . . 
H12B H 0.6854 0.5270 0.3041 0.068 Uiso 1 1 calc R . . 
C13B C 0.5513(3) -0.0435(5) 0.0353(3) 0.0355(15) Uani 1 1 d . . . 
C14B C 0.4853(4) -0.1137(6) 0.0073(3) 0.0478(18) Uani 1 1 d . . . 
H14B H 0.4774 -0.1692 0.0352 0.057 Uiso 1 1 calc R . . 
C15B C 0.4295(4) -0.1039(7) -0.0627(4) 0.067(2) Uani 1 1 d . . . 
H15B H 0.3848 -0.1535 -0.0827 0.081 Uiso 1 1 calc R . . 
C16B C 0.4401(5) -0.0223(7) -0.1015(4) 0.066(2) Uani 1 1 d . . . 
H16B H 0.4012 -0.0144 -0.1483 0.080 Uiso 1 1 calc R . . 
C17B C 0.5052(6) 0.0480(7) -0.0745(4) 0.073(3) Uani 1 1 d . . . 
H17B H 0.5120 0.1036 -0.1028 0.087 Uiso 1 1 calc R . . 
C18B C 0.5618(5) 0.0388(6) -0.0059(4) 0.058(2) Uani 1 1 d . . . 
H18B H 0.6074 0.0879 0.0129 0.069 Uiso 1 1 calc R . . 
C19B C 0.7021(3) -0.1597(5) 0.1039(3) 0.0376(16) Uani 1 1 d . . . 
C20B C 0.6814(4) -0.2639(5) 0.1027(4) 0.0540(19) Uani 1 1 d . . . 
H20B H 0.6342 -0.2870 0.1188 0.065 Uiso 1 1 calc R . . 
C21B C 0.7313(4) -0.3325(5) 0.0776(4) 0.061(2) Uani 1 1 d . . . 
H21B H 0.7153 -0.4025 0.0747 0.073 Uiso 1 1 calc R . . 
C22B C 0.8022(4) -0.3033(5) 0.0569(5) 0.075(2) Uani 1 1 d . . . 
H22B H 0.8355 -0.3517 0.0401 0.090 Uiso 1 1 calc R . . 
C23B C 0.8234(4) -0.2027(6) 0.0610(5) 0.086(3) Uani 1 1 d . . . 
H23B H 0.8741 -0.1816 0.0486 0.103 Uiso 1 1 calc R . . 
C24B C 0.7744(4) -0.1298(6) 0.0824(4) 0.069(2) Uani 1 1 d . . . 
H24B H 0.7898 -0.0598 0.0826 0.083 Uiso 1 1 calc R . . 
C25B C 0.5403(9) -0.0463(13) 0.4048(7) 0.097(5) Uiso 0.676(14) 1 d P C 1 
H25C H 0.5840 -0.1028 0.4174 0.116 Uiso 0.676(14) 1 calc PR C 1 
H25D H 0.5683 0.0158 0.4305 0.116 Uiso 0.676(14) 1 calc PR C 1 
C26B C 0.4588(8) -0.0726(11) 0.4214(7) 0.084(4) Uiso 0.676(14) 1 d P C 1 
H26C H 0.4456 -0.0204 0.4524 0.100 Uiso 0.676(14) 1 calc PR C 1 
H26D H 0.4655 -0.1396 0.4453 0.100 Uiso 0.676(14) 1 calc PR C 1 
C27B C 0.3808(10) -0.0767(14) 0.3470(9) 0.102(5) Uiso 0.676(14) 1 d P C 1 
H27C H 0.3429 -0.1380 0.3431 0.123 Uiso 0.676(14) 1 calc PR C 1 
H27D H 0.3429 -0.0150 0.3391 0.123 Uiso 0.676(14) 1 calc PR C 1 
C28B C 0.4341(8) -0.0814(11) 0.2977(7) 0.086(5) Uiso 0.676(14) 1 d P C 1 
H28C H 0.4480 -0.1530 0.2897 0.104 Uiso 0.676(14) 1 calc PR C 1 
H28D H 0.4004 -0.0505 0.2519 0.104 Uiso 0.676(14) 1 calc PR C 1 
C25C C 0.5339(18) -0.106(3) 0.3694(16) 0.091(9) Uiso 0.324(14) 1 d P C 2 
H25E H 0.5833 -0.0869 0.4120 0.109 Uiso 0.324(14) 1 calc PR C 2 
H25F H 0.5553 -0.1614 0.3451 0.109 Uiso 0.324(14) 1 calc PR C 2 
C26C C 0.453(2) -0.144(3) 0.390(2) 0.123(13) Uiso 0.324(14) 1 d P C 2 
H26E H 0.4188 -0.1959 0.3571 0.148 Uiso 0.324(14) 1 calc PR C 2 
H26F H 0.4725 -0.1723 0.4386 0.148 Uiso 0.324(14) 1 calc PR C 2 
C27C C 0.4019(18) -0.050(2) 0.3864(15) 0.071(8) Uiso 0.324(14) 1 d P C 2 
H27E H 0.3389 -0.0654 0.3822 0.085 Uiso 0.324(14) 1 calc PR C 2 
H27F H 0.4282 -0.0064 0.4279 0.085 Uiso 0.324(14) 1 calc PR C 2 
C28C C 0.4092(17) -0.004(2) 0.3224(15) 0.091(9) Uiso 0.324(14) 1 d P C 2 
H28E H 0.3983 0.0704 0.3216 0.110 Uiso 0.324(14) 1 calc PR C 2 
H28F H 0.3670 -0.0353 0.2798 0.110 Uiso 0.324(14) 1 calc PR C 2 
C29B C 0.3680(4) 0.1798(5) 0.1985(4) 0.0537(18) Uani 1 1 d . C . 
H29C H 0.3877 0.2139 0.2449 0.064 Uiso 1 1 calc R . . 
H29D H 0.3264 0.1239 0.1998 0.064 Uiso 1 1 calc R . . 
C30B C 0.3238(5) 0.2553(8) 0.1405(5) 0.095(3) Uani 1 1 d . . . 
H30C H 0.2727 0.2233 0.1044 0.114 Uiso 1 1 calc R C . 
H30D H 0.3020 0.3156 0.1599 0.114 Uiso 1 1 calc R . . 
C31B C 0.3941(5) 0.2845(6) 0.1101(5) 0.084(3) Uani 1 1 d . C . 
H31C H 0.4334 0.3383 0.1382 0.100 Uiso 1 1 calc R . . 
H31D H 0.3684 0.3080 0.0608 0.100 Uiso 1 1 calc R . . 
C32B C 0.4441(4) 0.1833(6) 0.1144(4) 0.066(2) Uani 1 1 d . C . 
H32C H 0.4127 0.1378 0.0749 0.080 Uiso 1 1 calc R . . 
H32D H 0.5058 0.1947 0.1137 0.080 Uiso 1 1 calc R . . 
C33B C 0.7960(5) 0.0805(7) 0.4003(4) 0.086(3) Uani 1 1 d . C . 
H33B H 0.7715 0.1289 0.4274 0.104 Uiso 1 1 calc R . . 
H33C H 0.8197 0.1202 0.3680 0.104 Uiso 1 1 calc R . . 
C34B C 0.8684(5) 0.0197(6) 0.4488(5) 0.089(3) Uani 1 1 d . . . 
H34C H 0.9278 0.0445 0.4491 0.107 Uiso 1 1 calc R C . 
H34D H 0.8652 0.0224 0.4974 0.107 Uiso 1 1 calc R . . 
C35B C 0.8521(6) -0.0824(7) 0.4207(4) 0.092(3) Uani 1 1 d . C . 
H35C H 0.8577 -0.1316 0.4593 0.110 Uiso 1 1 calc R . . 
H35D H 0.8968 -0.1003 0.3973 0.110 Uiso 1 1 calc R . . 
C36B C 0.7619(5) -0.0880(6) 0.3695(4) 0.0790(19) Uani 1 1 d . C . 
H36C H 0.7641 -0.1154 0.3242 0.124 Uiso 1 1 calc R . . 
H36D H 0.7234 -0.1330 0.3875 0.124 Uiso 1 1 calc R . . 
 
loop_ 
 _atom_site_aniso_label 
 _atom_site_aniso_U_11 
 _atom_site_aniso_U_22 
 _atom_site_aniso_U_33 
 _atom_site_aniso_U_23 
 _atom_site_aniso_U_13 
 _atom_site_aniso_U_12 
Sr1A 0.0365(3) 0.0383(3) 0.0307(3) -0.0020(3) 0.0085(2) 0.0027(2) 
S1A 0.0414(8) 0.0402(9) 0.0379(9) -0.0030(7) 0.0179(7) -0.0052(6) 
S2A 0.0391(8) 0.0433(11) 0.0520(10) -0.0128(8) 0.0189(8) -0.0109(7) 
S3A 0.0548(9) 0.0423(11) 0.0373(9) -0.0023(8) 0.0238(8) -0.0086(8) 
S4A 0.0559(9) 0.0441(11) 0.0382(9) -0.0049(8) 0.0234(8) -0.0046(8) 
P1A 0.0277(7) 0.0329(9) 0.0312(9) -0.0025(7) 0.0078(6) -0.0010(6) 
P2A 0.0484(9) 0.0350(10) 0.0288(9) -0.0004(7) 0.0157(7) -0.0019(7) 
O1A 0.091(3) 0.091(4) 0.060(3) -0.027(3) 0.045(3) -0.042(3) 
O2A 0.059(3) 0.075(4) 0.047(3) -0.018(3) -0.004(2) 0.037(2) 
O3A 0.090(3) 0.043(3) 0.056(3) 0.004(2) -0.011(3) 0.015(3) 
C1A 0.034(3) 0.038(4) 0.032(3) -0.001(3) 0.003(2) 0.007(2) 
C2A 0.038(3) 0.057(4) 0.053(4) -0.016(3) 0.003(3) 0.009(3) 
C3A 0.034(3) 0.079(6) 0.074(5) -0.026(4) 0.006(3) 0.009(3) 
C4A 0.050(4) 0.055(5) 0.079(5) -0.012(4) 0.010(4) 0.026(3) 
C5A 0.060(4) 0.049(4) 0.084(5) 0.001(4) 0.015(4) 0.018(3) 
C6A 0.045(3) 0.042(4) 0.065(5) -0.008(3) 0.010(3) 0.011(3) 
C7A 0.028(3) 0.045(4) 0.035(3) 0.006(3) 0.010(3) 0.007(2) 
C8A 0.070(4) 0.035(4) 0.050(4) 0.008(3) 0.013(4) -0.004(3) 
C9A 0.094(6) 0.056(5) 0.039(4) 0.018(4) 0.009(4) 0.015(4) 
C10A 0.058(4) 0.078(6) 0.026(3) 0.004(3) -0.002(3) 0.022(4) 
C11A 0.043(4) 0.082(5) 0.041(4) 0.001(4) 0.002(3) -0.006(3) 
C12A 0.035(3) 0.055(4) 0.032(3) -0.003(3) 0.007(2) -0.008(3) 
C13A 0.053(4) 0.039(4) 0.024(3) -0.006(3) 0.007(3) 0.000(3) 
C14A 0.059(4) 0.049(5) 0.047(4) 0.000(3) 0.021(3) 0.001(3) 
C15A 0.073(5) 0.070(6) 0.061(5) -0.007(4) 0.020(4) 0.011(4) 
C16A 0.094(6) 0.042(4) 0.044(4) 0.000(4) 0.022(4) 0.015(4) 
C17A 0.089(5) 0.048(5) 0.029(4) -0.004(3) 0.018(4) -0.016(4) 
C18A 0.068(4) 0.041(4) 0.028(4) -0.001(3) 0.014(3) -0.010(3) 
C19A 0.054(4) 0.034(4) 0.036(4) -0.004(3) 0.014(3) -0.003(3) 
C20A 0.053(4) 0.065(5) 0.038(4) -0.010(3) 0.018(3) -0.008(3) 
C21A 0.074(5) 0.082(6) 0.035(4) -0.016(4) 0.012(4) 0.001(4) 
C22A 0.066(5) 0.088(6) 0.033(4) -0.009(4) 0.003(4) -0.002(4) 
C23A 0.051(4) 0.087(7) 0.060(5) 0.006(5) 0.000(4) -0.017(4) 
C24A 0.061(4) 0.072(6) 0.038(4) 0.002(4) 0.022(4) -0.006(4) 
C32A 0.056(4) 0.067(5) 0.042(4) -0.001(3) 0.010(3) 0.009(3) 
Sr1B 0.0355(3) 0.0401(4) 0.0325(3) -0.0006(3) 0.0094(2) -0.0043(3) 
S1B 0.0474(9) 0.0559(13) 0.0452(10) -0.0095(9) 0.0196(8) -0.0093(8) 
S2B 0.0530(9) 0.0403(10) 0.0333(9) -0.0063(8) 0.0179(8) -0.0057(8) 
S3B 0.0483(9) 0.0456(10) 0.0396(9) -0.0035(8) 0.0174(7) -0.0152(7) 
S4B 0.0506(9) 0.0433(11) 0.0578(11) -0.0088(9) 0.0278(8) -0.0156(8) 
P1B 0.0372(8) 0.0412(10) 0.0310(9) -0.0061(8) 0.0075(7) 0.0000(7) 
P2B 0.0323(8) 0.0394(10) 0.0386(9) -0.0016(8) 0.0146(7) -0.0047(6) 
O1B 0.096(3) 0.078(4) 0.049(3) -0.007(3) 0.038(3) -0.038(3) 
O2B 0.041(2) 0.062(3) 0.042(2) 0.001(2) 0.013(2) 0.011(2) 
O3B 0.050(2) 0.041(3) 0.062(3) 0.002(2) 0.002(2) 0.004(2) 
C1B 0.038(3) 0.027(3) 0.037(4) -0.002(3) 0.006(3) 0.001(2) 
C2B 0.045(4) 0.053(5) 0.042(4) -0.009(3) 0.011(3) -0.004(3) 
C3B 0.035(3) 0.085(6) 0.054(5) -0.012(4) 0.009(3) -0.001(4) 
C4B 0.057(4) 0.065(5) 0.046(4) -0.001(4) 0.002(4) -0.009(4) 
C5B 0.070(5) 0.090(6) 0.047(5) -0.026(4) 0.014(4) -0.007(4) 
C6B 0.044(4) 0.081(6) 0.052(4) -0.025(4) 0.015(3) -0.001(3) 
C7B 0.051(4) 0.051(5) 0.032(4) -0.009(3) 0.006(3) 0.011(3) 
C8B 0.060(5) 0.061(6) 0.086(6) -0.020(5) -0.002(4) 0.019(4) 
C9B 0.053(4) 0.076(7) 0.084(6) -0.019(5) -0.018(4) 0.033(4) 
C10B 0.112(8) 0.074(7) 0.066(6) -0.023(6) -0.016(6) 0.039(6) 
C11B 0.119(7) 0.048(5) 0.039(4) 0.001(4) 0.004(5) 0.021(4) 
C12B 0.071(5) 0.053(5) 0.035(4) -0.005(4) 0.001(4) 0.017(4) 
C13B 0.036(3) 0.043(4) 0.034(3) 0.003(3) 0.021(3) 0.008(3) 
C14B 0.037(3) 0.069(5) 0.039(4) 0.001(3) 0.015(3) -0.006(3) 
C15B 0.039(4) 0.107(7) 0.048(4) 0.003(5) 0.003(3) -0.001(4) 
C16B 0.067(5) 0.093(6) 0.039(4) 0.001(5) 0.016(3) 0.027(5) 
C17B 0.100(6) 0.060(5) 0.055(5) 0.017(4) 0.019(4) 0.022(5) 
C18B 0.066(4) 0.051(5) 0.054(5) 0.004(4) 0.017(4) 0.005(3) 
C19B 0.035(3) 0.029(3) 0.048(4) 0.004(3) 0.011(3) 0.000(2) 
C20B 0.048(4) 0.047(4) 0.067(5) -0.001(4) 0.020(3) -0.008(3) 
C21B 0.064(4) 0.039(4) 0.079(5) 0.000(4) 0.022(4) 0.011(3) 
C22B 0.048(4) 0.049(5) 0.137(8) 0.017(5) 0.041(4) 0.016(3) 
C23B 0.052(4) 0.057(5) 0.163(9) 0.004(5) 0.056(5) 0.007(3) 
C24B 0.051(4) 0.047(4) 0.120(7) -0.004(5) 0.043(4) -0.002(3) 
C29B 0.040(3) 0.066(5) 0.061(4) 0.002(4) 0.025(3) 0.003(3) 
C30B 0.080(5) 0.139(9) 0.083(6) 0.045(6) 0.049(5) 0.071(6) 
C31B 0.069(5) 0.079(6) 0.116(7) 0.031(5) 0.048(5) 0.006(4) 
C32B 0.053(4) 0.098(6) 0.051(4) 0.012(4) 0.021(3) 0.021(4) 
C33B 0.073(5) 0.070(6) 0.086(6) -0.013(5) -0.017(4) 0.025(5) 
C34B 0.070(5) 0.080(6) 0.089(6) -0.001(5) -0.014(5) 0.022(4) 
C35B 0.105(7) 0.069(6) 0.073(6) 0.002(5) -0.012(5) 0.027(5) 
C36B 0.061(3) 0.074(4) 0.088(5) 0.002(3) 0.004(3) 0.013(3) 
 
_geom_special_details 
; 
 All esds (except the esd in the dihedral angle between two l.s. planes) 
 are estimated using the full covariance matrix.  The cell esds are taken 
 into account individually in the estimation of esds in distances, angles 
 and torsion angles; correlations between esds in cell parameters are only 
 used when they are defined by crystal symmetry.  An approximate (isotropic) 
 treatment of cell esds is used for estimating esds involving l.s. planes. 
; 
 
loop_ 
 _geom_bond_atom_site_label_1 
 _geom_bond_atom_site_label_2 
 _geom_bond_distance 
 _geom_bond_site_symmetry_2 
 _geom_bond_publ_flag 
Sr1A O2A 2.503(4) . ? 
Sr1A O3A 2.546(4) . ? 
Sr1A O1A 2.551(5) . ? 
Sr1A S4A 3.0185(18) . ? 
Sr1A S2A 3.023(2) . ? 
Sr1A S1A 3.0308(17) . ? 
Sr1A S3A 3.058(2) . ? 
S1A P1A 1.993(2) . ? 
S2A P1A 1.988(2) . ? 
S3A P2A 2.000(3) . ? 
S4A P2A 1.988(3) . ? 
P1A C7A 1.831(6) . ? 
P1A C1A 1.834(6) . ? 
P2A C19A 1.820(6) . ? 
P2A C13A 1.829(6) . ? 
O1A C28D 1.412(18) . ? 
O1A C25A 1.45(2) . ? 
O1A C28A 1.45(2) . ? 
O1A C25D 1.477(14) . ? 
O2A C32A 1.391(7) . ? 
O2A C29D 1.47(2) . ? 
O2A C29A 1.531(12) . ? 
O3A C33D 1.428(15) . ? 
O3A C36D 1.434(15) . ? 
O3A C36A 1.505(16) . ? 
O3A C33A 1.534(18) . ? 
C1A C6A 1.368(9) . ? 
C1A C2A 1.392(9) . ? 
C2A C3A 1.379(9) . ? 
C2A H2AA 0.9500 . ? 
C3A C4A 1.397(10) . ? 
C3A H3AA 0.9500 . ? 
C4A C5A 1.351(10) . ? 
C4A H4AA 0.9500 . ? 
C5A C6A 1.397(9) . ? 
C5A H5AA 0.9500 . ? 
C6A H6AA 0.9500 . ? 
C7A C8A 1.365(9) . ? 
C7A C12A 1.385(8) . ? 
C8A C9A 1.397(8) . ? 
C8A H8AA 0.9500 . ? 
C9A C10A 1.366(10) . ? 
C9A H9AA 0.9500 . ? 
C10A C11A 1.375(10) . ? 
C10A H10A 0.9500 . ? 
C11A C12A 1.390(8) . ? 
C11A H11A 0.9500 . ? 
C12A H12A 0.9500 . ? 
C13A C14A 1.383(9) . ? 
C13A C18A 1.405(9) . ? 
C14A C15A 1.408(10) . ? 
C14A H14A 0.9500 . ? 
C15A C16A 1.349(11) . ? 
C15A H15A 0.9500 . ? 
C16A C17A 1.361(10) . ? 
C16A H16A 0.9500 . ? 
C17A C18A 1.390(10) . ? 
C17A H17A 0.9500 . ? 
C18A H18A 0.9500 . ? 
C19A C24A 1.378(10) . ? 
C19A C20A 1.388(9) . ? 
C20A C21A 1.393(9) . ? 
C20A H20A 0.9500 . ? 
C21A C22A 1.344(11) . ? 
C21A H21A 0.9500 . ? 
C22A C23A 1.338(11) . ? 
C22A H22A 0.9500 . ? 
C23A C24A 1.418(9) . ? 
C23A H23A 0.9500 . ? 
C24A H24A 0.9500 . ? 
C25A C26A 1.50(3) . ? 
C25A H25A 0.9900 . ? 
C25A H25B 0.9900 . ? 
C26A C27A 1.36(3) . ? 
C26A H26A 0.9900 . ? 
C26A H26B 0.9900 . ? 
C27A C28A 1.73(3) . ? 
C27A H27A 0.9900 . ? 
C27A H27B 0.9900 . ? 
C28A H28A 0.9900 . ? 
C28A H28B 0.9900 . ? 
C25D C26D 1.47(3) . ? 
C25D H25G 0.9900 . ? 
C25D H25H 0.9900 . ? 
C26D C27D 1.67(3) . ? 
C26D H26G 0.9900 . ? 
C26D H26H 0.9900 . ? 
C27D C28D 1.59(3) . ? 
C27D H27G 0.9900 . ? 
C27D H27H 0.9900 . ? 
C28D H28G 0.9900 . ? 
C28D H28H 0.9900 . ? 
C32A C31D 1.513(14) . ? 
C32A C31A 1.523(15) . ? 
C32A H32A 0.9900 . ? 
C32A H32B 0.9900 . ? 
C32A H32E 0.9900 . ? 
C32A H32F 0.9900 . ? 
C29A C30A 1.501(16) . ? 
C29A H29A 0.9900 . ? 
C29A H29B 0.9900 . ? 
C30A C31A 1.104(18) . ? 
C30A H30A 0.9900 . ? 
C30A H30B 0.9900 . ? 
C31A H31A 0.9900 . ? 
C31A H31B 0.9900 . ? 
C29D C30D 1.30(2) . ? 
C29D H29E 0.9900 . ? 
C29D H29F 0.9900 . ? 
C30D C31D 1.68(2) . ? 
C30D H30E 0.9900 . ? 
C30D H30F 0.9900 . ? 
C31D H31E 0.9900 . ? 
C31D H31F 0.9900 . ? 
C33A C34A 1.35(3) . ? 
C33A H33A 0.9900 . ? 
C33A H33D 0.9900 . ? 
C34A C35A 1.41(3) . ? 
C34A H34A 0.9900 . ? 
C34A H34B 0.9900 . ? 
C35A C36A 1.64(3) . ? 
C35A H35A 0.9900 . ? 
C35A H35B 0.9900 . ? 
C36A H36A 0.9900 . ? 
C36A H36B 0.9900 . ? 
C33D C34D 1.90(2) . ? 
C33D H33E 0.9900 . ? 
C33D H33F 0.9900 . ? 
C34D C35D 1.33(3) . ? 
C34D H34E 0.9900 . ? 
C34D H34F 0.9900 . ? 
C35D C36D 1.61(2) . ? 
C35D H35E 0.9900 . ? 
C35D H35F 0.9900 . ? 
C36D H36E 0.9900 . ? 
C36D H36F 0.9900 . ? 
Sr1B O3B 2.545(4) . ? 
Sr1B O2B 2.549(4) . ? 
Sr1B O1B 2.564(5) . ? 
Sr1B S2B 3.0134(18) . ? 
Sr1B S4B 3.027(2) . ? 
Sr1B S3B 3.0303(19) . ? 
Sr1B S1B 3.047(2) . ? 
S1B P1B 1.995(3) . ? 
S2B P1B 1.993(3) . ? 
S3B P2B 2.001(2) . ? 
S4B P2B 1.995(2) . ? 
P1B C1B 1.826(5) . ? 
P1B C7B 1.843(7) . ? 
P2B C19B 1.799(6) . ? 
P2B C13B 1.830(5) . ? 
O1B C25C 1.29(3) . ? 
O1B C28B 1.357(12) . ? 
O1B C25B 1.472(14) . ? 
O1B C28C 1.60(3) . ? 
O2B C32B 1.429(8) . ? 
O2B C29B 1.451(7) . ? 
O3B C36B 1.424(8) . ? 
O3B C33B 1.425(8) . ? 
C1B C6B 1.377(9) . ? 
C1B C2B 1.385(9) . ? 
C2B C3B 1.378(8) . ? 
C2B H2BA 0.9500 . ? 
C3B C4B 1.381(10) . ? 
C3B H3BA 0.9500 . ? 
C4B C5B 1.386(11) . ? 
C4B H4BA 0.9500 . ? 
C5B C6B 1.388(9) . ? 
C5B H5BA 0.9500 . ? 
C6B H6BA 0.9500 . ? 
C7B C8B 1.375(10) . ? 
C7B C12B 1.369(10) . ? 
C8B C9B 1.409(11) . ? 
C8B H8BA 0.9500 . ? 
C9B C10B 1.378(13) . ? 
C9B H9BA 0.9500 . ? 
C10B C11B 1.358(12) . ? 
C10B H10B 0.9500 . ? 
C11B C12B 1.380(10) . ? 
C11B H11B 0.9500 . ? 
C12B H12B 0.9500 . ? 
C13B C14B 1.370(9) . ? 
C13B C18B 1.401(9) . ? 
C14B C15B 1.406(8) . ? 
C14B H14B 0.9500 . ? 
C15B C16B 1.364(11) . ? 
C15B H15B 0.9500 . ? 
C16B C17B 1.359(11) . ? 
C16B H16B 0.9500 . ? 
C17B C18B 1.388(9) . ? 
C17B H17B 0.9500 . ? 
C18B H18B 0.9500 . ? 
C19B C24B 1.395(9) . ? 
C19B C20B 1.404(8) . ? 
C20B C21B 1.391(10) . ? 
C20B H20B 0.9500 . ? 
C21B C22B 1.365(10) . ? 
C21B H21B 0.9500 . ? 
C22B C23B 1.357(10) . ? 
C22B H22B 0.9500 . ? 
C23B C24B 1.381(10) . ? 
C23B H23B 0.9500 . ? 
C24B H24B 0.9500 . ? 
C25B C26B 1.467(17) . ? 
C25B H25C 0.9900 . ? 
C25B H25D 0.9900 . ? 
C26B C27B 1.61(2) . ? 
C26B H26C 0.9900 . ? 
C26B H26D 0.9900 . ? 
C27B C28B 1.485(19) . ? 
C27B H27C 0.9900 . ? 
C27B H27D 0.9900 . ? 
C28B H28C 0.9900 . ? 
C28B H28D 0.9900 . ? 
C25C C26C 1.54(4) . ? 
C25C H25E 0.9900 . ? 
C25C H25F 0.9900 . ? 
C26C C27C 1.46(4) . ? 
C26C H26E 0.9900 . ? 
C26C H26F 0.9900 . ? 
C27C C28C 1.46(4) . ? 
C27C H27E 0.9900 . ? 
C27C H27F 0.9900 . ? 
C28C H28E 0.9900 . ? 
C28C H28F 0.9900 . ? 
C29B C30B 1.517(10) . ? 
C29B H29C 0.9900 . ? 
C29B H29D 0.9900 . ? 
C30B C31B 1.476(11) . ? 
C30B H30C 0.9900 . ? 
C30B H30D 0.9900 . ? 
C31B C32B 1.533(10) . ? 
C31B H31C 0.9900 . ? 
C31B H31D 0.9900 . ? 
C32B H32C 0.9900 . ? 
C32B H32D 0.9900 . ? 
C33B C34B 1.478(9) . ? 
C33B H33B 0.9900 . ? 
C33B H33C 0.9900 . ? 
C34B C35B 1.445(11) . ? 
C34B H34C 0.9900 . ? 
C34B H34D 0.9900 . ? 
C35B C36B 1.469(9) . ? 
C35B H35C 0.9900 . ? 
C35B H35D 0.9900 . ? 
C36B H36C 0.9900 . ? 
C36B H36D 0.9900 . ? 
 
loop_ 
 _geom_angle_atom_site_label_1 
 _geom_angle_atom_site_label_2 
 _geom_angle_atom_site_label_3 
 _geom_angle 
 _geom_angle_site_symmetry_1 
 _geom_angle_site_symmetry_3 
 _geom_angle_publ_flag 
O2A Sr1A O3A 169.86(19) . . ? 
O2A Sr1A O1A 81.81(19) . . ? 
O3A Sr1A O1A 88.35(18) . . ? 
O2A Sr1A S4A 93.71(13) . . ? 
O3A Sr1A S4A 92.84(12) . . ? 
O1A Sr1A S4A 143.95(13) . . ? 
O2A Sr1A S2A 97.34(13) . . ? 
O3A Sr1A S2A 91.92(14) . . ? 
O1A Sr1A S2A 142.49(12) . . ? 
S4A Sr1A S2A 73.52(5) . . ? 
O2A Sr1A S1A 89.83(12) . . ? 
O3A Sr1A S1A 89.94(12) . . ? 
O1A Sr1A S1A 75.03(12) . . ? 
S4A Sr1A S1A 140.96(5) . . ? 
S2A Sr1A S1A 67.47(5) . . ? 
O2A Sr1A S3A 90.93(11) . . ? 
O3A Sr1A S3A 84.43(12) . . ? 
O1A Sr1A S3A 76.62(12) . . ? 
S4A Sr1A S3A 67.66(5) . . ? 
S2A Sr1A S3A 140.73(5) . . ? 
S1A Sr1A S3A 151.23(5) . . ? 
O2A Sr1A P1A 91.81(11) . . ? 
O3A Sr1A P1A 93.63(12) . . ? 
O1A Sr1A P1A 108.77(12) . . ? 
S4A Sr1A P1A 107.11(5) . . ? 
S2A Sr1A P1A 33.77(4) . . ? 
S1A Sr1A P1A 33.86(4) . . ? 
S3A Sr1A P1A 174.25(4) . . ? 
O2A Sr1A P2A 92.38(12) . . ? 
O3A Sr1A P2A 88.79(11) . . ? 
O1A Sr1A P2A 110.39(12) . . ? 
S4A Sr1A P2A 33.73(5) . . ? 
S2A Sr1A P2A 107.11(5) . . ? 
S1A Sr1A P2A 174.39(5) . . ? 
S3A Sr1A P2A 33.94(4) . . ? 
P1A Sr1A P2A 140.81(4) . . ? 
P1A S1A Sr1A 88.21(7) . . ? 
P1A S2A Sr1A 88.51(8) . . ? 
P2A S3A Sr1A 87.47(8) . . ? 
P2A S4A Sr1A 88.81(8) . . ? 
C7A P1A C1A 101.6(3) . . ? 
C7A P1A S2A 110.1(2) . . ? 
C1A P1A S2A 110.96(19) . . ? 
C7A P1A S1A 109.2(2) . . ? 
C1A P1A S1A 108.9(2) . . ? 
S2A P1A S1A 115.26(11) . . ? 
C7A P1A Sr1A 123.0(2) . . ? 
C1A P1A Sr1A 135.45(19) . . ? 
S2A P1A Sr1A 57.72(7) . . ? 
S1A P1A Sr1A 57.93(6) . . ? 
C19A P2A C13A 105.3(3) . . ? 
C19A P2A S4A 109.0(3) . . ? 
C13A P2A S4A 108.0(2) . . ? 
C19A P2A S3A 108.5(3) . . ? 
C13A P2A S3A 109.5(2) . . ? 
S4A P2A S3A 116.04(11) . . ? 
C19A P2A Sr1A 128.4(2) . . ? 
C13A P2A Sr1A 126.31(18) . . ? 
S4A P2A Sr1A 57.46(7) . . ? 
S3A P2A Sr1A 58.59(7) . . ? 
C28D O1A C25A 102.9(13) . . ? 
C28D O1A C28A 25.8(11) . . ? 
C25A O1A C28A 103.6(14) . . ? 
C28D O1A C25D 107.5(10) . . ? 
C25A O1A C25D 21.7(12) . . ? 
C28A O1A C25D 117.2(11) . . ? 
C28D O1A Sr1A 127.6(7) . . ? 
C25A O1A Sr1A 129.2(12) . . ? 
C28A O1A Sr1A 119.0(9) . . ? 
C25D O1A Sr1A 122.9(7) . . ? 
C32A O2A C29D 108.6(8) . . ? 
C32A O2A C29A 105.2(6) . . ? 
C29D O2A C29A 28.4(8) . . ? 
C32A O2A Sr1A 126.8(4) . . ? 
C29D O2A Sr1A 123.8(8) . . ? 
C29A O2A Sr1A 124.6(4) . . ? 
C33D O3A C36D 108.6(9) . . ? 
C33D O3A C36A 117.0(9) . . ? 
C36D O3A C36A 25.5(9) . . ? 
C33D O3A C33A 30.6(8) . . ? 
C36D O3A C33A 104.2(9) . . ? 
C36A O3A C33A 99.5(10) . . ? 
C33D O3A Sr1A 125.7(6) . . ? 
C36D O3A Sr1A 125.0(7) . . ? 
C36A O3A Sr1A 115.4(7) . . ? 
C33A O3A Sr1A 126.6(7) . . ? 
C6A C1A C2A 119.8(6) . . ? 
C6A C1A P1A 120.9(5) . . ? 
C2A C1A P1A 119.3(5) . . ? 
C3A C2A C1A 119.8(7) . . ? 
C3A C2A H2AA 120.1 . . ? 
C1A C2A H2AA 120.1 . . ? 
C2A C3A C4A 120.1(7) . . ? 
C2A C3A H3AA 120.0 . . ? 
C4A C3A H3AA 120.0 . . ? 
C5A C4A C3A 119.5(6) . . ? 
C5A C4A H4AA 120.2 . . ? 
C3A C4A H4AA 120.2 . . ? 
C4A C5A C6A 120.9(7) . . ? 
C4A C5A H5AA 119.5 . . ? 
C6A C5A H5AA 119.5 . . ? 
C1A C6A C5A 119.8(7) . . ? 
C1A C6A H6AA 120.1 . . ? 
C5A C6A H6AA 120.1 . . ? 
C8A C7A C12A 119.6(6) . . ? 
C8A C7A P1A 121.3(5) . . ? 
C12A C7A P1A 119.2(5) . . ? 
C7A C8A C9A 120.8(6) . . ? 
C7A C8A H8AA 119.6 . . ? 
C9A C8A H8AA 119.6 . . ? 
C10A C9A C8A 119.5(7) . . ? 
C10A C9A H9AA 120.3 . . ? 
C8A C9A H9AA 120.3 . . ? 
C9A C10A C11A 120.1(6) . . ? 
C9A C10A H10A 120.0 . . ? 
C11A C10A H10A 120.0 . . ? 
C10A C11A C12A 120.4(6) . . ? 
C10A C11A H11A 119.8 . . ? 
C12A C11A H11A 119.8 . . ? 
C7A C12A C11A 119.6(7) . . ? 
C7A C12A H12A 120.2 . . ? 
C11A C12A H12A 120.2 . . ? 
C14A C13A C18A 118.9(6) . . ? 
C14A C13A P2A 122.0(5) . . ? 
C18A C13A P2A 118.7(5) . . ? 
C13A C14A C15A 118.8(7) . . ? 
C13A C14A H14A 120.6 . . ? 
C15A C14A H14A 120.6 . . ? 
C16A C15A C14A 121.1(7) . . ? 
C16A C15A H15A 119.4 . . ? 
C14A C15A H15A 119.4 . . ? 
C15A C16A C17A 121.3(7) . . ? 
C15A C16A H16A 119.4 . . ? 
C17A C16A H16A 119.4 . . ? 
C16A C17A C18A 119.2(7) . . ? 
C16A C17A H17A 120.4 . . ? 
C18A C17A H17A 120.4 . . ? 
C17A C18A C13A 120.6(7) . . ? 
C17A C18A H18A 119.7 . . ? 
C13A C18A H18A 119.7 . . ? 
C24A C19A C20A 119.3(6) . . ? 
C24A C19A P2A 121.9(6) . . ? 
C20A C19A P2A 118.8(5) . . ? 
C19A C20A C21A 118.6(7) . . ? 
C19A C20A H20A 120.7 . . ? 
C21A C20A H20A 120.7 . . ? 
C22A C21A C20A 122.7(8) . . ? 
C22A C21A H21A 118.6 . . ? 
C20A C21A H21A 118.6 . . ? 
C23A C22A C21A 118.8(7) . . ? 
C23A C22A H22A 120.6 . . ? 
C21A C22A H22A 120.6 . . ? 
C22A C23A C24A 121.6(8) . . ? 
C22A C23A H23A 119.2 . . ? 
C24A C23A H23A 119.2 . . ? 
C19A C24A C23A 118.8(8) . . ? 
C19A C24A H24A 120.6 . . ? 
C23A C24A H24A 120.6 . . ? 
O1A C25A C26A 105.9(18) . . ? 
O1A C25A H25A 110.5 . . ? 
C26A C25A H25A 110.6 . . ? 
O1A C25A H25B 110.6 . . ? 
C26A C25A H25B 110.6 . . ? 
H25A C25A H25B 108.7 . . ? 
C27A C26A C25A 103.9(19) . . ? 
C27A C26A H26A 111.0 . . ? 
C25A C26A H26A 111.0 . . ? 
C27A C26A H26B 111.0 . . ? 
C25A C26A H26B 111.0 . . ? 
H26A C26A H26B 109.0 . . ? 
C26A C27A C28A 91.1(17) . . ? 
C26A C27A H27A 113.5 . . ? 
C28A C27A H27A 113.4 . . ? 
C26A C27A H27B 113.4 . . ? 
C28A C27A H27B 113.4 . . ? 
H27A C27A H27B 110.7 . . ? 
O1A C28A C27A 95.8(13) . . ? 
O1A C28A H28A 112.6 . . ? 
C27A C28A H28A 112.6 . . ? 
O1A C28A H28B 112.6 . . ? 
C27A C28A H28B 112.6 . . ? 
H28A C28A H28B 110.1 . . ? 
C26D C25D O1A 104.5(12) . . ? 
C26D C25D H25G 110.9 . . ? 
O1A C25D H25G 110.8 . . ? 
C26D C25D H25H 110.8 . . ? 
O1A C25D H25H 110.9 . . ? 
H25G C25D H25H 108.9 . . ? 
C25D C26D C27D 103.2(14) . . ? 
C25D C26D H26G 111.1 . . ? 
C27D C26D H26G 111.1 . . ? 
C25D C26D H26H 111.1 . . ? 
C27D C26D H26H 111.1 . . ? 
H26G C26D H26H 109.1 . . ? 
C28D C27D C26D 100.3(15) . . ? 
C28D C27D H27G 111.7 . . ? 
C26D C27D H27G 111.7 . . ? 
C28D C27D H27H 111.7 . . ? 
C26D C27D H27H 111.7 . . ? 
H27G C27D H27H 109.5 . . ? 
O1A C28D C27D 97.8(13) . . ? 
O1A C28D H28G 112.2 . . ? 
C27D C28D H28G 112.2 . . ? 
O1A C28D H28H 112.2 . . ? 
C27D C28D H28H 112.2 . . ? 
H28G C28D H28H 109.8 . . ? 
O2A C32A C31D 105.8(7) . . ? 
O2A C32A C31A 103.8(8) . . ? 
C31D C32A C31A 25.1(7) . . ? 
O2A C32A H32A 111.0 . . ? 
C31D C32A H32A 129.8 . . ? 
C31A C32A H32A 111.0 . . ? 
O2A C32A H32B 111.0 . . ? 
C31D C32A H32B 87.5 . . ? 
C31A C32A H32B 111.0 . . ? 
H32A C32A H32B 109.0 . . ? 
O2A C32A H32E 110.6 . . ? 
C31D C32A H32E 110.6 . . ? 
C31A C32A H32E 88.7 . . ? 
H32A C32A H32E 23.8 . . ? 
H32B C32A H32E 127.3 . . ? 
O2A C32A H32F 110.6 . . ? 
C31D C32A H32F 110.6 . . ? 
C31A C32A H32F 131.8 . . ? 
H32A C32A H32F 87.2 . . ? 
H32B C32A H32F 24.6 . . ? 
H32E C32A H32F 108.7 . . ? 
C30A C29A O2A 102.1(9) . . ? 
C30A C29A H29A 111.3 . . ? 
O2A C29A H29A 111.3 . . ? 
C30A C29A H29B 111.3 . . ? 
O2A C29A H29B 111.3 . . ? 
H29A C29A H29B 109.2 . . ? 
C31A C30A C29A 112.4(14) . . ? 
C31A C30A H30A 109.1 . . ? 
C29A C30A H30A 109.1 . . ? 
C31A C30A H30B 109.1 . . ? 
C29A C30A H30B 109.1 . . ? 
H30A C30A H30B 107.9 . . ? 
C30A C31A C32A 114.6(13) . . ? 
C30A C31A H31A 108.6 . . ? 
C32A C31A H31A 108.6 . . ? 
C30A C31A H31B 108.6 . . ? 
C32A C31A H31B 108.6 . . ? 
H31A C31A H31B 107.6 . . ? 
C30D C29D O2A 112.9(18) . . ? 
C30D C29D H29E 109.0 . . ? 
O2A C29D H29E 109.0 . . ? 
C30D C29D H29F 109.0 . . ? 
O2A C29D H29F 109.0 . . ? 
H29E C29D H29F 107.8 . . ? 
C29D C30D C31D 99.0(17) . . ? 
C29D C30D H30E 112.0 . . ? 
C31D C30D H30E 112.0 . . ? 
C29D C30D H30F 112.0 . . ? 
C31D C30D H30F 112.0 . . ? 
H30E C30D H30F 109.7 . . ? 
C32A C31D C30D 100.5(10) . . ? 
C32A C31D H31E 111.7 . . ? 
C30D C31D H31E 111.7 . . ? 
C32A C31D H31F 111.7 . . ? 
C30D C31D H31F 111.7 . . ? 
H31E C31D H31F 109.4 . . ? 
C34A C33A O3A 100.2(17) . . ? 
C34A C33A H33A 111.7 . . ? 
O3A C33A H33A 111.7 . . ? 
C34A C33A H33D 111.7 . . ? 
O3A C33A H33D 111.7 . . ? 
H33A C33A H33D 109.5 . . ? 
C33A C34A C35A 109(2) . . ? 
C33A C34A H34A 109.9 . . ? 
C35A C34A H34A 109.8 . . ? 
C33A C34A H34B 109.9 . . ? 
C35A C34A H34B 109.9 . . ? 
H34A C34A H34B 108.3 . . ? 
C34A C35A C36A 105.0(17) . . ? 
C34A C35A H35A 110.7 . . ? 
C36A C35A H35A 110.7 . . ? 
C34A C35A H35B 110.7 . . ? 
C36A C35A H35B 110.7 . . ? 
H35A C35A H35B 108.8 . . ? 
O3A C36A C35A 95.2(12) . . ? 
O3A C36A H36A 112.7 . . ? 
C35A C36A H36A 112.7 . . ? 
O3A C36A H36B 112.7 . . ? 
C35A C36A H36B 112.7 . . ? 
H36A C36A H36B 110.2 . . ? 
O3A C33D C34D 89.6(10) . . ? 
O3A C33D H33E 113.7 . . ? 
C34D C33D H33E 113.7 . . ? 
O3A C33D H33F 113.7 . . ? 
C34D C33D H33F 113.7 . . ? 
H33E C33D H33F 111.0 . . ? 
C35D C34D C33D 107.6(16) . . ? 
C35D C34D H34E 110.2 . . ? 
C33D C34D H34E 110.2 . . ? 
C35D C34D H34F 110.2 . . ? 
C33D C34D H34F 110.2 . . ? 
H34E C34D H34F 108.5 . . ? 
C34D C35D C36D 104.5(16) . . ? 
C34D C35D H35E 110.8 . . ? 
C36D C35D H35E 110.8 . . ? 
C34D C35D H35F 110.8 . . ? 
C36D C35D H35F 110.9 . . ? 
H35E C35D H35F 108.9 . . ? 
O3A C36D C35D 104.6(13) . . ? 
O3A C36D H36E 110.8 . . ? 
C35D C36D H36E 110.8 . . ? 
O3A C36D H36F 110.8 . . ? 
C35D C36D H36F 110.8 . . ? 
H36E C36D H36F 108.9 . . ? 
O3B Sr1B O2B 168.88(17) . . ? 
O3B Sr1B O1B 81.19(16) . . ? 
O2B Sr1B O1B 89.20(17) . . ? 
O3B Sr1B S2B 92.37(11) . . ? 
O2B Sr1B S2B 92.21(12) . . ? 
O1B Sr1B S2B 144.33(13) . . ? 
O3B Sr1B S4B 90.73(12) . . ? 
O2B Sr1B S4B 100.33(12) . . ? 
O1B Sr1B S4B 142.88(13) . . ? 
S2B Sr1B S4B 71.65(5) . . ? 
O3B Sr1B S3B 92.66(11) . . ? 
O2B Sr1B S3B 90.52(11) . . ? 
O1B Sr1B S3B 76.60(12) . . ? 
S2B Sr1B S3B 138.98(5) . . ? 
S4B Sr1B S3B 67.60(5) . . ? 
O3B Sr1B S1B 86.17(12) . . ? 
O2B Sr1B S1B 86.18(11) . . ? 
O1B Sr1B S1B 76.75(13) . . ? 
S2B Sr1B S1B 67.80(5) . . ? 
S4B Sr1B S1B 139.15(5) . . ? 
S3B Sr1B S1B 153.19(6) . . ? 
O3B Sr1B P2B 97.60(12) . . ? 
O2B Sr1B P2B 91.03(11) . . ? 
O1B Sr1B P2B 110.85(12) . . ? 
S2B Sr1B P2B 104.76(5) . . ? 
S4B Sr1B P2B 34.15(4) . . ? 
S3B Sr1B P2B 34.25(4) . . ? 
S1B Sr1B P2B 171.90(5) . . ? 
O3B Sr1B P1B 88.54(11) . . ? 
O2B Sr1B P1B 89.62(11) . . ? 
O1B Sr1B P1B 110.52(12) . . ? 
S2B Sr1B P1B 33.91(5) . . ? 
S4B Sr1B P1B 105.38(5) . . ? 
S3B Sr1B P1B 172.87(5) . . ? 
S1B Sr1B P1B 33.91(5) . . ? 
P2B Sr1B P1B 138.63(4) . . ? 
P1B S1B Sr1B 87.64(9) . . ? 
P1B S2B Sr1B 88.61(8) . . ? 
P2B S3B Sr1B 87.27(8) . . ? 
P2B S4B Sr1B 87.45(8) . . ? 
C1B P1B C7B 104.1(3) . . ? 
C1B P1B S2B 110.2(2) . . ? 
C7B P1B S2B 107.7(2) . . ? 
C1B P1B S1B 107.3(2) . . ? 
C7B P1B S1B 110.9(3) . . ? 
S2B P1B S1B 115.92(11) . . ? 
C1B P1B Sr1B 125.9(2) . . ? 
C7B P1B Sr1B 129.9(2) . . ? 
S2B P1B Sr1B 57.48(7) . . ? 
S1B P1B Sr1B 58.46(7) . . ? 
C19B P2B C13B 100.7(3) . . ? 
C19B P2B S4B 111.09(19) . . ? 
C13B P2B S4B 110.1(2) . . ? 
C19B P2B S3B 109.5(2) . . ? 
C13B P2B S3B 109.5(2) . . ? 
S4B P2B S3B 114.98(11) . . ? 
C19B P2B Sr1B 143.3(2) . . ? 
C13B P2B Sr1B 116.0(2) . . ? 
S4B P2B Sr1B 58.40(7) . . ? 
S3B P2B Sr1B 58.48(7) . . ? 
C25C O1B C28B 85.3(14) . . ? 
C25C O1B C25B 43.7(14) . . ? 
C28B O1B C25B 109.6(9) . . ? 
C25C O1B C28C 106.6(17) . . ? 
C28B O1B C28C 49.1(11) . . ? 
C25B O1B C28C 95.4(12) . . ? 
C25C O1B Sr1B 132.2(13) . . ? 
C28B O1B Sr1B 125.0(6) . . ? 
C25B O1B Sr1B 125.4(6) . . ? 
C28C O1B Sr1B 121.1(11) . . ? 
C32B O2B C29B 109.8(5) . . ? 
C32B O2B Sr1B 116.5(4) . . ? 
C29B O2B Sr1B 128.6(4) . . ? 
C36B O3B C33B 108.6(5) . . ? 
C36B O3B Sr1B 126.7(4) . . ? 
C33B O3B Sr1B 121.4(4) . . ? 
C6B C1B C2B 118.6(5) . . ? 
C6B C1B P1B 119.4(5) . . ? 
C2B C1B P1B 122.0(5) . . ? 
C3B C2B C1B 121.6(7) . . ? 
C3B C2B H2BA 119.2 . . ? 
C1B C2B H2BA 119.2 . . ? 
C2B C3B C4B 119.0(7) . . ? 
C2B C3B H3BA 120.5 . . ? 
C4B C3B H3BA 120.5 . . ? 
C3B C4B C5B 120.6(6) . . ? 
C3B C4B H4BA 119.7 . . ? 
C5B C4B H4BA 119.7 . . ? 
C4B C5B C6B 119.3(8) . . ? 
C4B C5B H5BA 120.3 . . ? 
C6B C5B H5BA 120.3 . . ? 
C1B C6B C5B 120.9(7) . . ? 
C1B C6B H6BA 119.6 . . ? 
C5B C6B H6BA 119.6 . . ? 
C8B C7B C12B 120.7(7) . . ? 
C8B C7B P1B 120.8(6) . . ? 
C12B C7B P1B 118.4(5) . . ? 
C7B C8B C9B 119.5(9) . . ? 
C7B C8B H8BA 120.2 . . ? 
C9B C8B H8BA 120.2 . . ? 
C10B C9B C8B 119.0(8) . . ? 
C10B C9B H9BA 120.5 . . ? 
C8B C9B H9BA 120.5 . . ? 
C11B C10B C9B 120.2(9) . . ? 
C11B C10B H10B 119.9 . . ? 
C9B C10B H10B 119.9 . . ? 
C10B C11B C12B 121.4(9) . . ? 
C10B C11B H11B 119.3 . . ? 
C12B C11B H11B 119.3 . . ? 
C7B C12B C11B 119.1(8) . . ? 
C7B C12B H12B 120.4 . . ? 
C11B C12B H12B 120.4 . . ? 
C14B C13B C18B 119.5(6) . . ? 
C14B C13B P2B 119.5(5) . . ? 
C18B C13B P2B 120.7(5) . . ? 
C13B C14B C15B 120.2(7) . . ? 
C13B C14B H14B 119.9 . . ? 
C15B C14B H14B 119.9 . . ? 
C16B C15B C14B 119.2(7) . . ? 
C16B C15B H15B 120.4 . . ? 
C14B C15B H15B 120.4 . . ? 
C17B C16B C15B 121.3(7) . . ? 
C17B C16B H16B 119.3 . . ? 
C15B C16B H16B 119.3 . . ? 
C16B C17B C18B 120.3(8) . . ? 
C16B C17B H17B 119.9 . . ? 
C18B C17B H17B 119.9 . . ? 
C17B C18B C13B 119.4(7) . . ? 
C17B C18B H18B 120.3 . . ? 
C13B C18B H18B 120.3 . . ? 
C24B C19B C20B 118.5(6) . . ? 
C24B C19B P2B 119.8(5) . . ? 
C20B C19B P2B 121.3(5) . . ? 
C21B C20B C19B 118.7(7) . . ? 
C21B C20B H20B 120.7 . . ? 
C19B C20B H20B 120.7 . . ? 
C22B C21B C20B 122.7(7) . . ? 
C22B C21B H21B 118.6 . . ? 
C20B C21B H21B 118.6 . . ? 
C23B C22B C21B 117.7(7) . . ? 
C23B C22B H22B 121.2 . . ? 
C21B C22B H22B 121.2 . . ? 
C22B C23B C24B 122.7(7) . . ? 
C22B C23B H23B 118.7 . . ? 
C24B C23B H23B 118.7 . . ? 
C23B C24B C19B 119.6(7) . . ? 
C23B C24B H24B 120.2 . . ? 
C19B C24B H24B 120.2 . . ? 
C26B C25B O1B 104.9(9) . . ? 
C26B C25B H25C 110.7 . . ? 
O1B C25B H25C 110.8 . . ? 
C26B C25B H25D 110.8 . . ? 
O1B C25B H25D 110.8 . . ? 
H25C C25B H25D 108.8 . . ? 
C25B C26B C27B 105.5(11) . . ? 
C25B C26B H26C 110.6 . . ? 
C27B C26B H26C 110.6 . . ? 
C25B C26B H26D 110.7 . . ? 
C27B C26B H26D 110.7 . . ? 
H26C C26B H26D 108.8 . . ? 
C28B C27B C26B 100.9(11) . . ? 
C28B C27B H27C 111.6 . . ? 
C26B C27B H27C 111.6 . . ? 
C28B C27B H27D 111.6 . . ? 
C26B C27B H27D 111.6 . . ? 
H27C C27B H27D 109.4 . . ? 
O1B C28B C27B 106.7(11) . . ? 
O1B C28B H28C 110.4 . . ? 
C27B C28B H28C 110.4 . . ? 
O1B C28B H28D 110.4 . . ? 
C27B C28B H28D 110.4 . . ? 
H28C C28B H28D 108.6 . . ? 
O1B C25C C26C 109(2) . . ? 
O1B C25C H25E 109.8 . . ? 
C26C C25C H25E 109.8 . . ? 
O1B C25C H25F 109.8 . . ? 
C26C C25C H25F 109.8 . . ? 
H25E C25C H25F 108.2 . . ? 
C27C C26C C25C 102(3) . . ? 
C27C C26C H26E 111.4 . . ? 
C25C C26C H26E 111.4 . . ? 
C27C C26C H26F 111.3 . . ? 
C25C C26C H26F 111.3 . . ? 
H26E C26C H26F 109.2 . . ? 
C28C C27C C26C 102(2) . . ? 
C28C C27C H27E 111.4 . . ? 
C26C C27C H27E 111.4 . . ? 
C28C C27C H27F 111.4 . . ? 
C26C C27C H27F 111.5 . . ? 
H27E C27C H27F 109.3 . . ? 
C27C C28C O1B 101.9(19) . . ? 
C27C C28C H28E 111.4 . . ? 
O1B C28C H28E 111.4 . . ? 
C27C C28C H28F 111.4 . . ? 
O1B C28C H28F 111.4 . . ? 
H28E C28C H28F 109.3 . . ? 
O2B C29B C30B 104.6(6) . . ? 
O2B C29B H29C 110.8 . . ? 
C30B C29B H29C 110.8 . . ? 
O2B C29B H29D 110.8 . . ? 
C30B C29B H29D 110.8 . . ? 
H29C C29B H29D 108.9 . . ? 
C31B C30B C29B 105.1(6) . . ? 
C31B C30B H30C 110.7 . . ? 
C29B C30B H30C 110.7 . . ? 
C31B C30B H30D 110.7 . . ? 
C29B C30B H30D 110.7 . . ? 
H30C C30B H30D 108.8 . . ? 
C30B C31B C32B 101.1(7) . . ? 
C30B C31B H31C 111.6 . . ? 
C32B C31B H31C 111.6 . . ? 
C30B C31B H31D 111.6 . . ? 
C32B C31B H31D 111.6 . . ? 
H31C C31B H31D 109.4 . . ? 
O2B C32B C31B 103.7(6) . . ? 
O2B C32B H32C 111.0 . . ? 
C31B C32B H32C 111.0 . . ? 
O2B C32B H32D 111.0 . . ? 
C31B C32B H32D 111.0 . . ? 
H32C C32B H32D 109.0 . . ? 
O3B C33B C34B 108.8(7) . . ? 
O3B C33B H33B 109.9 . . ? 
C34B C33B H33B 109.9 . . ? 
O3B C33B H33C 109.9 . . ? 
C34B C33B H33C 109.9 . . ? 
H33B C33B H33C 108.3 . . ? 
C35B C34B C33B 103.8(6) . . ? 
C35B C34B H34C 111.0 . . ? 
C33B C34B H34C 111.0 . . ? 
C35B C34B H34D 111.0 . . ? 
C33B C34B H34D 111.0 . . ? 
H34C C34B H34D 109.0 . . ? 
C34B C35B C36B 109.4(7) . . ? 
C34B C35B H35C 109.8 . . ? 
C36B C35B H35C 109.8 . . ? 
C34B C35B H35D 109.8 . . ? 
C36B C35B H35D 109.8 . . ? 
H35C C35B H35D 108.2 . . ? 
O3B C36B C35B 106.6(6) . . ? 
O3B C36B H36C 110.4 . . ? 
C35B C36B H36C 110.4 . . ? 
O3B C36B H36D 110.4 . . ? 
C35B C36B H36D 110.4 . . ? 
H36C C36B H36D 108.6 . . ? 
 
_diffrn_measured_fraction_theta_max    0.996 
_diffrn_reflns_theta_full              27.50 
_diffrn_measured_fraction_theta_full   0.996 
_refine_diff_density_max    0.425 
_refine_diff_density_min   -0.344 
_refine_diff_density_rms    0.075 
 

#=== END


data_FO3891 
 
_audit_creation_method            SHELXL-97 
_chemical_name_systematic 
? 
_chemical_name_common             ? 
_chemical_melting_point           ? 
_chemical_formula_moiety          'C36 H44 O3 P2 Se4 Sr'
_chemical_formula_sum             'C36 H44 O3 P2 Se4 Sr' 
_chemical_formula_weight          990.11 
 
loop_ 
 _atom_type_symbol 
 _atom_type_description 
 _atom_type_scat_dispersion_real 
 _atom_type_scat_dispersion_imag 
 _atom_type_scat_source 
 'C'  'C'   0.0033   0.0016 
 'International Tables Vol C Tables 4.2.6.8 and 6.1.1.4' 
 'H'  'H'   0.0000   0.0000 
 'International Tables Vol C Tables 4.2.6.8 and 6.1.1.4' 
 'O'  'O'   0.0106   0.0060 
 'International Tables Vol C Tables 4.2.6.8 and 6.1.1.4' 
 'P'  'P'   0.1023   0.0942 
 'International Tables Vol C Tables 4.2.6.8 and 6.1.1.4' 
 'Se'  'Se'  -0.0929   2.2259 
 'International Tables Vol C Tables 4.2.6.8 and 6.1.1.4' 
 'Sr'  'Sr'  -1.5307   3.2498 
 'International Tables Vol C Tables 4.2.6.8 and 6.1.1.4' 
 
_symmetry_cell_setting            monoclinic
_symmetry_space_group_name_H-M    'P 21/n'
_symmetry_space_group_name_Hall   '-P 2yn'
 
loop_ 
 _symmetry_equiv_pos_as_xyz 
 'x, y, z' 
 '-x+1/2, y+1/2, -z+1/2' 
 '-x, -y, -z' 
 'x-1/2, -y-1/2, z-1/2' 
 
_cell_length_a                    17.2391(3) 
_cell_length_b                    32.1960(4) 
_cell_length_c                    21.9626(4) 
_cell_angle_alpha                 90.00 
_cell_angle_beta                  102.443(1) 
_cell_angle_gamma                 90.00 
_cell_volume                      11903.6(3) 
_cell_formula_units_Z             12 
_cell_measurement_temperature     183(2) 
_cell_measurement_reflns_used     71584
_cell_measurement_theta_min       1.75 
_cell_measurement_theta_max       27.51
 
_exptl_crystal_description        prism 
_exptl_crystal_colour             colourless
_exptl_crystal_size_max           0.05 
_exptl_crystal_size_mid           0.04 
_exptl_crystal_size_min           0.04 
_exptl_crystal_density_meas       ? 
_exptl_crystal_density_diffrn     1.657 
_exptl_crystal_density_method     'not measured' 
_exptl_crystal_F_000              5856 
_exptl_absorpt_coefficient_mu     5.141 
_exptl_absorpt_correction_type    none 
_exptl_absorpt_correction_T_min   ?
_exptl_absorpt_correction_T_max   ?
_exptl_absorpt_process_details    ? 
 
_exptl_special_details 
? 
 
_diffrn_ambient_temperature       183(2) 
_diffrn_radiation_wavelength      0.71073 
_diffrn_radiation_type            MoK\a 
_diffrn_radiation_source          'fine-focus sealed tube' 
_diffrn_radiation_monochromator   graphite 
_diffrn_measurement_device_type   KappaCCD 
_diffrn_measurement_method        'phi- + omega-scan'
_diffrn_detector_area_resol_mean  ? 
_diffrn_standards_number          ? 
_diffrn_standards_interval_count  ? 
_diffrn_standards_interval_time   ? 
_diffrn_standards_decay_%         ? 
_diffrn_reflns_number             71584 
_diffrn_reflns_av_R_equivalents   0.1144 
_diffrn_reflns_av_sigmaI/netI     0.1458 
_diffrn_reflns_limit_h_min        -22 
_diffrn_reflns_limit_h_max        18 
_diffrn_reflns_limit_k_min        -41 
_diffrn_reflns_limit_k_max        41 
_diffrn_reflns_limit_l_min        -28 
_diffrn_reflns_limit_l_max        28 
_diffrn_reflns_theta_min          1.75 
_diffrn_reflns_theta_max          27.51 
_reflns_number_total              26636 
_reflns_number_gt                 13934 
_reflns_threshold_expression      >2sigma(I) 
 
_computing_data_collection        COLLECT
_computing_cell_refinement        DENZO
_computing_data_reduction         DENZO
_computing_structure_solution     'SHELXS-97 (Sheldrick, 1990)' 
_computing_structure_refinement   'SHELXL-97 (Sheldrick, 1997)' 
_computing_molecular_graphics     SHELXTL/PC
_computing_publication_material   SHELXL-97
 
_refine_special_details 
; 
 Refinement of F^2^ against ALL reflections.  The weighted R-factor wR and 
 goodness of fit S are based on F^2^, conventional R-factors R are based 
 on F, with F set to zero for negative F^2^. The threshold expression of 
 F^2^ > 2sigma(F^2^) is used only for calculating R-factors(gt) etc. and is 
 not relevant to the choice of reflections for refinement.  R-factors based 
 on F^2^ are statistically about twice as large as those based on F, and R- 
 factors based on ALL data will be even larger. 
; 
 
_refine_ls_structure_factor_coef  Fsqd  
_refine_ls_matrix_type            full 
_refine_ls_weighting_scheme       calc  
_refine_ls_weighting_details 
 'calc w=1/[\s^2^(Fo^2^)+(0.0373P)^2^+0.0000P] where P=(Fo^2^+2Fc^2^)/3' 
_atom_sites_solution_primary      direct 
_atom_sites_solution_secondary    difmap 
_atom_sites_solution_hydrogens    geom 
_refine_ls_hydrogen_treatment     constr
_refine_ls_extinction_method      none 
_refine_ls_extinction_coef        ? 
_refine_ls_number_reflns          26636 
_refine_ls_number_parameters      1187 
_refine_ls_number_restraints      0 
_refine_ls_R_factor_all           0.1485 
_refine_ls_R_factor_gt            0.0580 
_refine_ls_wR_factor_ref          0.1059 
_refine_ls_wR_factor_gt           0.0916 
_refine_ls_goodness_of_fit_ref    0.924 
_refine_ls_restrained_S_all       0.924 
_refine_ls_shift/su_max           0.005 
_refine_ls_shift/su_mean          0.000 
 
loop_ 
 _atom_site_label 
 _atom_site_type_symbol 
 _atom_site_fract_x 
 _atom_site_fract_y 
 _atom_site_fract_z 
 _atom_site_U_iso_or_equiv 
 _atom_site_adp_type 
 _atom_site_occupancy 
 _atom_site_symmetry_multiplicity 
 _atom_site_calc_flag 
 _atom_site_refinement_flags 
 _atom_site_disorder_assembly 
 _atom_site_disorder_group 
Sr1A Sr -0.26358(3) 0.217892(14) 0.50417(2) 0.02373(14) Uani 1 1 d . . . 
Se1A Se -0.38791(4) 0.191897(15) 0.58534(2) 0.02952(16) Uani 1 1 d . . . 
Se2A Se -0.33157(4) 0.297708(16) 0.55816(3) 0.03421(17) Uani 1 1 d . . . 
Se3A Se -0.13815(4) 0.201407(16) 0.42100(3) 0.03347(17) Uani 1 1 d . . . 
Se4A Se -0.26108(4) 0.293176(16) 0.41086(2) 0.02745(15) Uani 1 1 d . . . 
P1A P -0.38526(10) 0.25600(4) 0.61392(6) 0.0262(4) Uani 1 1 d . . . 
P2A P -0.17997(10) 0.25733(4) 0.37057(6) 0.0234(4) Uani 1 1 d . . . 
O1A O -0.2196(3) 0.14213(11) 0.52997(17) 0.0418(12) Uani 1 1 d . . . 
O2A O -0.1432(3) 0.22981(13) 0.59212(17) 0.0488(12) Uani 1 1 d . . . 
O3A O -0.3807(2) 0.19259(11) 0.42373(15) 0.0348(11) Uani 1 1 d . . . 
C1A C -0.4859(3) 0.27313(14) 0.6129(2) 0.0254(14) Uani 1 1 d . . . 
C2A C -0.5212(4) 0.26793(18) 0.6632(3) 0.0417(17) Uani 1 1 d . . . 
H2AA H -0.4917 0.2555 0.7003 0.050 Uiso 1 1 calc R . . 
C3A C -0.5981(4) 0.28035(19) 0.6606(3) 0.0485(19) Uani 1 1 d . . . 
H3AA H -0.6212 0.2761 0.6957 0.058 Uiso 1 1 calc R . . 
C4A C -0.6415(4) 0.29857(17) 0.6086(3) 0.0394(17) Uani 1 1 d . . . 
H4AA H -0.6941 0.3079 0.6074 0.047 Uiso 1 1 calc R . . 
C5A C -0.6084(5) 0.3033(2) 0.5581(3) 0.061(2) Uani 1 1 d . . . 
H5AA H -0.6388 0.3153 0.5211 0.073 Uiso 1 1 calc R . . 
C6A C -0.5307(4) 0.2908(2) 0.5600(3) 0.056(2) Uani 1 1 d . . . 
H6AA H -0.5084 0.2944 0.5244 0.067 Uiso 1 1 calc R . . 
C7A C -0.3336(3) 0.26054(15) 0.6957(2) 0.0237(14) Uani 1 1 d . . . 
C8A C -0.3150(4) 0.29947(16) 0.7215(3) 0.0370(16) Uani 1 1 d . . . 
H8AA H -0.3328 0.3236 0.6976 0.044 Uiso 1 1 calc R . . 
C9A C -0.2709(4) 0.30356(17) 0.7815(3) 0.0451(19) Uani 1 1 d . . . 
H9AA H -0.2579 0.3304 0.7985 0.054 Uiso 1 1 calc R . . 
C10A C -0.2457(4) 0.26879(18) 0.8166(3) 0.0432(18) Uani 1 1 d . . . 
H10A H -0.2157 0.2716 0.8581 0.052 Uiso 1 1 calc R . . 
C11A C -0.2642(4) 0.22964(17) 0.7916(3) 0.0416(18) Uani 1 1 d . . . 
H11A H -0.2466 0.2057 0.8158 0.050 Uiso 1 1 calc R . . 
C12A C -0.3081(4) 0.22539(15) 0.7315(2) 0.0332(16) Uani 1 1 d . . . 
H12A H -0.3209 0.1985 0.7146 0.040 Uiso 1 1 calc R . . 
C13A C -0.0947(3) 0.28773(15) 0.3632(2) 0.0239(14) Uani 1 1 d . . . 
C14A C -0.0443(4) 0.27390(18) 0.3261(2) 0.0385(17) Uani 1 1 d . . . 
H14A H -0.0573 0.2495 0.3017 0.046 Uiso 1 1 calc R . . 
C15A C 0.0247(4) 0.2953(2) 0.3244(3) 0.0449(18) Uani 1 1 d . . . 
H15A H 0.0587 0.2853 0.2988 0.054 Uiso 1 1 calc R . . 
C16A C 0.0450(4) 0.33077(19) 0.3589(3) 0.0437(18) Uani 1 1 d . . . 
H16A H 0.0928 0.3452 0.3581 0.052 Uiso 1 1 calc R . . 
C17A C -0.0060(4) 0.34462(17) 0.3943(3) 0.0452(19) Uani 1 1 d . . . 
H17A H 0.0069 0.3694 0.4178 0.054 Uiso 1 1 calc R . . 
C18A C -0.0754(4) 0.32421(16) 0.3976(3) 0.0353(16) Uani 1 1 d . . . 
H18A H -0.1093 0.3348 0.4227 0.042 Uiso 1 1 calc R . . 
C19A C -0.2286(3) 0.24439(14) 0.2903(2) 0.0213(13) Uani 1 1 d . . . 
C20A C -0.2409(4) 0.20385(16) 0.2701(2) 0.0326(16) Uani 1 1 d . . . 
H20A H -0.2209 0.1816 0.2975 0.039 Uiso 1 1 calc R . . 
C21A C -0.2826(4) 0.19552(17) 0.2098(3) 0.0401(18) Uani 1 1 d . . . 
H21A H -0.2915 0.1676 0.1962 0.048 Uiso 1 1 calc R . . 
C22A C -0.3109(4) 0.22728(18) 0.1700(3) 0.0378(17) Uani 1 1 d . . . 
H22A H -0.3405 0.2214 0.1292 0.045 Uiso 1 1 calc R . . 
C23A C -0.2965(4) 0.26824(18) 0.1891(2) 0.0395(17) Uani 1 1 d . . . 
H23A H -0.3141 0.2904 0.1610 0.047 Uiso 1 1 calc R . . 
C24A C -0.2566(4) 0.27643(15) 0.2493(2) 0.0330(16) Uani 1 1 d . . . 
H24A H -0.2481 0.3044 0.2629 0.040 Uiso 1 1 calc R . . 
C25A C -0.2000(5) 0.12748(18) 0.5928(3) 0.061(2) Uani 1 1 d . . . 
H25A H -0.2491 0.1222 0.6082 0.073 Uiso 1 1 calc R . . 
H25B H -0.1678 0.1484 0.6202 0.073 Uiso 1 1 calc R . . 
C26A C -0.1551(5) 0.0891(2) 0.5933(3) 0.089(2) Uani 1 1 d . . . 
H26A H -0.0984 0.0938 0.6129 0.107 Uiso 1 1 calc R . . 
H26B H -0.1761 0.0674 0.6172 0.107 Uiso 1 1 calc R . . 
C27A C -0.1629(6) 0.0768(2) 0.5314(3) 0.089(2) Uani 1 1 d . . . 
H27A H -0.1956 0.0513 0.5236 0.107 Uiso 1 1 calc R . . 
H27B H -0.1100 0.0706 0.5231 0.107 Uiso 1 1 calc R . . 
C28A C -0.2006(5) 0.10983(17) 0.4903(3) 0.059(2) Uani 1 1 d . . . 
H28A H -0.1640 0.1204 0.4648 0.071 Uiso 1 1 calc R . . 
H28B H -0.2495 0.0995 0.4620 0.071 Uiso 1 1 calc R . . 
C29A C -0.0623(5) 0.2225(3) 0.5937(3) 0.087(2) Uani 1 1 d . . . 
H29A H -0.0462 0.2367 0.5585 0.104 Uiso 1 1 calc R . . 
H29B H -0.0524 0.1924 0.5907 0.104 Uiso 1 1 calc R . . 
C30A C -0.0167(6) 0.2391(3) 0.6540(4) 0.103(3) Uiso 1 1 d . . . 
H30A H 0.0209 0.2180 0.6760 0.124 Uiso 1 1 calc R . . 
H30B H 0.0137 0.2641 0.6471 0.124 Uiso 1 1 calc R . . 
C31A C -0.0731(6) 0.2489(3) 0.6884(5) 0.118(3) Uiso 1 1 d . . . 
H31A H -0.0675 0.2785 0.7008 0.141 Uiso 1 1 calc R . . 
H31B H -0.0635 0.2320 0.7269 0.141 Uiso 1 1 calc R . . 
C32A C -0.1506(5) 0.2417(3) 0.6540(3) 0.087(2) Uani 1 1 d . . . 
H32A H -0.1832 0.2672 0.6523 0.104 Uiso 1 1 calc R . . 
H32B H -0.1762 0.2193 0.6734 0.104 Uiso 1 1 calc R . . 
C33A C -0.3827(4) 0.16973(18) 0.3674(2) 0.0449(18) Uani 1 1 d . . . 
H33A H -0.4057 0.1417 0.3697 0.054 Uiso 1 1 calc R . . 
H33B H -0.3288 0.1669 0.3590 0.054 Uiso 1 1 calc R . . 
C34A C -0.4355(4) 0.1959(2) 0.3176(3) 0.062(2) Uani 1 1 d . . . 
H34A H -0.4043 0.2180 0.3025 0.075 Uiso 1 1 calc R . . 
H34B H -0.4614 0.1785 0.2818 0.075 Uiso 1 1 calc R . . 
C35A C -0.4959(4) 0.21439(19) 0.3494(3) 0.050(2) Uani 1 1 d . . . 
H35A H -0.5457 0.1981 0.3403 0.060 Uiso 1 1 calc R . . 
H35B H -0.5080 0.2434 0.3357 0.060 Uiso 1 1 calc R . . 
C36A C -0.4571(4) 0.21259(18) 0.4187(3) 0.0444(18) Uani 1 1 d . . . 
H36A H -0.4500 0.2410 0.4365 0.053 Uiso 1 1 calc R . . 
H36B H -0.4905 0.1965 0.4416 0.053 Uiso 1 1 calc R . . 
Sr1B Sr 0.23468(3) -0.051421(14) 0.00282(2) 0.02518(14) Uani 1 1 d . . . 
Se1B Se 0.37010(4) -0.018176(15) -0.06368(3) 0.03074(16) Uani 1 1 d . . . 
Se2B Se 0.30989(4) -0.125309(16) -0.06120(3) 0.03269(17) Uani 1 1 d . . . 
Se3B Se 0.11972(4) -0.035590(16) 0.10033(2) 0.03122(16) Uani 1 1 d . . . 
Se4B Se 0.22678(4) -0.130574(16) 0.08464(2) 0.02972(16) Uani 1 1 d . . . 
P1B P 0.38481(10) -0.08074(4) -0.09322(6) 0.0254(4) Uani 1 1 d . . . 
P2B P 0.16845(10) -0.09319(4) 0.14257(6) 0.0240(4) Uani 1 1 d . . . 
O1B O 0.1847(3) 0.02154(11) -0.02983(16) 0.0396(11) Uani 1 1 d . . . 
O2B O 0.3397(3) -0.02651(11) 0.09463(16) 0.0411(12) Uani 1 1 d . . . 
O3B O 0.1087(3) -0.06896(13) -0.07919(18) 0.0494(12) Uani 1 1 d . . . 
C1B C 0.3660(4) -0.08022(14) -0.1782(2) 0.0245(14) Uani 1 1 d . . . 
C2B C 0.4264(4) -0.07557(16) -0.2094(2) 0.0378(17) Uani 1 1 d . . . 
H2BA H 0.4799 -0.0757 -0.1865 0.045 Uiso 1 1 calc R . . 
C3B C 0.4110(4) -0.07066(18) -0.2743(3) 0.0469(19) Uani 1 1 d . . . 
H3BA H 0.4535 -0.0673 -0.2951 0.056 Uiso 1 1 calc R . . 
C4B C 0.3334(5) -0.07083(18) -0.3076(3) 0.048(2) Uani 1 1 d . . . 
H4BA H 0.3221 -0.0670 -0.3515 0.058 Uiso 1 1 calc R . . 
C5B C 0.2735(5) -0.07647(18) -0.2774(3) 0.049(2) Uani 1 1 d . . . 
H5BA H 0.2202 -0.0773 -0.3005 0.059 Uiso 1 1 calc R . . 
C6B C 0.2892(4) -0.08110(16) -0.2128(3) 0.0372(17) Uani 1 1 d . . . 
H6BA H 0.2465 -0.0849 -0.1924 0.045 Uiso 1 1 calc R . . 
C7B C 0.4876(4) -0.09737(15) -0.0688(2) 0.0271(15) Uani 1 1 d . . . 
C8B C 0.5087(4) -0.13753(16) -0.0818(3) 0.0368(17) Uani 1 1 d . . . 
H8BA H 0.4693 -0.1558 -0.1041 0.044 Uiso 1 1 calc R . . 
C9B C 0.5857(4) -0.15131(18) -0.0628(3) 0.049(2) Uani 1 1 d . . . 
H9BA H 0.5989 -0.1790 -0.0716 0.058 Uiso 1 1 calc R . . 
C10B C 0.6437(4) -0.12512(18) -0.0310(3) 0.0398(17) Uani 1 1 d . . . 
H10C H 0.6971 -0.1344 -0.0183 0.048 Uiso 1 1 calc R . . 
C11B C 0.6234(4) -0.08572(18) -0.0179(3) 0.0394(17) Uani 1 1 d . . . 
H11C H 0.6627 -0.0678 0.0052 0.047 Uiso 1 1 calc R . . 
C12B C 0.5463(4) -0.07148(16) -0.0376(2) 0.0352(17) Uani 1 1 d . . . 
H12C H 0.5339 -0.0435 -0.0296 0.042 Uiso 1 1 calc R . . 
C13B C 0.2375(3) -0.08221(15) 0.2165(2) 0.0238(14) Uani 1 1 d . . . 
C14B C 0.2307(4) -0.04631(16) 0.2498(2) 0.0323(15) Uani 1 1 d . . . 
H14C H 0.1906 -0.0266 0.2335 0.039 Uiso 1 1 calc R . . 
C15B C 0.2818(4) -0.03902(18) 0.3064(3) 0.0433(18) Uani 1 1 d . . . 
H15C H 0.2766 -0.0144 0.3291 0.052 Uiso 1 1 calc R . . 
C16B C 0.3404(4) -0.06739(17) 0.3301(2) 0.0387(18) Uani 1 1 d . . . 
H16C H 0.3760 -0.0621 0.3688 0.046 Uiso 1 1 calc R . . 
C17B C 0.3475(4) -0.10323(17) 0.2979(3) 0.0410(18) Uani 1 1 d . . . 
H17C H 0.3874 -0.1230 0.3146 0.049 Uiso 1 1 calc R . . 
C18B C 0.2963(4) -0.11060(15) 0.2407(2) 0.0300(15) Uani 1 1 d . . . 
H18C H 0.3017 -0.1352 0.2182 0.036 Uiso 1 1 calc R . . 
C19B C 0.0888(3) -0.12300(14) 0.1647(2) 0.0248(14) Uani 1 1 d . . . 
C20B C 0.0418(3) -0.14935(15) 0.1214(3) 0.0301(15) Uani 1 1 d . . . 
H20C H 0.0543 -0.1533 0.0817 0.036 Uiso 1 1 calc R . . 
C21B C -0.0225(4) -0.16970(16) 0.1355(3) 0.0396(17) Uani 1 1 d . . . 
H21C H -0.0549 -0.1869 0.1051 0.048 Uiso 1 1 calc R . . 
C22B C -0.0397(4) -0.16523(16) 0.1923(3) 0.0414(17) Uani 1 1 d . . . 
H22C H -0.0833 -0.1799 0.2020 0.050 Uiso 1 1 calc R . . 
C23B C 0.0060(4) -0.13940(19) 0.2369(3) 0.0460(19) Uani 1 1 d . . . 
H23C H -0.0066 -0.1361 0.2767 0.055 Uiso 1 1 calc R . . 
C24B C 0.0701(4) -0.11852(17) 0.2224(3) 0.0354(16) Uani 1 1 d . . . 
H24C H 0.1016 -0.1009 0.2526 0.042 Uiso 1 1 calc R . . 
C25B C 0.1637(5) 0.03388(19) -0.0938(3) 0.077(2) Uani 1 1 d . . . 
H25E H 0.1228 0.0149 -0.1173 0.092 Uiso 1 1 calc R . . 
H25F H 0.2109 0.0327 -0.1126 0.092 Uiso 1 1 calc R . . 
C26B C 0.1333(5) 0.0756(2) -0.0969(3) 0.077(2) Uani 1 1 d . . . 
H26E H 0.1707 0.0948 -0.1110 0.092 Uiso 1 1 calc R . . 
H26F H 0.0815 0.0771 -0.1270 0.092 Uiso 1 1 calc R . . 
C27B C 0.1239(5) 0.08701(18) -0.0364(3) 0.063(2) Uani 1 1 d . . . 
H27E H 0.0670 0.0915 -0.0366 0.076 Uiso 1 1 calc R . . 
H27F H 0.1531 0.1130 -0.0229 0.076 Uiso 1 1 calc R . . 
C28B C 0.1559(4) 0.05274(17) 0.0060(3) 0.054(2) Uani 1 1 d . . . 
H28E H 0.1997 0.0629 0.0396 0.065 Uiso 1 1 calc R . . 
H28F H 0.1139 0.0411 0.0254 0.065 Uiso 1 1 calc R . . 
C29B C 0.3420(4) 0.00557(16) 0.1399(2) 0.0402(18) Uani 1 1 d . . . 
H29E H 0.2903 0.0076 0.1524 0.048 Uiso 1 1 calc R . . 
H29F H 0.3540 0.0327 0.1228 0.048 Uiso 1 1 calc R . . 
C30B C 0.4061(5) -0.0062(2) 0.1945(3) 0.064(2) Uani 1 1 d . . . 
H30E H 0.4335 0.0188 0.2151 0.076 Uiso 1 1 calc R . . 
H30F H 0.3844 -0.0223 0.2254 0.076 Uiso 1 1 calc R . . 
C31B C 0.4598(5) -0.0315(3) 0.1668(3) 0.095(3) Uani 1 1 d . . . 
H31E H 0.5022 -0.0140 0.1560 0.114 Uiso 1 1 calc R . . 
H31F H 0.4848 -0.0533 0.1962 0.114 Uiso 1 1 calc R . . 
C32B C 0.4113(4) -0.0500(2) 0.1108(3) 0.061(2) Uani 1 1 d . . . 
H32E H 0.4399 -0.0493 0.0763 0.073 Uiso 1 1 calc R . . 
H32F H 0.3991 -0.0793 0.1188 0.073 Uiso 1 1 calc R . . 
C33B C 0.0948(5) -0.0830(2) -0.1425(3) 0.065(2) Uani 1 1 d . . . 
H33E H 0.1318 -0.1058 -0.1467 0.078 Uiso 1 1 calc R . . 
H33F H 0.1028 -0.0600 -0.1704 0.078 Uiso 1 1 calc R . . 
C34B C 0.0107(5) -0.0980(3) -0.1591(4) 0.091(3) Uani 1 1 d . . . 
H34E H -0.0172 -0.0851 -0.1987 0.110 Uiso 1 1 calc R . . 
H34F H 0.0098 -0.1285 -0.1648 0.110 Uiso 1 1 calc R . . 
C35B C -0.0279(7) -0.0874(3) -0.1108(5) 0.134(3) Uiso 1 1 d . . . 
H35E H -0.0563 -0.1115 -0.0982 0.161 Uiso 1 1 calc R . . 
H35F H -0.0661 -0.0644 -0.1236 0.161 Uiso 1 1 calc R . . 
C36B C 0.0363(7) -0.0747(3) -0.0617(5) 0.134(3) Uiso 1 1 d . . . 
H36E H 0.0214 -0.0484 -0.0440 0.161 Uiso 1 1 calc R . . 
H36F H 0.0436 -0.0959 -0.0283 0.161 Uiso 1 1 calc R . . 
Sr1C Sr 0.20648(4) 0.116544(15) 0.50812(2) 0.02622(14) Uani 1 1 d . . . 
Se1C Se 0.33972(4) 0.151536(16) 0.44057(3) 0.03226(16) Uani 1 1 d . . . 
Se2C Se 0.26906(4) 0.045705(16) 0.43080(3) 0.03217(16) Uani 1 1 d . . . 
Se3C Se 0.08817(4) 0.125210(16) 0.60262(2) 0.03132(16) Uani 1 1 d . . . 
Se4C Se 0.17695(4) 0.029368(17) 0.56552(3) 0.04111(19) Uani 1 1 d . . . 
P1C P 0.34861(10) 0.09010(4) 0.40424(6) 0.0256(4) Uani 1 1 d . . . 
P2C P 0.13285(10) 0.06442(4) 0.63434(6) 0.0279(4) Uani 1 1 d . . . 
O1C O 0.1755(3) 0.19458(11) 0.50270(18) 0.0423(11) Uani 1 1 d . . . 
O2C O 0.0848(3) 0.11857(12) 0.41953(17) 0.0450(12) Uani 1 1 d . . . 
O3C O 0.3207(3) 0.12494(12) 0.60007(17) 0.0455(12) Uani 1 1 d . . . 
C1C C 0.3328(4) 0.09373(15) 0.3190(2) 0.0252(14) Uani 1 1 d . . . 
C2C C 0.2621(4) 0.07951(16) 0.2820(3) 0.0377(17) Uani 1 1 d . . . 
H2CA H 0.2242 0.0654 0.3001 0.045 Uiso 1 1 calc R . . 
C3C C 0.2477(4) 0.08638(19) 0.2172(3) 0.0481(19) Uani 1 1 d . . . 
H3CA H 0.1997 0.0768 0.1912 0.058 Uiso 1 1 calc R . . 
C4C C 0.3032(5) 0.10693(18) 0.1916(3) 0.046(2) Uani 1 1 d . . . 
H4CA H 0.2930 0.1119 0.1480 0.055 Uiso 1 1 calc R . . 
C5C C 0.3727(4) 0.12020(18) 0.2288(3) 0.0454(18) Uani 1 1 d . . . 
H5CA H 0.4112 0.1339 0.2109 0.054 Uiso 1 1 calc R . . 
C6C C 0.3875(4) 0.11375(16) 0.2929(3) 0.0384(17) Uani 1 1 d . . . 
H6CA H 0.4358 0.1233 0.3185 0.046 Uiso 1 1 calc R . . 
C7C C 0.4492(4) 0.07047(17) 0.4273(2) 0.0329(15) Uani 1 1 d . . . 
C8C C 0.5079(4) 0.0935(2) 0.4662(3) 0.0490(19) Uani 1 1 d . . . 
H8CA H 0.4956 0.1201 0.4802 0.059 Uiso 1 1 calc R . . 
C9C C 0.5844(5) 0.0776(3) 0.4849(3) 0.063(2) Uani 1 1 d . . . 
H9CA H 0.6242 0.0931 0.5123 0.076 Uiso 1 1 calc R . . 
C10C C 0.6018(5) 0.0402(3) 0.4638(4) 0.071(3) Uani 1 1 d . . . 
H10B H 0.6543 0.0296 0.4758 0.085 Uiso 1 1 calc R . . 
C11C C 0.5441(5) 0.0172(2) 0.4249(4) 0.081(3) Uani 1 1 d . . . 
H11B H 0.5567 -0.0097 0.4118 0.097 Uiso 1 1 calc R . . 
C12C C 0.4681(5) 0.03279(19) 0.4050(3) 0.063(2) Uani 1 1 d . . . 
H12B H 0.4294 0.0176 0.3762 0.076 Uiso 1 1 calc R . . 
C13C C 0.0549(4) 0.03463(15) 0.6589(2) 0.0283(15) Uani 1 1 d . . . 
C14C C 0.0450(4) 0.03610(17) 0.7200(3) 0.0451(19) Uani 1 1 d . . . 
H14B H 0.0803 0.0524 0.7499 0.054 Uiso 1 1 calc R . . 
C15C C -0.0155(4) 0.01429(19) 0.7383(3) 0.054(2) Uani 1 1 d . . . 
H15B H -0.0209 0.0149 0.7804 0.065 Uiso 1 1 calc R . . 
C16C C -0.0677(4) -0.00823(17) 0.6942(4) 0.054(2) Uani 1 1 d . . . 
H16B H -0.1102 -0.0227 0.7059 0.065 Uiso 1 1 calc R . . 
C17C C -0.0590(4) -0.01006(17) 0.6340(4) 0.051(2) Uani 1 1 d . . . 
H17B H -0.0949 -0.0262 0.6043 0.061 Uiso 1 1 calc R . . 
C18C C 0.0022(4) 0.01162(16) 0.6158(3) 0.0395(18) Uani 1 1 d . . . 
H18B H 0.0077 0.0105 0.5737 0.047 Uiso 1 1 calc R . . 
C19C C 0.2094(3) 0.06891(15) 0.7057(2) 0.0264(14) Uani 1 1 d . . . 
C20C C 0.2163(4) 0.10369(16) 0.7425(2) 0.0368(17) Uani 1 1 d . . . 
H20B H 0.1832 0.1270 0.7292 0.044 Uiso 1 1 calc R . . 
C21C C 0.2711(4) 0.10517(18) 0.7988(3) 0.0420(18) Uani 1 1 d . . . 
H21B H 0.2743 0.1292 0.8242 0.050 Uiso 1 1 calc R . . 
C22C C 0.3209(4) 0.07225(18) 0.8181(3) 0.0466(19) Uani 1 1 d . . . 
H22B H 0.3594 0.0736 0.8561 0.056 Uiso 1 1 calc R . . 
C23C C 0.3139(4) 0.03711(17) 0.7811(3) 0.0422(18) Uani 1 1 d . . . 
H23B H 0.3473 0.0139 0.7942 0.051 Uiso 1 1 calc R . . 
C24C C 0.2588(4) 0.03547(16) 0.7252(3) 0.0358(17) Uani 1 1 d . . . 
H24B H 0.2548 0.0112 0.7001 0.043 Uiso 1 1 calc R . . 
C25C C 0.2265(4) 0.22922(17) 0.5050(3) 0.0482(19) Uani 1 1 d . . . 
H25C H 0.2698 0.2230 0.4831 0.058 Uiso 1 1 calc R . . 
H25D H 0.2504 0.2367 0.5487 0.058 Uiso 1 1 calc R . . 
C26C C 0.1755(4) 0.26369(18) 0.4732(3) 0.058(2) Uani 1 1 d . . . 
H26C H 0.1947 0.2909 0.4915 0.069 Uiso 1 1 calc R . . 
H26D H 0.1751 0.2641 0.4280 0.069 Uiso 1 1 calc R . . 
C27C C 0.0958(4) 0.25441(17) 0.4839(3) 0.051(2) Uani 1 1 d . . . 
H27C H 0.0852 0.2708 0.5194 0.061 Uiso 1 1 calc R . . 
H27D H 0.0544 0.2609 0.4463 0.061 Uiso 1 1 calc R . . 
C28C C 0.0967(5) 0.20995(19) 0.4977(4) 0.080(3) Uani 1 1 d . . . 
H28C H 0.0794 0.2052 0.5374 0.096 Uiso 1 1 calc R . . 
H28D H 0.0596 0.1951 0.4641 0.096 Uiso 1 1 calc R . . 
C29C C 0.0037(4) 0.10740(19) 0.4179(3) 0.0494(19) Uani 1 1 d . . . 
H29C H -0.0196 0.1258 0.4453 0.059 Uiso 1 1 calc R . . 
H29D H 0.0001 0.0783 0.4316 0.059 Uiso 1 1 calc R . . 
C30C C -0.0398(5) 0.1127(2) 0.3494(3) 0.088(3) Uani 1 1 d . . . 
H30C H -0.0389 0.0867 0.3255 0.105 Uiso 1 1 calc R . . 
H30D H -0.0955 0.1216 0.3460 0.105 Uiso 1 1 calc R . . 
C31C C 0.0075(5) 0.1455(2) 0.3279(4) 0.088(3) Uani 1 1 d . . . 
H31C H -0.0088 0.1733 0.3397 0.105 Uiso 1 1 calc R . . 
H31D H 0.0014 0.1444 0.2820 0.105 Uiso 1 1 calc R . . 
C32C C 0.0907(5) 0.1361(2) 0.3601(3) 0.080(3) Uani 1 1 d . . . 
H32C H 0.1151 0.1160 0.3357 0.096 Uiso 1 1 calc R . . 
H32D H 0.1231 0.1617 0.3661 0.096 Uiso 1 1 calc R . . 
C33C C 0.3794(5) 0.0926(2) 0.6135(4) 0.087(2) Uani 1 1 d . . . 
H33C H 0.3542 0.0654 0.6169 0.104 Uiso 1 1 calc R . . 
H33D H 0.4105 0.0910 0.5806 0.104 Uiso 1 1 calc R . . 
C34C C 0.4275(7) 0.1040(3) 0.6700(5) 0.128(4) Uiso 1 1 d . . . 
H34C H 0.4831 0.0960 0.6705 0.153 Uiso 1 1 calc R . . 
H34D H 0.4105 0.0890 0.7042 0.153 Uiso 1 1 calc R . . 
C35C C 0.4232(5) 0.1482(3) 0.6799(4) 0.109(4) Uani 1 1 d . . . 
H35C H 0.4721 0.1623 0.6742 0.131 Uiso 1 1 calc R . . 
H35D H 0.4149 0.1544 0.7222 0.131 Uiso 1 1 calc R . . 
C36C C 0.3539(5) 0.1609(2) 0.6315(4) 0.087(2) Uani 1 1 d . . . 
H36C H 0.3143 0.1750 0.6509 0.104 Uiso 1 1 calc R . . 
H36D H 0.3706 0.1804 0.6019 0.104 Uiso 1 1 calc R . . 
 
loop_ 
 _atom_site_aniso_label 
 _atom_site_aniso_U_11 
 _atom_site_aniso_U_22 
 _atom_site_aniso_U_33 
 _atom_site_aniso_U_23 
 _atom_site_aniso_U_13 
 _atom_site_aniso_U_12 
Sr1A 0.0224(4) 0.0295(3) 0.0196(3) -0.0001(2) 0.0052(2) 0.0010(2) 
Se1A 0.0361(5) 0.0263(3) 0.0284(3) 0.0000(2) 0.0121(3) -0.0011(3) 
Se2A 0.0466(5) 0.0282(3) 0.0338(3) 0.0046(3) 0.0219(3) -0.0003(3) 
Se3A 0.0377(5) 0.0341(3) 0.0327(3) 0.0101(3) 0.0167(3) 0.0131(3) 
Se4A 0.0292(4) 0.0276(3) 0.0286(3) 0.0004(2) 0.0128(3) 0.0046(3) 
P1A 0.0302(12) 0.0269(8) 0.0235(7) 0.0042(6) 0.0104(7) 0.0016(7) 
P2A 0.0250(11) 0.0248(7) 0.0219(7) 0.0010(6) 0.0085(7) 0.0027(7) 
O1A 0.058(4) 0.034(2) 0.036(2) 0.0128(19) 0.017(2) 0.011(2) 
O2A 0.017(3) 0.097(3) 0.031(2) -0.021(2) 0.003(2) 0.000(2) 
O3A 0.034(3) 0.042(2) 0.027(2) -0.0046(18) 0.004(2) -0.003(2) 
C1A 0.023(4) 0.022(3) 0.031(3) 0.001(2) 0.004(3) 0.002(3) 
C2A 0.025(5) 0.067(4) 0.033(3) 0.024(3) 0.005(3) 0.010(3) 
C3A 0.023(5) 0.083(5) 0.046(4) 0.015(4) 0.020(4) 0.012(4) 
C4A 0.018(4) 0.050(4) 0.051(4) 0.013(3) 0.008(3) 0.014(3) 
C5A 0.032(6) 0.102(6) 0.045(4) 0.033(4) 0.003(4) 0.014(4) 
C6A 0.036(6) 0.095(5) 0.040(4) 0.025(4) 0.016(4) 0.015(4) 
C7A 0.020(4) 0.027(3) 0.027(3) 0.004(2) 0.011(3) 0.001(3) 
C8A 0.038(5) 0.035(3) 0.041(4) -0.005(3) 0.017(3) -0.009(3) 
C9A 0.060(6) 0.031(3) 0.044(4) -0.014(3) 0.010(4) -0.008(3) 
C10A 0.045(5) 0.053(4) 0.027(3) -0.004(3) -0.001(3) -0.010(3) 
C11A 0.051(5) 0.037(3) 0.033(3) 0.004(3) -0.001(3) -0.002(3) 
C12A 0.038(5) 0.027(3) 0.033(3) -0.003(3) 0.002(3) -0.012(3) 
C13A 0.020(4) 0.031(3) 0.019(3) 0.001(2) 0.000(3) -0.003(3) 
C14A 0.032(5) 0.055(4) 0.030(3) -0.013(3) 0.010(3) -0.010(3) 
C15A 0.031(5) 0.078(5) 0.031(3) -0.001(3) 0.018(3) -0.008(4) 
C16A 0.027(5) 0.060(4) 0.042(4) 0.012(3) 0.004(4) -0.013(4) 
C17A 0.049(6) 0.029(3) 0.056(4) -0.002(3) 0.008(4) -0.009(3) 
C18A 0.033(5) 0.030(3) 0.046(4) 0.000(3) 0.016(3) -0.006(3) 
C19A 0.020(4) 0.025(3) 0.021(3) -0.003(2) 0.009(3) -0.001(2) 
C20A 0.038(5) 0.032(3) 0.033(3) 0.000(3) 0.017(3) -0.004(3) 
C21A 0.054(5) 0.031(3) 0.038(4) -0.008(3) 0.015(3) -0.012(3) 
C22A 0.027(5) 0.059(4) 0.027(3) -0.013(3) 0.005(3) -0.010(3) 
C23A 0.040(5) 0.048(4) 0.028(3) 0.007(3) 0.002(3) 0.004(3) 
C24A 0.040(5) 0.027(3) 0.029(3) -0.005(3) 0.002(3) 0.004(3) 
C25A 0.079(7) 0.044(4) 0.063(5) 0.017(3) 0.022(5) 0.018(4) 
C26A 0.122(6) 0.063(4) 0.073(4) 0.008(3) 0.001(4) 0.045(4) 
C27A 0.122(6) 0.063(4) 0.073(4) 0.008(3) 0.001(4) 0.045(4) 
C28A 0.086(7) 0.039(4) 0.061(5) 0.002(3) 0.034(5) 0.001(4) 
C29A 0.030(4) 0.173(6) 0.061(4) -0.023(4) 0.017(3) 0.022(4) 
C32A 0.030(4) 0.173(6) 0.061(4) -0.023(4) 0.017(3) 0.022(4) 
C33A 0.041(5) 0.063(4) 0.034(4) -0.017(3) 0.015(3) -0.015(4) 
C34A 0.048(6) 0.099(6) 0.035(4) 0.013(4) -0.001(4) -0.013(5) 
C35A 0.051(6) 0.052(4) 0.042(4) 0.007(3) -0.005(4) -0.002(4) 
C36A 0.035(5) 0.055(4) 0.039(4) 0.008(3) 0.000(4) 0.001(4) 
Sr1B 0.0260(4) 0.0276(3) 0.0226(3) 0.0001(2) 0.0067(3) 0.0040(2) 
Se1B 0.0347(5) 0.0229(3) 0.0365(3) -0.0037(2) 0.0121(3) -0.0005(3) 
Se2B 0.0389(5) 0.0256(3) 0.0390(3) -0.0046(3) 0.0203(3) -0.0059(3) 
Se3B 0.0353(5) 0.0289(3) 0.0316(3) 0.0050(2) 0.0121(3) 0.0084(3) 
Se4B 0.0377(5) 0.0272(3) 0.0261(3) -0.0015(2) 0.0111(3) 0.0054(3) 
P1B 0.0279(11) 0.0236(7) 0.0257(8) -0.0027(6) 0.0077(7) -0.0021(7) 
P2B 0.0259(11) 0.0238(7) 0.0231(7) 0.0000(6) 0.0067(7) -0.0001(7) 
O1B 0.045(3) 0.040(2) 0.036(2) 0.0101(19) 0.013(2) 0.016(2) 
O2B 0.041(3) 0.044(2) 0.034(2) -0.0128(19) -0.002(2) 0.013(2) 
O3B 0.025(3) 0.084(3) 0.038(2) -0.018(2) 0.005(2) -0.003(2) 
C1B 0.026(4) 0.019(3) 0.027(3) -0.004(2) 0.003(3) 0.001(3) 
C2B 0.031(5) 0.051(4) 0.029(3) 0.003(3) 0.001(3) -0.001(3) 
C3B 0.054(6) 0.067(4) 0.027(3) -0.004(3) 0.023(4) 0.004(4) 
C4B 0.053(6) 0.062(4) 0.028(4) -0.006(3) 0.005(4) 0.004(4) 
C5B 0.050(6) 0.053(4) 0.036(4) 0.000(3) -0.012(4) -0.001(4) 
C6B 0.033(5) 0.046(4) 0.033(3) 0.000(3) 0.008(3) -0.008(3) 
C7B 0.029(4) 0.025(3) 0.029(3) 0.003(2) 0.010(3) 0.003(3) 
C8B 0.025(5) 0.032(3) 0.051(4) -0.003(3) 0.002(3) -0.005(3) 
C9B 0.052(6) 0.038(4) 0.057(4) 0.000(3) 0.015(4) 0.020(4) 
C10B 0.035(5) 0.044(4) 0.041(4) 0.011(3) 0.007(3) 0.011(3) 
C11B 0.025(5) 0.043(4) 0.046(4) -0.001(3) -0.001(3) -0.005(3) 
C12B 0.036(5) 0.024(3) 0.041(4) 0.002(3) 0.000(3) -0.008(3) 
C13B 0.024(4) 0.026(3) 0.021(3) 0.003(2) 0.005(3) -0.011(3) 
C14B 0.026(4) 0.041(3) 0.032(3) 0.002(3) 0.010(3) 0.001(3) 
C15B 0.057(6) 0.044(4) 0.029(3) -0.012(3) 0.010(3) -0.008(4) 
C16B 0.050(5) 0.042(4) 0.019(3) -0.002(3) -0.003(3) -0.023(3) 
C17B 0.040(5) 0.037(3) 0.040(4) 0.018(3) -0.007(3) -0.006(3) 
C18B 0.038(5) 0.025(3) 0.027(3) 0.003(2) 0.006(3) -0.005(3) 
C19B 0.024(4) 0.019(3) 0.031(3) 0.002(2) 0.006(3) -0.001(2) 
C20B 0.017(4) 0.033(3) 0.038(3) -0.001(3) 0.003(3) 0.001(3) 
C21B 0.032(5) 0.034(3) 0.052(4) -0.007(3) 0.005(4) -0.008(3) 
C22B 0.031(5) 0.027(3) 0.068(5) 0.011(3) 0.016(4) 0.000(3) 
C23B 0.041(5) 0.059(4) 0.043(4) 0.007(3) 0.018(4) -0.013(4) 
C24B 0.033(5) 0.044(4) 0.033(3) -0.004(3) 0.015(3) -0.009(3) 
C25B 0.122(6) 0.065(3) 0.052(3) 0.021(3) 0.036(3) 0.047(4) 
C26B 0.122(6) 0.065(3) 0.052(3) 0.021(3) 0.036(3) 0.047(4) 
C27B 0.089(7) 0.042(4) 0.050(4) 0.004(3) -0.001(4) 0.031(4) 
C28B 0.084(7) 0.038(4) 0.052(4) 0.012(3) 0.038(4) 0.028(4) 
C29B 0.053(5) 0.034(3) 0.040(4) -0.011(3) 0.024(4) -0.008(3) 
C30B 0.066(7) 0.086(5) 0.032(4) -0.013(4) -0.002(4) -0.042(5) 
C31B 0.056(7) 0.157(9) 0.057(5) -0.005(5) -0.020(5) 0.028(6) 
C32B 0.041(6) 0.060(4) 0.071(5) -0.004(4) -0.010(4) 0.009(4) 
C33B 0.048(6) 0.096(6) 0.055(5) -0.010(4) 0.022(4) 0.000(5) 
C34B 0.035(6) 0.159(8) 0.075(6) -0.041(6) -0.001(5) -0.007(6) 
Sr1C 0.0275(4) 0.0262(3) 0.0255(3) 0.0002(2) 0.0071(3) 0.0022(2) 
Se1C 0.0374(5) 0.0276(3) 0.0341(3) -0.0045(3) 0.0129(3) -0.0044(3) 
Se2C 0.0344(5) 0.0271(3) 0.0390(3) -0.0043(3) 0.0168(3) -0.0048(3) 
Se3C 0.0383(5) 0.0272(3) 0.0307(3) 0.0031(2) 0.0123(3) 0.0044(3) 
Se4C 0.0630(6) 0.0284(3) 0.0379(3) -0.0038(3) 0.0241(4) 0.0028(3) 
P1C 0.0252(11) 0.0249(8) 0.0273(8) -0.0015(6) 0.0072(7) -0.0003(7) 
P2C 0.0340(12) 0.0226(7) 0.0297(8) -0.0004(6) 0.0122(8) -0.0012(7) 
O1C 0.032(3) 0.031(2) 0.069(3) 0.005(2) 0.022(2) 0.000(2) 
O2C 0.027(3) 0.070(3) 0.037(2) 0.002(2) 0.003(2) 0.012(2) 
O3C 0.034(3) 0.060(3) 0.038(2) -0.013(2) -0.003(2) 0.012(2) 
C1C 0.020(4) 0.028(3) 0.028(3) -0.005(2) 0.007(3) 0.003(3) 
C2C 0.036(5) 0.038(3) 0.037(4) -0.007(3) 0.002(3) -0.001(3) 
C3C 0.043(6) 0.057(4) 0.042(4) -0.015(3) 0.001(4) -0.003(4) 
C4C 0.063(6) 0.047(4) 0.026(3) -0.002(3) 0.006(4) 0.014(4) 
C5C 0.049(6) 0.054(4) 0.038(4) -0.001(3) 0.020(4) -0.002(4) 
C6C 0.038(5) 0.041(4) 0.038(4) 0.001(3) 0.014(3) -0.002(3) 
C7C 0.022(4) 0.046(4) 0.032(3) 0.002(3) 0.009(3) -0.002(3) 
C8C 0.032(5) 0.066(4) 0.046(4) 0.006(3) 0.001(4) 0.016(4) 
C9C 0.039(6) 0.096(6) 0.050(4) 0.014(4) -0.003(4) -0.003(5) 
C10C 0.041(6) 0.077(6) 0.094(6) 0.040(5) 0.012(5) 0.013(5) 
C11C 0.051(7) 0.038(4) 0.154(9) 0.019(5) 0.026(6) 0.015(4) 
C12C 0.057(7) 0.036(4) 0.097(6) -0.005(4) 0.018(5) 0.008(4) 
C13C 0.025(4) 0.026(3) 0.033(3) 0.003(3) 0.004(3) 0.002(3) 
C14C 0.053(6) 0.040(4) 0.046(4) -0.003(3) 0.018(4) -0.011(3) 
C15C 0.056(6) 0.060(4) 0.055(4) 0.012(4) 0.032(4) -0.010(4) 
C16C 0.036(5) 0.028(4) 0.100(6) -0.004(4) 0.021(5) -0.007(3) 
C17C 0.028(5) 0.031(4) 0.088(6) -0.018(4) 0.000(4) -0.006(3) 
C18C 0.029(5) 0.032(3) 0.052(4) -0.014(3) -0.005(4) -0.005(3) 
C19C 0.021(4) 0.030(3) 0.030(3) 0.002(3) 0.009(3) -0.002(3) 
C20C 0.041(5) 0.026(3) 0.037(3) 0.002(3) -0.005(3) 0.000(3) 
C21C 0.044(5) 0.041(4) 0.041(4) 0.001(3) 0.008(4) -0.008(3) 
C22C 0.046(5) 0.044(4) 0.042(4) 0.009(3) -0.007(4) -0.015(4) 
C23C 0.038(5) 0.039(4) 0.045(4) 0.016(3) -0.002(3) 0.014(3) 
C24C 0.042(5) 0.027(3) 0.040(4) 0.001(3) 0.011(3) 0.006(3) 
C25C 0.042(5) 0.041(4) 0.064(4) -0.006(3) 0.017(4) -0.005(4) 
C26C 0.048(6) 0.038(4) 0.087(5) 0.017(4) 0.015(5) -0.003(4) 
C27C 0.053(6) 0.040(4) 0.055(4) 0.010(3) -0.001(4) 0.011(4) 
C28C 0.049(6) 0.040(4) 0.163(8) 0.018(5) 0.051(6) 0.014(4) 
C29C 0.027(5) 0.056(4) 0.069(5) -0.015(4) 0.018(4) 0.003(3) 
C30C 0.088(7) 0.097(5) 0.061(4) -0.033(4) -0.023(4) 0.041(4) 
C31C 0.088(7) 0.097(5) 0.061(4) -0.033(4) -0.023(4) 0.041(4) 
C32C 0.067(7) 0.123(7) 0.056(5) 0.024(5) 0.027(5) 0.042(5) 
C33C 0.082(6) 0.075(4) 0.088(4) -0.021(3) -0.015(4) 0.028(4) 
C35C 0.045(7) 0.180(10) 0.085(6) -0.055(6) -0.025(5) 0.003(6) 
C36C 0.082(6) 0.075(4) 0.088(4) -0.021(3) -0.015(4) 0.028(4) 
 
_geom_special_details 
; 
 All esds (except the esd in the dihedral angle between two l.s. planes) 
 are estimated using the full covariance matrix.  The cell esds are taken 
 into account individually in the estimation of esds in distances, angles 
 and torsion angles; correlations between esds in cell parameters are only 
 used when they are defined by crystal symmetry.  An approximate (isotropic) 
 treatment of cell esds is used for estimating esds involving l.s. planes. 
; 
 
loop_ 
 _geom_bond_atom_site_label_1 
 _geom_bond_atom_site_label_2 
 _geom_bond_distance 
 _geom_bond_site_symmetry_2 
 _geom_bond_publ_flag 
Sr1A O3A 2.515(4) . ? 
Sr1A O2A 2.541(4) . ? 
Sr1A O1A 2.581(3) . ? 
Sr1A Se2A 3.1594(7) . ? 
Sr1A Se3A 3.1617(8) . ? 
Sr1A Se4A 3.1803(7) . ? 
Sr1A Se1A 3.1809(8) . ? 
Sr1A P1A 3.7275(16) . ? 
Se1A P1A 2.1547(14) . ? 
Se2A P1A 2.1561(15) . ? 
Se3A P2A 2.1550(14) . ? 
Se4A P2A 2.1455(16) . ? 
P1A C1A 1.816(6) . ? 
P1A C7A 1.830(5) . ? 
P2A C13A 1.802(6) . ? 
P2A C19A 1.830(5) . ? 
O1A C25A 1.429(6) . ? 
O1A C28A 1.439(6) . ? 
O2A C29A 1.408(8) . ? 
O2A C32A 1.444(7) . ? 
O3A C33A 1.434(6) . ? 
O3A C36A 1.448(7) . ? 
C1A C6A 1.371(7) . ? 
C1A C2A 1.380(8) . ? 
C2A C3A 1.375(8) . ? 
C2A H2AA 0.9500 . ? 
C3A C4A 1.357(7) . ? 
C3A H3AA 0.9500 . ? 
C4A C5A 1.359(8) . ? 
C4A H4AA 0.9500 . ? 
C5A C6A 1.392(9) . ? 
C5A H5AA 0.9500 . ? 
C6A H6AA 0.9500 . ? 
C7A C8A 1.384(7) . ? 
C7A C12A 1.395(6) . ? 
C8A C9A 1.378(7) . ? 
C8A H8AA 0.9500 . ? 
C9A C10A 1.376(7) . ? 
C9A H9AA 0.9500 . ? 
C10A C11A 1.384(7) . ? 
C10A H10A 0.9500 . ? 
C11A C12A 1.378(7) . ? 
C11A H11A 0.9500 . ? 
C12A H12A 0.9500 . ? 
C13A C14A 1.387(8) . ? 
C13A C18A 1.397(7) . ? 
C14A C15A 1.383(8) . ? 
C14A H14A 0.9500 . ? 
C15A C16A 1.373(8) . ? 
C15A H15A 0.9500 . ? 
C16A C17A 1.370(9) . ? 
C16A H16A 0.9500 . ? 
C17A C18A 1.379(8) . ? 
C17A H17A 0.9500 . ? 
C18A H18A 0.9500 . ? 
C19A C20A 1.380(6) . ? 
C19A C24A 1.386(6) . ? 
C20A C21A 1.391(7) . ? 
C20A H20A 0.9500 . ? 
C21A C22A 1.365(7) . ? 
C21A H21A 0.9500 . ? 
C22A C23A 1.390(7) . ? 
C22A H22A 0.9500 . ? 
C23A C24A 1.377(7) . ? 
C23A H23A 0.9500 . ? 
C24A H24A 0.9500 . ? 
C25A C26A 1.458(8) . ? 
C25A H25A 0.9900 . ? 
C25A H25B 0.9900 . ? 
C26A C27A 1.393(9) . ? 
C26A H26A 0.9900 . ? 
C26A H26B 0.9900 . ? 
C27A C28A 1.455(8) . ? 
C27A H27A 0.9900 . ? 
C27A H27B 0.9900 . ? 
C28A H28A 0.9900 . ? 
C28A H28B 0.9900 . ? 
C29A C30A 1.486(9) . ? 
C29A H29A 0.9900 . ? 
C29A H29B 0.9900 . ? 
C30A C31A 1.391(12) . ? 
C30A H30A 0.9900 . ? 
C30A H30B 0.9900 . ? 
C31A C32A 1.406(10) . ? 
C31A H31A 0.9900 . ? 
C31A H31B 0.9900 . ? 
C32A H32A 0.9900 . ? 
C32A H32B 0.9900 . ? 
C33A C34A 1.518(8) . ? 
C33A H33A 0.9900 . ? 
C33A H33B 0.9900 . ? 
C34A C35A 1.496(9) . ? 
C34A H34A 0.9900 . ? 
C34A H34B 0.9900 . ? 
C35A C36A 1.526(7) . ? 
C35A H35A 0.9900 . ? 
C35A H35B 0.9900 . ? 
C36A H36A 0.9900 . ? 
C36A H36B 0.9900 . ? 
Sr1B O2B 2.532(4) . ? 
Sr1B O1B 2.551(3) . ? 
Sr1B O3B 2.568(4) . ? 
Sr1B Se4B 3.1381(7) . ? 
Sr1B Se2B 3.1785(8) . ? 
Sr1B Se1B 3.1934(9) . ? 
Sr1B Se3B 3.2563(8) . ? 
Sr1B P2B 3.7474(15) . ? 
Se1B P1B 2.1479(14) . ? 
Se2B P1B 2.1478(16) . ? 
Se3B P2B 2.1609(14) . ? 
Se4B P2B 2.1517(16) . ? 
P1B C7B 1.817(6) . ? 
P1B C1B 1.824(5) . ? 
P2B C19B 1.825(6) . ? 
P2B C13B 1.829(5) . ? 
O1B C28B 1.429(6) . ? 
O1B C25B 1.430(6) . ? 
O2B C32B 1.426(7) . ? 
O2B C29B 1.428(6) . ? 
O3B C36B 1.395(11) . ? 
O3B C33B 1.433(7) . ? 
C1B C2B 1.373(8) . ? 
C1B C6B 1.376(7) . ? 
C2B C3B 1.401(7) . ? 
C2B H2BA 0.9500 . ? 
C3B C4B 1.378(8) . ? 
C3B H3BA 0.9500 . ? 
C4B C5B 1.355(9) . ? 
C4B H4BA 0.9500 . ? 
C5B C6B 1.394(7) . ? 
C5B H5BA 0.9500 . ? 
C6B H6BA 0.9500 . ? 
C7B C12B 1.375(7) . ? 
C7B C8B 1.389(7) . ? 
C8B C9B 1.376(8) . ? 
C8B H8BA 0.9500 . ? 
C9B C10B 1.378(8) . ? 
C9B H9BA 0.9500 . ? 
C10B C11B 1.363(7) . ? 
C10B H10C 0.9500 . ? 
C11B C12B 1.384(8) . ? 
C11B H11C 0.9500 . ? 
C12B H12C 0.9500 . ? 
C13B C18B 1.383(7) . ? 
C13B C14B 1.386(7) . ? 
C14B C15B 1.381(7) . ? 
C14B H14C 0.9500 . ? 
C15B C16B 1.378(8) . ? 
C15B H15C 0.9500 . ? 
C16B C17B 1.373(7) . ? 
C16B H16C 0.9500 . ? 
C17B C18B 1.391(7) . ? 
C17B H17C 0.9500 . ? 
C18B H18C 0.9500 . ? 
C19B C24B 1.380(7) . ? 
C19B C20B 1.395(7) . ? 
C20B C21B 1.379(8) . ? 
C20B H20C 0.9500 . ? 
C21B C22B 1.351(8) . ? 
C21B H21C 0.9500 . ? 
C22B C23B 1.392(8) . ? 
C22B H22C 0.9500 . ? 
C23B C24B 1.389(8) . ? 
C23B H23C 0.9500 . ? 
C24B H24C 0.9500 . ? 
C25B C26B 1.438(8) . ? 
C25B H25E 0.9900 . ? 
C25B H25F 0.9900 . ? 
C26B C27B 1.421(8) . ? 
C26B H26E 0.9900 . ? 
C26B H26F 0.9900 . ? 
C27B C28B 1.474(7) . ? 
C27B H27E 0.9900 . ? 
C27B H27F 0.9900 . ? 
C28B H28E 0.9900 . ? 
C28B H28F 0.9900 . ? 
C29B C30B 1.493(8) . ? 
C29B H29E 0.9900 . ? 
C29B H29F 0.9900 . ? 
C30B C31B 1.462(10) . ? 
C30B H30E 0.9900 . ? 
C30B H30F 0.9900 . ? 
C31B C32B 1.459(8) . ? 
C31B H31E 0.9900 . ? 
C31B H31F 0.9900 . ? 
C32B H32E 0.9900 . ? 
C32B H32F 0.9900 . ? 
C33B C34B 1.497(9) . ? 
C33B H33E 0.9900 . ? 
C33B H33F 0.9900 . ? 
C34B C35B 1.409(11) . ? 
C34B H34E 0.9900 . ? 
C34B H34F 0.9900 . ? 
C35B C36B 1.428(11) . ? 
C35B H35E 0.9900 . ? 
C35B H35F 0.9900 . ? 
C36B H36E 0.9900 . ? 
C36B H36F 0.9900 . ? 
Sr1C O3C 2.513(4) . ? 
Sr1C O2C 2.537(4) . ? 
Sr1C O1C 2.566(4) . ? 
Sr1C Se4C 3.1626(7) . ? 
Sr1C Se2C 3.1684(7) . ? 
Sr1C Se1C 3.1960(9) . ? 
Sr1C Se3C 3.2201(8) . ? 
Sr1C P2C 3.6917(16) . ? 
Se1C P1C 2.1508(14) . ? 
Se2C P1C 2.1468(16) . ? 
Se3C P2C 2.1629(14) . ? 
Se4C P2C 2.1522(16) . ? 
P1C C7C 1.813(6) . ? 
P1C C1C 1.837(5) . ? 
P2C C13C 1.825(6) . ? 
P2C C19C 1.824(5) . ? 
O1C C25C 1.414(6) . ? 
O1C C28C 1.429(7) . ? 
O2C C29C 1.437(7) . ? 
O2C C32C 1.445(7) . ? 
O3C C36C 1.406(7) . ? 
O3C C33C 1.436(7) . ? 
C1C C6C 1.367(8) . ? 
C1C C2C 1.387(7) . ? 
C2C C3C 1.408(8) . ? 
C2C H2CA 0.9500 . ? 
C3C C4C 1.379(9) . ? 
C3C H3CA 0.9500 . ? 
C4C C5C 1.366(8) . ? 
C4C H4CA 0.9500 . ? 
C5C C6C 1.389(7) . ? 
C5C H5CA 0.9500 . ? 
C6C H6CA 0.9500 . ? 
C7C C12C 1.373(8) . ? 
C7C C8C 1.389(8) . ? 
C8C C9C 1.392(9) . ? 
C8C H8CA 0.9500 . ? 
C9C C10C 1.346(9) . ? 
C9C H9CA 0.9500 . ? 
C10C C11C 1.379(9) . ? 
C10C H10B 0.9500 . ? 
C11C C12C 1.384(9) . ? 
C11C H11B 0.9500 . ? 
C12C H12B 0.9500 . ? 
C13C C18C 1.378(7) . ? 
C13C C14C 1.391(7) . ? 
C14C C15C 1.386(8) . ? 
C14C H14B 0.9500 . ? 
C15C C16C 1.377(8) . ? 
C15C H15B 0.9500 . ? 
C16C C17C 1.363(9) . ? 
C16C H16B 0.9500 . ? 
C17C C18C 1.395(9) . ? 
C17C H17B 0.9500 . ? 
C18C H18B 0.9500 . ? 
C19C C20C 1.370(7) . ? 
C19C C24C 1.382(7) . ? 
C20C C21C 1.386(7) . ? 
C20C H20B 0.9500 . ? 
C21C C22C 1.372(8) . ? 
C21C H21B 0.9500 . ? 
C22C C23C 1.383(7) . ? 
C22C H22B 0.9500 . ? 
C23C C24C 1.382(7) . ? 
C23C H23B 0.9500 . ? 
C24C H24B 0.9500 . ? 
C25C C26C 1.493(8) . ? 
C25C H25C 0.9900 . ? 
C25C H25D 0.9900 . ? 
C26C C27C 1.474(9) . ? 
C26C H26C 0.9900 . ? 
C26C H26D 0.9900 . ? 
C27C C28C 1.463(7) . ? 
C27C H27C 0.9900 . ? 
C27C H27D 0.9900 . ? 
C28C H28C 0.9900 . ? 
C28C H28D 0.9900 . ? 
C29C C30C 1.539(8) . ? 
C29C H29C 0.9900 . ? 
C29C H29D 0.9900 . ? 
C30C C31C 1.472(11) . ? 
C30C H30C 0.9900 . ? 
C30C H30D 0.9900 . ? 
C31C C32C 1.487(10) . ? 
C31C H31C 0.9900 . ? 
C31C H31D 0.9900 . ? 
C32C H32C 0.9900 . ? 
C32C H32D 0.9900 . ? 
C33C C34C 1.384(10) . ? 
C33C H33C 0.9900 . ? 
C33C H33D 0.9900 . ? 
C34C C35C 1.445(10) . ? 
C34C H34C 0.9900 . ? 
C34C H34D 0.9900 . ? 
C35C C36C 1.475(9) . ? 
C35C H35C 0.9900 . ? 
C35C H35D 0.9900 . ? 
C36C H36C 0.9900 . ? 
C36C H36D 0.9900 . ? 
 
loop_ 
 _geom_angle_atom_site_label_1 
 _geom_angle_atom_site_label_2 
 _geom_angle_atom_site_label_3 
 _geom_angle 
 _geom_angle_site_symmetry_1 
 _geom_angle_site_symmetry_3 
 _geom_angle_publ_flag 
O3A Sr1A O2A 169.56(13) . . ? 
O3A Sr1A O1A 90.10(12) . . ? 
O2A Sr1A O1A 79.77(13) . . ? 
O3A Sr1A Se2A 102.74(9) . . ? 
O2A Sr1A Se2A 84.26(10) . . ? 
O1A Sr1A Se2A 143.28(9) . . ? 
O3A Sr1A Se3A 94.89(9) . . ? 
O2A Sr1A Se3A 85.21(10) . . ? 
O1A Sr1A Se3A 76.28(9) . . ? 
Se2A Sr1A Se3A 135.12(2) . . ? 
O3A Sr1A Se4A 85.10(8) . . ? 
O2A Sr1A Se4A 104.63(10) . . ? 
O1A Sr1A Se4A 144.84(9) . . ? 
Se2A Sr1A Se4A 71.311(17) . . ? 
Se3A Sr1A Se4A 69.497(18) . . ? 
O3A Sr1A Se1A 76.85(9) . . ? 
O2A Sr1A Se1A 98.74(10) . . ? 
O1A Sr1A Se1A 80.22(10) . . ? 
Se2A Sr1A Se1A 69.784(18) . . ? 
Se3A Sr1A Se1A 155.08(2) . . ? 
Se4A Sr1A Se1A 131.76(2) . . ? 
O3A Sr1A P1A 94.73(10) . . ? 
O2A Sr1A P1A 86.54(10) . . ? 
O1A Sr1A P1A 110.42(9) . . ? 
Se2A Sr1A P1A 35.28(2) . . ? 
Se3A Sr1A P1A 168.26(3) . . ? 
Se4A Sr1A P1A 104.68(3) . . ? 
Se1A Sr1A P1A 35.23(2) . . ? 
P1A Se1A Sr1A 86.37(5) . . ? 
P1A Se2A Sr1A 86.90(4) . . ? 
P2A Se3A Sr1A 87.82(5) . . ? 
P2A Se4A Sr1A 87.50(4) . . ? 
C1A P1A C7A 104.5(3) . . ? 
C1A P1A Se1A 109.09(17) . . ? 
C7A P1A Se1A 109.73(16) . . ? 
C1A P1A Se2A 109.25(18) . . ? 
C7A P1A Se2A 109.26(18) . . ? 
Se1A P1A Se2A 114.57(7) . . ? 
C1A P1A Sr1A 139.57(17) . . ? 
C7A P1A Sr1A 115.97(19) . . ? 
Se1A P1A Sr1A 58.39(4) . . ? 
Se2A P1A Sr1A 57.82(4) . . ? 
C13A P2A C19A 104.5(2) . . ? 
C13A P2A Se4A 111.18(19) . . ? 
C19A P2A Se4A 108.41(19) . . ? 
C13A P2A Se3A 108.12(18) . . ? 
C19A P2A Se3A 109.76(16) . . ? 
Se4A P2A Se3A 114.40(7) . . ? 
C25A O1A C28A 108.0(4) . . ? 
C25A O1A Sr1A 121.4(3) . . ? 
C28A O1A Sr1A 130.1(3) . . ? 
C29A O2A C32A 108.0(5) . . ? 
C29A O2A Sr1A 129.5(4) . . ? 
C32A O2A Sr1A 122.2(4) . . ? 
C33A O3A C36A 108.0(4) . . ? 
C33A O3A Sr1A 129.7(4) . . ? 
C36A O3A Sr1A 119.2(3) . . ? 
C6A C1A C2A 117.6(6) . . ? 
C6A C1A P1A 119.9(5) . . ? 
C2A C1A P1A 122.5(4) . . ? 
C3A C2A C1A 121.3(5) . . ? 
C3A C2A H2AA 119.4 . . ? 
C1A C2A H2AA 119.4 . . ? 
C4A C3A C2A 120.8(6) . . ? 
C4A C3A H3AA 119.6 . . ? 
C2A C3A H3AA 119.6 . . ? 
C3A C4A C5A 118.9(6) . . ? 
C3A C4A H4AA 120.6 . . ? 
C5A C4A H4AA 120.6 . . ? 
C4A C5A C6A 120.8(6) . . ? 
C4A C5A H5AA 119.6 . . ? 
C6A C5A H5AA 119.6 . . ? 
C1A C6A C5A 120.6(6) . . ? 
C1A C6A H6AA 119.7 . . ? 
C5A C6A H6AA 119.7 . . ? 
C8A C7A C12A 119.1(5) . . ? 
C8A C7A P1A 119.6(4) . . ? 
C12A C7A P1A 121.1(4) . . ? 
C9A C8A C7A 120.6(5) . . ? 
C9A C8A H8AA 119.7 . . ? 
C7A C8A H8AA 119.7 . . ? 
C10A C9A C8A 120.1(5) . . ? 
C10A C9A H9AA 120.0 . . ? 
C8A C9A H9AA 120.0 . . ? 
C9A C10A C11A 120.0(5) . . ? 
C9A C10A H10A 120.0 . . ? 
C11A C10A H10A 120.0 . . ? 
C12A C11A C10A 120.2(5) . . ? 
C12A C11A H11A 119.9 . . ? 
C10A C11A H11A 119.9 . . ? 
C11A C12A C7A 120.1(5) . . ? 
C11A C12A H12A 120.0 . . ? 
C7A C12A H12A 120.0 . . ? 
C14A C13A C18A 118.7(6) . . ? 
C14A C13A P2A 120.3(4) . . ? 
C18A C13A P2A 120.9(5) . . ? 
C15A C14A C13A 120.5(6) . . ? 
C15A C14A H14A 119.7 . . ? 
C13A C14A H14A 119.7 . . ? 
C16A C15A C14A 121.2(6) . . ? 
C16A C15A H15A 119.4 . . ? 
C14A C15A H15A 119.4 . . ? 
C17A C16A C15A 117.8(6) . . ? 
C17A C16A H16A 121.1 . . ? 
C15A C16A H16A 121.1 . . ? 
C16A C17A C18A 123.0(6) . . ? 
C16A C17A H17A 118.5 . . ? 
C18A C17A H17A 118.5 . . ? 
C17A C18A C13A 118.8(6) . . ? 
C17A C18A H18A 120.6 . . ? 
C13A C18A H18A 120.6 . . ? 
C20A C19A C24A 119.2(5) . . ? 
C20A C19A P2A 122.1(4) . . ? 
C24A C19A P2A 118.7(4) . . ? 
C19A C20A C21A 120.0(5) . . ? 
C19A C20A H20A 120.0 . . ? 
C21A C20A H20A 120.0 . . ? 
C22A C21A C20A 120.4(5) . . ? 
C22A C21A H21A 119.8 . . ? 
C20A C21A H21A 119.8 . . ? 
C21A C22A C23A 120.1(5) . . ? 
C21A C22A H22A 120.0 . . ? 
C23A C22A H22A 120.0 . . ? 
C24A C23A C22A 119.4(5) . . ? 
C24A C23A H23A 120.3 . . ? 
C22A C23A H23A 120.3 . . ? 
C23A C24A C19A 120.8(5) . . ? 
C23A C24A H24A 119.6 . . ? 
C19A C24A H24A 119.6 . . ? 
O1A C25A C26A 107.5(5) . . ? 
O1A C25A H25A 110.2 . . ? 
C26A C25A H25A 110.2 . . ? 
O1A C25A H25B 110.2 . . ? 
C26A C25A H25B 110.2 . . ? 
H25A C25A H25B 108.5 . . ? 
C27A C26A C25A 107.1(6) . . ? 
C27A C26A H26A 110.3 . . ? 
C25A C26A H26A 110.3 . . ? 
C27A C26A H26B 110.3 . . ? 
C25A C26A H26B 110.3 . . ? 
H26A C26A H26B 108.5 . . ? 
C26A C27A C28A 109.5(6) . . ? 
C26A C27A H27A 109.8 . . ? 
C28A C27A H27A 109.8 . . ? 
C26A C27A H27B 109.8 . . ? 
C28A C27A H27B 109.8 . . ? 
H27A C27A H27B 108.2 . . ? 
O1A C28A C27A 106.3(5) . . ? 
O1A C28A H28A 110.5 . . ? 
C27A C28A H28A 110.5 . . ? 
O1A C28A H28B 110.5 . . ? 
C27A C28A H28B 110.5 . . ? 
H28A C28A H28B 108.7 . . ? 
O2A C29A C30A 107.1(6) . . ? 
O2A C29A H29A 110.3 . . ? 
C30A C29A H29A 110.3 . . ? 
O2A C29A H29B 110.3 . . ? 
C30A C29A H29B 110.3 . . ? 
H29A C29A H29B 108.5 . . ? 
C31A C30A C29A 105.5(8) . . ? 
C31A C30A H30A 110.6 . . ? 
C29A C30A H30A 110.6 . . ? 
C31A C30A H30B 110.6 . . ? 
C29A C30A H30B 110.6 . . ? 
H30A C30A H30B 108.8 . . ? 
C30A C31A C32A 111.4(9) . . ? 
C30A C31A H31A 109.3 . . ? 
C32A C31A H31A 109.3 . . ? 
C30A C31A H31B 109.3 . . ? 
C32A C31A H31B 109.3 . . ? 
H31A C31A H31B 108.0 . . ? 
C31A C32A O2A 106.5(7) . . ? 
C31A C32A H32A 110.4 . . ? 
O2A C32A H32A 110.4 . . ? 
C31A C32A H32B 110.4 . . ? 
O2A C32A H32B 110.4 . . ? 
H32A C32A H32B 108.6 . . ? 
O3A C33A C34A 103.6(5) . . ? 
O3A C33A H33A 111.0 . . ? 
C34A C33A H33A 111.0 . . ? 
O3A C33A H33B 111.0 . . ? 
C34A C33A H33B 111.0 . . ? 
H33A C33A H33B 109.0 . . ? 
C35A C34A C33A 104.8(5) . . ? 
C35A C34A H34A 110.8 . . ? 
C33A C34A H34A 110.8 . . ? 
C35A C34A H34B 110.8 . . ? 
C33A C34A H34B 110.8 . . ? 
H34A C34A H34B 108.9 . . ? 
C34A C35A C36A 104.5(5) . . ? 
C34A C35A H35A 110.9 . . ? 
C36A C35A H35A 110.9 . . ? 
C34A C35A H35B 110.9 . . ? 
C36A C35A H35B 110.9 . . ? 
H35A C35A H35B 108.9 . . ? 
O3A C36A C35A 106.8(5) . . ? 
O3A C36A H36A 110.4 . . ? 
C35A C36A H36A 110.4 . . ? 
O3A C36A H36B 110.4 . . ? 
C35A C36A H36B 110.4 . . ? 
H36A C36A H36B 108.6 . . ? 
O2B Sr1B O1B 94.16(12) . . ? 
O2B Sr1B O3B 168.40(14) . . ? 
O1B Sr1B O3B 79.74(13) . . ? 
O2B Sr1B Se4B 85.01(9) . . ? 
O1B Sr1B Se4B 148.75(10) . . ? 
O3B Sr1B Se4B 95.08(10) . . ? 
O2B Sr1B Se2B 107.43(9) . . ? 
O1B Sr1B Se2B 135.24(9) . . ? 
O3B Sr1B Se2B 83.63(10) . . ? 
Se4B Sr1B Se2B 73.602(18) . . ? 
O2B Sr1B Se1B 77.90(10) . . ? 
O1B Sr1B Se1B 78.40(10) . . ? 
O3B Sr1B Se1B 110.13(10) . . ? 
Se4B Sr1B Se1B 131.32(2) . . ? 
Se2B Sr1B Se1B 68.929(18) . . ? 
O2B Sr1B Se3B 81.88(10) . . ? 
O1B Sr1B Se3B 79.87(9) . . ? 
O3B Sr1B Se3B 87.31(10) . . ? 
Se4B Sr1B Se3B 69.072(18) . . ? 
Se2B Sr1B Se3B 140.55(2) . . ? 
Se1B Sr1B Se3B 148.96(2) . . ? 
O2B Sr1B P2B 75.71(10) . . ? 
O1B Sr1B P2B 114.61(9) . . ? 
O3B Sr1B P2B 97.73(11) . . ? 
Se4B Sr1B P2B 35.02(2) . . ? 
Se2B Sr1B P2B 108.60(3) . . ? 
Se1B Sr1B P2B 151.24(3) . . ? 
Se3B Sr1B P2B 35.06(2) . . ? 
P1B Se1B Sr1B 88.24(5) . . ? 
P1B Se2B Sr1B 88.63(4) . . ? 
P2B Se3B Sr1B 84.99(5) . . ? 
P2B Se4B Sr1B 88.16(4) . . ? 
C7B P1B C1B 104.6(3) . . ? 
C7B P1B Se2B 108.84(17) . . ? 
C1B P1B Se2B 110.73(19) . . ? 
C7B P1B Se1B 110.98(17) . . ? 
C1B P1B Se1B 107.09(16) . . ? 
Se2B P1B Se1B 114.16(7) . . ? 
C19B P2B C13B 104.4(2) . . ? 
C19B P2B Se4B 109.72(17) . . ? 
C13B P2B Se4B 109.6(2) . . ? 
C19B P2B Se3B 108.69(18) . . ? 
C13B P2B Se3B 109.49(17) . . ? 
Se4B P2B Se3B 114.47(6) . . ? 
C19B P2B Sr1B 141.85(17) . . ? 
C13B P2B Sr1B 113.75(18) . . ? 
Se4B P2B Sr1B 56.82(4) . . ? 
Se3B P2B Sr1B 59.95(4) . . ? 
C28B O1B C25B 107.6(4) . . ? 
C28B O1B Sr1B 128.9(3) . . ? 
C25B O1B Sr1B 122.0(3) . . ? 
C32B O2B C29B 108.6(4) . . ? 
C32B O2B Sr1B 117.5(3) . . ? 
C29B O2B Sr1B 133.7(4) . . ? 
C36B O3B C33B 104.6(6) . . ? 
C36B O3B Sr1B 120.5(5) . . ? 
C33B O3B Sr1B 133.6(4) . . ? 
C2B C1B C6B 117.9(5) . . ? 
C2B C1B P1B 121.7(5) . . ? 
C6B C1B P1B 120.2(5) . . ? 
C1B C2B C3B 121.5(6) . . ? 
C1B C2B H2BA 119.3 . . ? 
C3B C2B H2BA 119.3 . . ? 
C4B C3B C2B 119.3(7) . . ? 
C4B C3B H3BA 120.4 . . ? 
C2B C3B H3BA 120.4 . . ? 
C5B C4B C3B 119.7(6) . . ? 
C5B C4B H4BA 120.2 . . ? 
C3B C4B H4BA 120.2 . . ? 
C4B C5B C6B 120.7(7) . . ? 
C4B C5B H5BA 119.6 . . ? 
C6B C5B H5BA 119.6 . . ? 
C1B C6B C5B 120.8(6) . . ? 
C1B C6B H6BA 119.6 . . ? 
C5B C6B H6BA 119.6 . . ? 
C12B C7B C8B 118.0(6) . . ? 
C12B C7B P1B 122.4(4) . . ? 
C8B C7B P1B 119.7(4) . . ? 
C9B C8B C7B 121.1(6) . . ? 
C9B C8B H8BA 119.5 . . ? 
C7B C8B H8BA 119.5 . . ? 
C8B C9B C10B 120.2(6) . . ? 
C8B C9B H9BA 119.9 . . ? 
C10B C9B H9BA 119.9 . . ? 
C11B C10B C9B 119.0(6) . . ? 
C11B C10B H10C 120.5 . . ? 
C9B C10B H10C 120.5 . . ? 
C10B C11B C12B 121.0(6) . . ? 
C10B C11B H11C 119.5 . . ? 
C12B C11B H11C 119.5 . . ? 
C7B C12B C11B 120.6(5) . . ? 
C7B C12B H12C 119.7 . . ? 
C11B C12B H12C 119.7 . . ? 
C18B C13B C14B 119.1(5) . . ? 
C18B C13B P2B 119.8(4) . . ? 
C14B C13B P2B 121.1(4) . . ? 
C15B C14B C13B 120.5(5) . . ? 
C15B C14B H14C 119.8 . . ? 
C13B C14B H14C 119.8 . . ? 
C16B C15B C14B 120.0(5) . . ? 
C16B C15B H15C 120.0 . . ? 
C14B C15B H15C 120.0 . . ? 
C17B C16B C15B 120.2(5) . . ? 
C17B C16B H16C 119.9 . . ? 
C15B C16B H16C 119.9 . . ? 
C16B C17B C18B 119.9(6) . . ? 
C16B C17B H17C 120.0 . . ? 
C18B C17B H17C 120.0 . . ? 
C13B C18B C17B 120.3(5) . . ? 
C13B C18B H18C 119.9 . . ? 
C17B C18B H18C 119.9 . . ? 
C24B C19B C20B 118.2(5) . . ? 
C24B C19B P2B 121.8(4) . . ? 
C20B C19B P2B 119.9(4) . . ? 
C21B C20B C19B 120.9(6) . . ? 
C21B C20B H20C 119.6 . . ? 
C19B C20B H20C 119.6 . . ? 
C22B C21B C20B 120.2(6) . . ? 
C22B C21B H21C 119.9 . . ? 
C20B C21B H21C 119.9 . . ? 
C21B C22B C23B 120.7(6) . . ? 
C21B C22B H22C 119.6 . . ? 
C23B C22B H22C 119.6 . . ? 
C24B C23B C22B 119.0(6) . . ? 
C24B C23B H23C 120.5 . . ? 
C22B C23B H23C 120.5 . . ? 
C19B C24B C23B 121.0(6) . . ? 
C19B C24B H24C 119.5 . . ? 
C23B C24B H24C 119.5 . . ? 
O1B C25B C26B 108.6(5) . . ? 
O1B C25B H25E 110.0 . . ? 
C26B C25B H25E 110.0 . . ? 
O1B C25B H25F 110.0 . . ? 
C26B C25B H25F 110.0 . . ? 
H25E C25B H25F 108.4 . . ? 
C27B C26B C25B 108.1(5) . . ? 
C27B C26B H26E 110.1 . . ? 
C25B C26B H26E 110.1 . . ? 
C27B C26B H26F 110.1 . . ? 
C25B C26B H26F 110.1 . . ? 
H26E C26B H26F 108.4 . . ? 
C26B C27B C28B 107.2(5) . . ? 
C26B C27B H27E 110.3 . . ? 
C28B C27B H27E 110.3 . . ? 
C26B C27B H27F 110.3 . . ? 
C28B C27B H27F 110.3 . . ? 
H27E C27B H27F 108.5 . . ? 
O1B C28B C27B 107.7(5) . . ? 
O1B C28B H28E 110.2 . . ? 
C27B C28B H28E 110.2 . . ? 
O1B C28B H28F 110.2 . . ? 
C27B C28B H28F 110.2 . . ? 
H28E C28B H28F 108.5 . . ? 
O2B C29B C30B 106.3(5) . . ? 
O2B C29B H29E 110.5 . . ? 
C30B C29B H29E 110.5 . . ? 
O2B C29B H29F 110.5 . . ? 
C30B C29B H29F 110.5 . . ? 
H29E C29B H29F 108.7 . . ? 
C31B C30B C29B 103.4(5) . . ? 
C31B C30B H30E 111.1 . . ? 
C29B C30B H30E 111.1 . . ? 
C31B C30B H30F 111.1 . . ? 
C29B C30B H30F 111.1 . . ? 
H30E C30B H30F 109.0 . . ? 
C32B C31B C30B 106.2(7) . . ? 
C32B C31B H31E 110.5 . . ? 
C30B C31B H31E 110.5 . . ? 
C32B C31B H31F 110.5 . . ? 
C30B C31B H31F 110.5 . . ? 
H31E C31B H31F 108.7 . . ? 
O2B C32B C31B 107.5(6) . . ? 
O2B C32B H32E 110.2 . . ? 
C31B C32B H32E 110.2 . . ? 
O2B C32B H32F 110.2 . . ? 
C31B C32B H32F 110.2 . . ? 
H32E C32B H32F 108.5 . . ? 
O3B C33B C34B 106.8(6) . . ? 
O3B C33B H33E 110.4 . . ? 
C34B C33B H33E 110.4 . . ? 
O3B C33B H33F 110.4 . . ? 
C34B C33B H33F 110.4 . . ? 
H33E C33B H33F 108.6 . . ? 
C35B C34B C33B 109.1(7) . . ? 
C35B C34B H34E 109.9 . . ? 
C33B C34B H34E 109.9 . . ? 
C35B C34B H34F 109.9 . . ? 
C33B C34B H34F 109.9 . . ? 
H34E C34B H34F 108.3 . . ? 
C34B C35B C36B 102.9(10) . . ? 
C34B C35B H35E 111.2 . . ? 
C36B C35B H35E 111.2 . . ? 
C34B C35B H35F 111.2 . . ? 
C36B C35B H35F 111.2 . . ? 
H35E C35B H35F 109.1 . . ? 
O3B C36B C35B 115.0(9) . . ? 
O3B C36B H36E 108.5 . . ? 
C35B C36B H36E 108.5 . . ? 
O3B C36B H36F 108.5 . . ? 
C35B C36B H36F 108.5 . . ? 
H36E C36B H36F 107.5 . . ? 
O3C Sr1C O2C 171.56(13) . . ? 
O3C Sr1C O1C 92.93(13) . . ? 
O2C Sr1C O1C 79.04(13) . . ? 
O3C Sr1C Se4C 86.60(10) . . ? 
O2C Sr1C Se4C 98.68(10) . . ? 
O1C Sr1C Se4C 146.91(10) . . ? 
O3C Sr1C Se2C 102.10(9) . . ? 
O2C Sr1C Se2C 85.89(9) . . ? 
O1C Sr1C Se2C 140.48(9) . . ? 
Se4C Sr1C Se2C 71.181(18) . . ? 
O3C Sr1C Se1C 79.51(10) . . ? 
O2C Sr1C Se1C 101.15(11) . . ? 
O1C Sr1C Se1C 78.25(10) . . ? 
Se4C Sr1C Se1C 133.74(2) . . ? 
Se2C Sr1C Se1C 69.097(18) . . ? 
O3C Sr1C Se3C 88.18(10) . . ? 
O2C Sr1C Se3C 87.59(10) . . ? 
O1C Sr1C Se3C 77.93(10) . . ? 
Se4C Sr1C Se3C 68.981(18) . . ? 
Se2C Sr1C Se3C 138.06(2) . . ? 
Se1C Sr1C Se3C 152.50(2) . . ? 
O3C Sr1C P2C 77.42(10) . . ? 
O2C Sr1C P2C 103.07(11) . . ? 
O1C Sr1C P2C 112.23(10) . . ? 
Se4C Sr1C P2C 35.55(2) . . ? 
Se2C Sr1C P2C 106.68(3) . . ? 
Se1C Sr1C P2C 155.04(3) . . ? 
Se3C Sr1C P2C 35.65(3) . . ? 
P1C Se1C Sr1C 87.93(5) . . ? 
P1C Se2C Sr1C 88.72(4) . . ? 
P2C Se3C Sr1C 84.16(5) . . ? 
P2C Se4C Sr1C 85.77(4) . . ? 
C7C P1C C1C 103.3(3) . . ? 
C7C P1C Se2C 108.72(19) . . ? 
C1C P1C Se2C 110.85(19) . . ? 
C7C P1C Se1C 110.95(19) . . ? 
C1C P1C Se1C 108.23(16) . . ? 
Se2C P1C Se1C 114.25(7) . . ? 
C13C P2C C19C 103.3(2) . . ? 
C13C P2C Se4C 109.04(18) . . ? 
C19C P2C Se4C 110.20(19) . . ? 
C13C P2C Se3C 109.69(18) . . ? 
C19C P2C Se3C 110.27(17) . . ? 
Se4C P2C Se3C 113.79(7) . . ? 
C13C P2C Sr1C 148.78(18) . . ? 
C19C P2C Sr1C 107.87(18) . . ? 
Se4C P2C Sr1C 58.69(4) . . ? 
Se3C P2C Sr1C 60.20(4) . . ? 
C25C O1C C28C 107.7(5) . . ? 
C25C O1C Sr1C 130.5(4) . . ? 
C28C O1C Sr1C 121.8(3) . . ? 
C29C O2C C32C 109.4(5) . . ? 
C29C O2C Sr1C 130.7(4) . . ? 
C32C O2C Sr1C 119.7(4) . . ? 
C36C O3C C33C 107.6(5) . . ? 
C36C O3C Sr1C 130.5(4) . . ? 
C33C O3C Sr1C 118.9(4) . . ? 
C6C C1C C2C 120.5(5) . . ? 
C6C C1C P1C 119.6(4) . . ? 
C2C C1C P1C 119.6(5) . . ? 
C1C C2C C3C 118.8(6) . . ? 
C1C C2C H2CA 120.6 . . ? 
C3C C2C H2CA 120.6 . . ? 
C4C C3C C2C 120.0(6) . . ? 
C4C C3C H3CA 120.0 . . ? 
C2C C3C H3CA 120.0 . . ? 
C5C C4C C3C 120.2(6) . . ? 
C5C C4C H4CA 119.9 . . ? 
C3C C4C H4CA 119.9 . . ? 
C4C C5C C6C 120.3(7) . . ? 
C4C C5C H5CA 119.8 . . ? 
C6C C5C H5CA 119.8 . . ? 
C1C C6C C5C 120.2(6) . . ? 
C1C C6C H6CA 119.9 . . ? 
C5C C6C H6CA 119.9 . . ? 
C12C C7C C8C 119.6(6) . . ? 
C12C C7C P1C 119.7(5) . . ? 
C8C C7C P1C 120.7(5) . . ? 
C7C C8C C9C 120.2(6) . . ? 
C7C C8C H8CA 119.9 . . ? 
C9C C8C H8CA 119.9 . . ? 
C10C C9C C8C 119.6(7) . . ? 
C10C C9C H9CA 120.2 . . ? 
C8C C9C H9CA 120.2 . . ? 
C9C C10C C11C 120.7(8) . . ? 
C9C C10C H10B 119.7 . . ? 
C11C C10C H10B 119.7 . . ? 
C10C C11C C12C 120.4(7) . . ? 
C10C C11C H11B 119.8 . . ? 
C12C C11C H11B 119.8 . . ? 
C7C C12C C11C 119.4(7) . . ? 
C7C C12C H12B 120.3 . . ? 
C11C C12C H12B 120.3 . . ? 
C18C C13C C14C 118.8(6) . . ? 
C18C C13C P2C 119.9(5) . . ? 
C14C C13C P2C 121.3(4) . . ? 
C15C C14C C13C 121.2(6) . . ? 
C15C C14C H14B 119.4 . . ? 
C13C C14C H14B 119.4 . . ? 
C16C C15C C14C 118.8(6) . . ? 
C16C C15C H15B 120.6 . . ? 
C14C C15C H15B 120.6 . . ? 
C17C C16C C15C 120.9(7) . . ? 
C17C C16C H16B 119.6 . . ? 
C15C C16C H16B 119.6 . . ? 
C16C C17C C18C 120.3(6) . . ? 
C16C C17C H17B 119.9 . . ? 
C18C C17C H17B 119.9 . . ? 
C13C C18C C17C 120.0(6) . . ? 
C13C C18C H18B 120.0 . . ? 
C17C C18C H18B 120.0 . . ? 
C20C C19C C24C 119.0(5) . . ? 
C20C C19C P2C 121.7(4) . . ? 
C24C C19C P2C 119.2(4) . . ? 
C19C C20C C21C 120.7(5) . . ? 
C19C C20C H20B 119.7 . . ? 
C21C C20C H20B 119.7 . . ? 
C22C C21C C20C 120.6(6) . . ? 
C22C C21C H21B 119.7 . . ? 
C20C C21C H21B 119.7 . . ? 
C21C C22C C23C 118.8(5) . . ? 
C21C C22C H22B 120.6 . . ? 
C23C C22C H22B 120.6 . . ? 
C24C C23C C22C 120.6(5) . . ? 
C24C C23C H23B 119.7 . . ? 
C22C C23C H23B 119.7 . . ? 
C19C C24C C23C 120.4(5) . . ? 
C19C C24C H24B 119.8 . . ? 
C23C C24C H24B 119.8 . . ? 
O1C C25C C26C 105.7(5) . . ? 
O1C C25C H25C 110.6 . . ? 
C26C C25C H25C 110.6 . . ? 
O1C C25C H25D 110.6 . . ? 
C26C C25C H25D 110.6 . . ? 
H25C C25C H25D 108.7 . . ? 
C27C C26C C25C 104.5(5) . . ? 
C27C C26C H26C 110.9 . . ? 
C25C C26C H26C 110.9 . . ? 
C27C C26C H26D 110.9 . . ? 
C25C C26C H26D 110.9 . . ? 
H26C C26C H26D 108.9 . . ? 
C28C C27C C26C 105.3(6) . . ? 
C28C C27C H27C 110.7 . . ? 
C26C C27C H27C 110.7 . . ? 
C28C C27C H27D 110.7 . . ? 
C26C C27C H27D 110.7 . . ? 
H27C C27C H27D 108.8 . . ? 
O1C C28C C27C 108.8(6) . . ? 
O1C C28C H28C 109.9 . . ? 
C27C C28C H28C 109.9 . . ? 
O1C C28C H28D 109.9 . . ? 
C27C C28C H28D 109.9 . . ? 
H28C C28C H28D 108.3 . . ? 
O2C C29C C30C 105.2(6) . . ? 
O2C C29C H29C 110.7 . . ? 
C30C C29C H29C 110.7 . . ? 
O2C C29C H29D 110.7 . . ? 
C30C C29C H29D 110.7 . . ? 
H29C C29C H29D 108.8 . . ? 
C31C C30C C29C 102.0(6) . . ? 
C31C C30C H30C 111.4 . . ? 
C29C C30C H30C 111.4 . . ? 
C31C C30C H30D 111.4 . . ? 
C29C C30C H30D 111.4 . . ? 
H30C C30C H30D 109.2 . . ? 
C30C C31C C32C 104.2(7) . . ? 
C30C C31C H31C 110.9 . . ? 
C32C C31C H31C 110.9 . . ? 
C30C C31C H31D 110.9 . . ? 
C32C C31C H31D 110.9 . . ? 
H31C C31C H31D 108.9 . . ? 
O2C C32C C31C 105.1(7) . . ? 
O2C C32C H32C 110.7 . . ? 
C31C C32C H32C 110.7 . . ? 
O2C C32C H32D 110.7 . . ? 
C31C C32C H32D 110.7 . . ? 
H32C C32C H32D 108.8 . . ? 
C34C C33C O3C 104.6(7) . . ? 
C34C C33C H33C 110.8 . . ? 
O3C C33C H33C 110.8 . . ? 
C34C C33C H33D 110.8 . . ? 
O3C C33C H33D 110.8 . . ? 
H33C C33C H33D 108.9 . . ? 
C33C C34C C35C 110.7(8) . . ? 
C33C C34C H34C 109.5 . . ? 
C35C C34C H34C 109.5 . . ? 
C33C C34C H34D 109.5 . . ? 
C35C C34C H34D 109.5 . . ? 
H34C C34C H34D 108.1 . . ? 
C34C C35C C36C 103.0(7) . . ? 
C34C C35C H35C 111.2 . . ? 
C36C C35C H35C 111.2 . . ? 
C34C C35C H35D 111.2 . . ? 
C36C C35C H35D 111.2 . . ? 
H35C C35C H35D 109.1 . . ? 
O3C C36C C35C 107.8(6) . . ? 
O3C C36C H36C 110.1 . . ? 
C35C C36C H36C 110.1 . . ? 
O3C C36C H36D 110.1 . . ? 
C35C C36C H36D 110.1 . . ? 
H36C C36C H36D 108.5 . . ? 
 
_diffrn_measured_fraction_theta_max    0.973 
_diffrn_reflns_theta_full              27.51 
_diffrn_measured_fraction_theta_full   0.973 
_refine_diff_density_max    1.331 
_refine_diff_density_min   -0.862 
_refine_diff_density_rms    0.134 
 

#=== END

data_FO3541 
 
_audit_creation_method            SHELXL-97 
_chemical_name_systematic 
? 
_chemical_name_common             ? 
_chemical_melting_point           ? 
_chemical_formula_moiety          'C32 H36 Ca O4 P2 S2, C4 H8 O' 
_chemical_formula_sum             'C36 H44 Ca O5 P2 S2' 
_chemical_formula_weight          722.85 
 
loop_ 
 _atom_type_symbol 
 _atom_type_description 
 _atom_type_scat_dispersion_real 
 _atom_type_scat_dispersion_imag 
 _atom_type_scat_source 
 'C'  'C'   0.0033   0.0016 
 'International Tables Vol C Tables 4.2.6.8 and 6.1.1.4' 
 'H'  'H'   0.0000   0.0000 
 'International Tables Vol C Tables 4.2.6.8 and 6.1.1.4' 
 'O'  'O'   0.0106   0.0060 
 'International Tables Vol C Tables 4.2.6.8 and 6.1.1.4' 
 'P'  'P'   0.1023   0.0942 
 'International Tables Vol C Tables 4.2.6.8 and 6.1.1.4' 
 'S'  'S'   0.1246   0.1234 
 'International Tables Vol C Tables 4.2.6.8 and 6.1.1.4' 
 'Ca'  'Ca'   0.2262   0.3064 
 'International Tables Vol C Tables 4.2.6.8 and 6.1.1.4' 
 
_symmetry_cell_setting            monoclinic 
_symmetry_space_group_name_H-M    'P 21/n'
_symmetry_space_group_name_Hall   '-P 2yn'
 
loop_ 
 _symmetry_equiv_pos_as_xyz 
 'x, y, z' 
 '-x+1/2, y+1/2, -z+1/2' 
 '-x, -y, -z' 
 'x-1/2, -y-1/2, z-1/2' 
 
_cell_length_a                    12.7135(3) 
_cell_length_b                    17.4860(4) 
_cell_length_c                    19.4052(5) 
_cell_angle_alpha                 90.00 
_cell_angle_beta                  100.702(1) 
_cell_angle_gamma                 90.00 
_cell_volume                      4238.90(18) 
_cell_formula_units_Z             4 
_cell_measurement_temperature     183(2) 
_cell_measurement_reflns_used     ? 
_cell_measurement_theta_min       ? 
_cell_measurement_theta_max       ? 
 
_exptl_crystal_description        prism 
_exptl_crystal_colour             colourless
_exptl_crystal_size_max           0.05 
_exptl_crystal_size_mid           0.05 
_exptl_crystal_size_min           0.05 
_exptl_crystal_density_meas       ? 
_exptl_crystal_density_diffrn     1.133 
_exptl_crystal_density_method     'not measured' 
_exptl_crystal_F_000              1528 
_exptl_absorpt_coefficient_mu     0.357 
_exptl_absorpt_correction_type    none 
_exptl_absorpt_correction_T_min   ?
_exptl_absorpt_correction_T_max   ?
_exptl_absorpt_process_details    ? 
 
_exptl_special_details 
? 
 
_diffrn_ambient_temperature       183(2) 
_diffrn_radiation_wavelength      0.71073 
_diffrn_radiation_type            MoK\a 
_diffrn_radiation_source          'fine-focus sealed tube' 
_diffrn_radiation_monochromator   graphite 
_diffrn_measurement_device_type   KappaCCD 
_diffrn_measurement_method        'phi- + omega-scan'
_diffrn_detector_area_resol_mean  ? 
_diffrn_standards_number          ? 
_diffrn_standards_interval_count  ? 
_diffrn_standards_interval_time   ? 
_diffrn_standards_decay_%         ? 
_diffrn_reflns_number             28446 
_diffrn_reflns_av_R_equivalents   0.0465 
_diffrn_reflns_av_sigmaI/netI     0.0513 
_diffrn_reflns_limit_h_min        -13 
_diffrn_reflns_limit_h_max        16 
_diffrn_reflns_limit_k_min        -21 
_diffrn_reflns_limit_k_max        22 
_diffrn_reflns_limit_l_min        -23 
_diffrn_reflns_limit_l_max        25 
_diffrn_reflns_theta_min          1.58 
_diffrn_reflns_theta_max          27.49 
_reflns_number_total              9650 
_reflns_number_gt                 6729 
_reflns_threshold_expression      >2sigma(I) 
 
_computing_data_collection        COLLECT 
_computing_cell_refinement        DENZO
_computing_data_reduction         DENZO
_computing_structure_solution     'SHELXS-97 (Sheldrick, 1990)' 
_computing_structure_refinement   'SHELXL-97 (Sheldrick, 1997)' 
_computing_molecular_graphics     SHELXTL/PC
_computing_publication_material   SHELXL-97
 
_refine_special_details 
; 
 Refinement of F^2^ against ALL reflections.  The weighted R-factor wR and 
 goodness of fit S are based on F^2^, conventional R-factors R are based 
 on F, with F set to zero for negative F^2^. The threshold expression of 
 F^2^ > 2sigma(F^2^) is used only for calculating R-factors(gt) etc. and is 
 not relevant to the choice of reflections for refinement.  R-factors based 
 on F^2^ are statistically about twice as large as those based on F, and R- 
 factors based on ALL data will be even larger. 
; 
 
_refine_ls_structure_factor_coef  Fsqd  
_refine_ls_matrix_type            full 
_refine_ls_weighting_scheme       calc  
_refine_ls_weighting_details 
 'calc w=1/[\s^2^(Fo^2^)+(0.1626P)^2^+0.8874P] where P=(Fo^2^+2Fc^2^)/3' 
_atom_sites_solution_primary      direct 
_atom_sites_solution_secondary    difmap 
_atom_sites_solution_hydrogens    geom 
_refine_ls_hydrogen_treatment     constr 
_refine_ls_extinction_method      none 
_refine_ls_extinction_coef        ? 
_refine_ls_number_reflns          9650 
_refine_ls_number_parameters      460 
_refine_ls_number_restraints      0 
_refine_ls_R_factor_all           0.1053 
_refine_ls_R_factor_gt            0.0733 
_refine_ls_wR_factor_ref          0.2440 
_refine_ls_wR_factor_gt           0.2241 
_refine_ls_goodness_of_fit_ref    1.057 
_refine_ls_restrained_S_all       1.057 
_refine_ls_shift/su_max           0.001 
_refine_ls_shift/su_mean          0.000 
 
loop_ 
 _atom_site_label 
 _atom_site_type_symbol 
 _atom_site_fract_x 
 _atom_site_fract_y 
 _atom_site_fract_z 
 _atom_site_U_iso_or_equiv 
 _atom_site_adp_type 
 _atom_site_occupancy 
 _atom_site_symmetry_multiplicity 
 _atom_site_calc_flag 
 _atom_site_refinement_flags 
 _atom_site_disorder_assembly 
 _atom_site_disorder_group 
Ca1 Ca 0.57394(5) 0.07981(4) -0.09112(3) 0.0321(2) Uani 1 1 d . . . 
S1 S 0.75412(7) 0.15946(5) -0.12284(4) 0.0404(2) Uani 1 1 d . . . 
S2 S 0.52478(7) 0.12318(5) -0.23828(5) 0.0429(2) Uani 1 1 d . . . 
P1 P 0.66021(7) 0.18315(5) -0.21523(4) 0.0339(2) Uani 1 1 d . . . 
P2 P 0.66026(7) 0.04260(5) 0.09140(4) 0.0332(2) Uani 1 1 d . . . 
O1 O 0.6500(2) 0.08196(17) 0.02248(14) 0.0560(7) Uani 1 1 d . . . 
O2 O 0.5792(2) -0.01714(15) 0.09943(14) 0.0458(6) Uani 1 1 d . . . 
O3 O 0.4861(2) 0.19365(14) -0.06680(14) 0.0467(6) Uani 1 1 d . . . 
O4 O 0.6532(2) -0.03949(15) -0.10776(16) 0.0555(7) Uani 1 1 d . . . 
C1 C 0.6305(3) 0.2856(2) -0.21627(17) 0.0379(7) Uani 1 1 d . . . 
C2 C 0.7062(3) 0.3354(2) -0.1801(2) 0.0478(9) Uani 1 1 d . . . 
H2A H 0.7722 0.3160 -0.1552 0.057 Uiso 1 1 calc R . . 
C3 C 0.6856(4) 0.4143(2) -0.1800(2) 0.0585(11) Uani 1 1 d . . . 
H3A H 0.7376 0.4486 -0.1557 0.070 Uiso 1 1 calc R . . 
C4 C 0.5887(4) 0.4414(2) -0.2159(2) 0.0609(11) Uani 1 1 d . . . 
H4A H 0.5736 0.4945 -0.2154 0.073 Uiso 1 1 calc R . . 
C5 C 0.5137(4) 0.3923(3) -0.2524(2) 0.0574(11) Uani 1 1 d . . . 
H5A H 0.4478 0.4118 -0.2773 0.069 Uiso 1 1 calc R . . 
C6 C 0.5344(3) 0.3133(2) -0.25284(19) 0.0455(8) Uani 1 1 d . . . 
H6A H 0.4828 0.2793 -0.2780 0.055 Uiso 1 1 calc R . . 
C7 C 0.7384(3) 0.17015(19) -0.28411(17) 0.0379(7) Uani 1 1 d . . . 
C8 C 0.8406(3) 0.2030(2) -0.2773(2) 0.0489(9) Uani 1 1 d . . . 
H8A H 0.8681 0.2330 -0.2372 0.059 Uiso 1 1 calc R . . 
C9 C 0.9013(3) 0.1919(3) -0.3287(2) 0.0579(11) Uani 1 1 d . . . 
H9A H 0.9705 0.2140 -0.3238 0.069 Uiso 1 1 calc R . . 
C10 C 0.8612(4) 0.1487(3) -0.3873(2) 0.0597(12) Uani 1 1 d . . . 
H10A H 0.9032 0.1405 -0.4223 0.072 Uiso 1 1 calc R . . 
C11 C 0.7607(4) 0.1177(3) -0.3949(2) 0.0654(12) Uani 1 1 d . . . 
H11A H 0.7332 0.0887 -0.4357 0.079 Uiso 1 1 calc R . . 
C12 C 0.6986(4) 0.1278(2) -0.3441(2) 0.0520(9) Uani 1 1 d . . . 
H12A H 0.6291 0.1060 -0.3501 0.062 Uiso 1 1 calc R . . 
C13 C 0.6576(3) 0.1134(2) 0.1593(2) 0.0531(10) Uani 1 1 d . . . 
C14 C 0.5990(4) 0.1009(3) 0.2124(2) 0.0647(12) Uani 1 1 d . . . 
H14A H 0.5587 0.0550 0.2113 0.078 Uiso 1 1 calc R . . 
C15 C 0.5967(5) 0.1516(4) 0.2657(3) 0.0869(18) Uani 1 1 d . . . 
H15A H 0.5550 0.1417 0.3006 0.104 Uiso 1 1 calc R . . 
C16 C 0.6569(6) 0.2178(4) 0.2674(4) 0.097(2) Uani 1 1 d . . . 
H16A H 0.6581 0.2528 0.3050 0.116 Uiso 1 1 calc R . . 
C17 C 0.7147(6) 0.2340(3) 0.2167(4) 0.094(2) Uani 1 1 d . . . 
H17A H 0.7534 0.2807 0.2180 0.113 Uiso 1 1 calc R . . 
C18 C 0.7165(4) 0.1798(2) 0.1611(3) 0.0765(16) Uani 1 1 d . . . 
H18A H 0.7579 0.1897 0.1261 0.092 Uiso 1 1 calc R . . 
C19 C 0.7908(3) -0.00149(19) 0.11178(17) 0.0371(7) Uani 1 1 d . . . 
C20 C 0.8695(3) 0.0135(3) 0.0731(2) 0.0621(12) Uani 1 1 d . . . 
H20A H 0.8557 0.0477 0.0345 0.074 Uiso 1 1 calc R . . 
C21 C 0.9691(4) -0.0219(4) 0.0910(3) 0.0841(18) Uani 1 1 d . . . 
H21A H 1.0238 -0.0113 0.0650 0.101 Uiso 1 1 calc R . . 
C22 C 0.9879(4) -0.0723(3) 0.1465(4) 0.091(2) Uani 1 1 d . . . 
H22A H 1.0554 -0.0971 0.1579 0.109 Uiso 1 1 calc R . . 
C23 C 0.9122(4) -0.0870(2) 0.1848(3) 0.0718(15) Uani 1 1 d . . . 
H23A H 0.9266 -0.1209 0.2237 0.086 Uiso 1 1 calc R . . 
C24 C 0.8141(3) -0.0524(2) 0.1671(2) 0.0503(10) Uani 1 1 d . . . 
H24A H 0.7603 -0.0638 0.1936 0.060 Uiso 1 1 calc R . . 
C25 C 0.5375(3) 0.2566(2) -0.0261(2) 0.0534(10) Uani 1 1 d . . . 
H25A H 0.6151 0.2571 -0.0268 0.064 Uiso 1 1 calc R . . 
H25B H 0.5276 0.2526 0.0232 0.064 Uiso 1 1 calc R . . 
C26 C 0.4855(4) 0.3271(2) -0.0592(2) 0.0555(10) Uani 1 1 d . . . 
H26A H 0.5184 0.3439 -0.0991 0.067 Uiso 1 1 calc R . . 
H26B H 0.4892 0.3693 -0.0249 0.067 Uiso 1 1 calc R . . 
C27 C 0.3709(4) 0.3002(3) -0.0839(3) 0.0631(12) Uani 1 1 d . . . 
H27A H 0.3295 0.3031 -0.0455 0.076 Uiso 1 1 calc R . . 
H27B H 0.3345 0.3312 -0.1240 0.076 Uiso 1 1 calc R . . 
C28 C 0.3840(3) 0.2193(2) -0.1052(2) 0.0522(10) Uani 1 1 d . . . 
H28A H 0.3255 0.1872 -0.0937 0.063 Uiso 1 1 calc R . . 
H28B H 0.3825 0.2161 -0.1563 0.063 Uiso 1 1 calc R . . 
C29 C 0.7202(4) -0.0613(3) -0.1574(3) 0.0669(13) Uani 1 1 d . . . 
H29A H 0.7641 -0.0175 -0.1677 0.080 Uiso 1 1 calc R . . 
H29B H 0.6758 -0.0793 -0.2019 0.080 Uiso 1 1 calc R . . 
C30 C 0.7908(4) -0.1253(3) -0.1221(3) 0.0695(13) Uani 1 1 d . . . 
H30A H 0.8661 -0.1080 -0.1094 0.083 Uiso 1 1 calc R . . 
H30B H 0.7877 -0.1700 -0.1537 0.083 Uiso 1 1 calc R . . 
C31 C 0.7475(3) -0.1459(2) -0.0569(2) 0.0543(10) Uani 1 1 d . . . 
H31A H 0.7387 -0.2019 -0.0534 0.065 Uiso 1 1 calc R . . 
H31B H 0.7959 -0.1274 -0.0142 0.065 Uiso 1 1 calc R . . 
C32 C 0.6410(3) -0.1059(2) -0.0665(2) 0.0501(9) Uani 1 1 d . . . 
H32A H 0.5833 -0.1393 -0.0913 0.060 Uiso 1 1 calc R . . 
H32B H 0.6237 -0.0911 -0.0207 0.060 Uiso 1 1 calc R . . 
O1TA O 0.7268(8) 0.0028(6) 0.4607(5) 0.122(4) Uani 0.50 1 d P . . 
C1TA C 0.6852(11) 0.0064(6) 0.3984(6) 0.079(3) Uani 0.50 1 d P . . 
H1TA H 0.6682 0.0605 0.3860 0.095 Uiso 0.50 1 calc PR . . 
H1TB H 0.6169 -0.0223 0.3911 0.095 Uiso 0.50 1 calc PR . . 
C2TA C 0.7509(9) -0.0235(6) 0.3523(4) 0.072(3) Uani 0.50 1 d P . . 
H2TA H 0.7592 0.0140 0.3155 0.086 Uiso 0.50 1 calc PR . . 
H2TB H 0.7206 -0.0715 0.3297 0.086 Uiso 0.50 1 calc PR . . 
C3TA C 0.8747(14) -0.0405(9) 0.4093(12) 0.166(10) Uani 0.50 1 d P . . 
H3TA H 0.9053 -0.0916 0.4033 0.200 Uiso 0.50 1 calc PR . . 
H3TB H 0.9284 0.0001 0.4080 0.200 Uiso 0.50 1 calc PR . . 
C4TA C 0.8206(7) -0.0353(6) 0.4711(4) 0.062(2) Uani 0.50 1 d P . . 
H4TA H 0.8079 -0.0879 0.4866 0.074 Uiso 0.50 1 calc PR . . 
H4TB H 0.8702 -0.0101 0.5098 0.074 Uiso 0.50 1 calc PR . . 
O1TB O 0.5058(6) -0.2501(4) 0.4901(4) 0.0776(19) Uani 0.50 1 d P . . 
C1TB C 0.4684(7) -0.2304(5) 0.5582(4) 0.0513(18) Uani 0.50 1 d P . . 
H1TC H 0.3893 -0.2281 0.5502 0.062 Uiso 0.50 1 calc PR . . 
H1TD H 0.4930 -0.2699 0.5941 0.062 Uiso 0.50 1 calc PR . . 
C2TB C 0.5115(6) -0.1602(4) 0.5803(4) 0.0445(17) Uani 0.50 1 d P . . 
H2TC H 0.5729 -0.1671 0.6194 0.053 Uiso 0.50 1 calc PR . . 
H2TD H 0.4570 -0.1285 0.5973 0.053 Uiso 0.50 1 calc PR . . 
C3TB C 0.5449(7) -0.1243(4) 0.5247(5) 0.056(2) Uani 0.50 1 d P . . 
H3TC H 0.6045 -0.0887 0.5417 0.068 Uiso 0.50 1 calc PR . . 
H3TD H 0.4853 -0.0953 0.4963 0.068 Uiso 0.50 1 calc PR . . 
C4TB C 0.5807(6) -0.1870(5) 0.4828(4) 0.0500(18) Uani 0.50 1 d P . . 
H4TC H 0.6556 -0.2018 0.5019 0.060 Uiso 0.50 1 calc PR . . 
H4TD H 0.5749 -0.1718 0.4331 0.060 Uiso 0.50 1 calc PR . . 
 
loop_ 
 _atom_site_aniso_label 
 _atom_site_aniso_U_11 
 _atom_site_aniso_U_22 
 _atom_site_aniso_U_33 
 _atom_site_aniso_U_23 
 _atom_site_aniso_U_13 
 _atom_site_aniso_U_12 
Ca1 0.0300(4) 0.0336(4) 0.0333(4) 0.0056(3) 0.0069(3) 0.0028(2) 
S1 0.0324(4) 0.0490(5) 0.0387(5) 0.0103(4) 0.0036(3) -0.0002(3) 
S2 0.0390(5) 0.0519(5) 0.0361(5) 0.0052(4) 0.0027(4) -0.0055(4) 
P1 0.0332(5) 0.0384(5) 0.0307(4) 0.0064(3) 0.0070(3) 0.0041(3) 
P2 0.0313(4) 0.0356(4) 0.0304(4) -0.0005(3) -0.0003(3) -0.0014(3) 
O1 0.0550(17) 0.0680(18) 0.0412(14) 0.0150(13) -0.0010(12) -0.0019(13) 
O2 0.0365(13) 0.0486(14) 0.0537(15) -0.0023(12) 0.0125(11) -0.0063(11) 
O3 0.0428(14) 0.0427(13) 0.0499(15) -0.0059(11) -0.0035(11) 0.0111(11) 
O4 0.0657(18) 0.0410(14) 0.0695(18) 0.0070(13) 0.0381(15) 0.0151(12) 
C1 0.0446(19) 0.0404(18) 0.0310(16) 0.0054(14) 0.0126(14) 0.0062(14) 
C2 0.046(2) 0.050(2) 0.047(2) 0.0042(17) 0.0058(17) 0.0063(16) 
C3 0.077(3) 0.042(2) 0.056(2) -0.0020(18) 0.011(2) 0.0043(19) 
C4 0.086(3) 0.043(2) 0.055(2) 0.0091(19) 0.016(2) 0.016(2) 
C5 0.062(3) 0.058(2) 0.051(2) 0.014(2) 0.007(2) 0.025(2) 
C6 0.046(2) 0.048(2) 0.0411(19) 0.0071(16) 0.0041(16) 0.0103(16) 
C7 0.0416(19) 0.0397(17) 0.0340(17) 0.0104(14) 0.0111(14) 0.0119(14) 
C8 0.041(2) 0.061(2) 0.047(2) 0.0056(18) 0.0124(16) 0.0058(17) 
C9 0.044(2) 0.083(3) 0.050(2) 0.016(2) 0.0188(18) 0.014(2) 
C10 0.065(3) 0.072(3) 0.048(2) 0.015(2) 0.028(2) 0.021(2) 
C11 0.093(4) 0.067(3) 0.042(2) -0.009(2) 0.027(2) -0.002(3) 
C12 0.061(3) 0.054(2) 0.044(2) -0.0027(17) 0.0158(18) -0.0020(19) 
C13 0.048(2) 0.045(2) 0.056(2) -0.0116(18) -0.0181(18) 0.0152(17) 
C14 0.065(3) 0.078(3) 0.048(2) -0.016(2) 0.001(2) 0.022(2) 
C15 0.097(4) 0.101(4) 0.059(3) -0.023(3) 0.002(3) 0.041(4) 
C16 0.099(5) 0.085(4) 0.089(4) -0.036(4) -0.028(4) 0.047(4) 
C17 0.094(4) 0.061(3) 0.105(5) -0.029(3) -0.037(4) 0.017(3) 
C18 0.071(3) 0.045(2) 0.099(4) -0.009(2) -0.024(3) 0.003(2) 
C19 0.0332(17) 0.0390(17) 0.0370(17) -0.0095(14) 0.0010(13) -0.0041(13) 
C20 0.036(2) 0.099(4) 0.052(2) -0.017(2) 0.0097(18) -0.010(2) 
C21 0.042(3) 0.136(5) 0.076(3) -0.048(4) 0.014(2) -0.001(3) 
C22 0.055(3) 0.080(4) 0.120(5) -0.057(4) -0.025(3) 0.027(3) 
C23 0.050(3) 0.041(2) 0.113(4) -0.004(2) -0.018(3) 0.0048(18) 
C24 0.040(2) 0.0372(18) 0.067(3) 0.0018(18) -0.0079(18) 0.0012(15) 
C25 0.051(2) 0.050(2) 0.057(2) -0.0146(19) 0.0035(18) 0.0025(18) 
C26 0.075(3) 0.048(2) 0.048(2) -0.0067(18) 0.022(2) -0.003(2) 
C27 0.069(3) 0.052(2) 0.064(3) -0.010(2) 0.001(2) 0.021(2) 
C28 0.043(2) 0.052(2) 0.058(2) -0.0041(19) -0.0012(18) 0.0114(17) 
C29 0.074(3) 0.066(3) 0.072(3) 0.002(2) 0.043(3) 0.015(2) 
C30 0.060(3) 0.058(3) 0.099(4) -0.011(3) 0.037(3) 0.010(2) 
C31 0.050(2) 0.045(2) 0.068(3) -0.0002(19) 0.010(2) 0.0065(17) 
C32 0.057(2) 0.0391(19) 0.058(2) 0.0082(18) 0.0223(19) 0.0056(17) 
O1TA 0.113(7) 0.137(8) 0.101(7) -0.036(6) -0.021(5) 0.064(6) 
C1TA 0.111(9) 0.065(6) 0.067(6) -0.008(5) 0.029(6) -0.015(6) 
C2TA 0.088(7) 0.083(7) 0.037(4) -0.010(4) -0.007(4) 0.026(5) 
C3TA 0.148(15) 0.091(10) 0.30(3) 0.047(13) 0.143(18) 0.064(10) 
C4TA 0.063(5) 0.084(6) 0.034(4) -0.013(4) -0.004(4) 0.032(5) 
O1TB 0.074(5) 0.068(4) 0.086(5) -0.006(4) 0.003(4) -0.006(3) 
C1TB 0.046(4) 0.053(5) 0.056(5) 0.001(4) 0.014(4) -0.009(3) 
C2TB 0.051(4) 0.032(3) 0.055(4) -0.015(3) 0.019(3) 0.002(3) 
C3TB 0.056(5) 0.035(4) 0.073(6) 0.004(4) -0.004(4) -0.009(3) 
C4TB 0.043(4) 0.057(5) 0.049(4) 0.011(4) 0.007(3) -0.010(3) 
 
_geom_special_details 
; 
 All esds (except the esd in the dihedral angle between two l.s. planes) 
 are estimated using the full covariance matrix.  The cell esds are taken 
 into account individually in the estimation of esds in distances, angles 
 and torsion angles; correlations between esds in cell parameters are only 
 used when they are defined by crystal symmetry.  An approximate (isotropic) 
 treatment of cell esds is used for estimating esds involving l.s. planes. 
; 
 
loop_ 
 _geom_bond_atom_site_label_1 
 _geom_bond_atom_site_label_2 
 _geom_bond_distance 
 _geom_bond_site_symmetry_2 
 _geom_bond_publ_flag 
Ca1 O2 2.214(2) 3_655 ? 
Ca1 O1 2.237(3) . ? 
Ca1 O4 2.365(3) . ? 
Ca1 O3 2.372(2) . ? 
Ca1 S1 2.8442(11) . ? 
Ca1 S2 2.9081(11) . ? 
Ca1 P1 3.3540(10) . ? 
Ca1 P2 3.5678(10) . ? 
S1 P1 2.0041(12) . ? 
S2 P1 1.9945(12) . ? 
P1 C7 1.822(3) . ? 
P1 C1 1.830(3) . ? 
P2 O1 1.488(3) . ? 
P2 O2 1.496(3) . ? 
P2 C19 1.806(3) . ? 
P2 C13 1.813(4) . ? 
O2 Ca1 2.214(2) 3_655 ? 
O3 C25 1.439(4) . ? 
O3 C28 1.443(4) . ? 
O4 C32 1.435(5) . ? 
O4 C29 1.450(5) . ? 
C1 C6 1.382(5) . ? 
C1 C2 1.388(5) . ? 
C2 C3 1.404(6) . ? 
C2 H2A 0.9500 . ? 
C3 C4 1.381(7) . ? 
C3 H3A 0.9500 . ? 
C4 C5 1.377(7) . ? 
C4 H4A 0.9500 . ? 
C5 C6 1.406(5) . ? 
C5 H5A 0.9500 . ? 
C6 H6A 0.9500 . ? 
C7 C12 1.393(5) . ? 
C7 C8 1.403(5) . ? 
C8 C9 1.385(5) . ? 
C8 H8A 0.9500 . ? 
C9 C10 1.381(7) . ? 
C9 H9A 0.9500 . ? 
C10 C11 1.371(7) . ? 
C10 H10A 0.9500 . ? 
C11 C12 1.385(6) . ? 
C11 H11A 0.9500 . ? 
C12 H12A 0.9500 . ? 
C13 C18 1.379(6) . ? 
C13 C14 1.396(7) . ? 
C14 C15 1.368(7) . ? 
C14 H14A 0.9500 . ? 
C15 C16 1.385(10) . ? 
C15 H15A 0.9500 . ? 
C16 C17 1.364(10) . ? 
C16 H16A 0.9500 . ? 
C17 C18 1.438(8) . ? 
C17 H17A 0.9500 . ? 
C18 H18A 0.9500 . ? 
C19 C20 1.382(5) . ? 
C19 C24 1.384(5) . ? 
C20 C21 1.394(7) . ? 
C20 H20A 0.9500 . ? 
C21 C22 1.378(9) . ? 
C21 H21A 0.9500 . ? 
C22 C23 1.345(9) . ? 
C22 H22A 0.9500 . ? 
C23 C24 1.372(6) . ? 
C23 H23A 0.9500 . ? 
C24 H24A 0.9500 . ? 
C25 C26 1.488(6) . ? 
C25 H25A 0.9900 . ? 
C25 H25B 0.9900 . ? 
C26 C27 1.521(7) . ? 
C26 H26A 0.9900 . ? 
C26 H26B 0.9900 . ? 
C27 C28 1.492(6) . ? 
C27 H27A 0.9900 . ? 
C27 H27B 0.9900 . ? 
C28 H28A 0.9900 . ? 
C28 H28B 0.9900 . ? 
C29 C30 1.516(7) . ? 
C29 H29A 0.9900 . ? 
C29 H29B 0.9900 . ? 
C30 C31 1.513(7) . ? 
C30 H30A 0.9900 . ? 
C30 H30B 0.9900 . ? 
C31 C32 1.505(6) . ? 
C31 H31A 0.9900 . ? 
C31 H31B 0.9900 . ? 
C32 H32A 0.9900 . ? 
C32 H32B 0.9900 . ? 
O1TA C1TA 1.227(13) . ? 
O1TA C4TA 1.348(12) . ? 
C1TA C2TA 1.433(14) . ? 
C1TA H1TA 0.9900 . ? 
C1TA H1TB 0.9900 . ? 
C2TA C3TA 1.77(2) . ? 
C2TA H2TA 0.9900 . ? 
C2TA H2TB 0.9900 . ? 
C3TA C4TA 1.490(19) . ? 
C3TA H3TA 0.9900 . ? 
C3TA H3TB 0.9900 . ? 
C4TA H4TA 0.9900 . ? 
C4TA H4TB 0.9900 . ? 
O1TB C4TB 1.482(10) . ? 
O1TB C1TB 1.525(11) . ? 
C1TB C2TB 1.380(10) . ? 
C1TB H1TC 0.9900 . ? 
C1TB H1TD 0.9900 . ? 
C2TB C3TB 1.382(11) . ? 
C2TB H2TC 0.9900 . ? 
C2TB H2TD 0.9900 . ? 
C3TB C4TB 1.485(12) . ? 
C3TB H3TC 0.9900 . ? 
C3TB H3TD 0.9900 . ? 
C4TB H4TC 0.9900 . ? 
C4TB H4TD 0.9900 . ? 
 
loop_ 
 _geom_angle_atom_site_label_1 
 _geom_angle_atom_site_label_2 
 _geom_angle_atom_site_label_3 
 _geom_angle 
 _geom_angle_site_symmetry_1 
 _geom_angle_site_symmetry_3 
 _geom_angle_publ_flag 
O2 Ca1 O1 107.07(10) 3_655 . ? 
O2 Ca1 O4 86.83(10) 3_655 . ? 
O1 Ca1 O4 91.84(11) . . ? 
O2 Ca1 O3 89.43(10) 3_655 . ? 
O1 Ca1 O3 85.60(10) . . ? 
O4 Ca1 O3 174.64(10) . . ? 
O2 Ca1 S1 163.61(8) 3_655 . ? 
O1 Ca1 S1 89.24(8) . . ? 
O4 Ca1 S1 91.24(7) . . ? 
O3 Ca1 S1 93.43(7) . . ? 
O2 Ca1 S2 91.83(7) 3_655 . ? 
O1 Ca1 S2 159.71(8) . . ? 
O4 Ca1 S2 96.62(8) . . ? 
O3 Ca1 S2 87.32(7) . . ? 
S1 Ca1 S2 72.22(3) . . ? 
O2 Ca1 P1 127.94(7) 3_655 . ? 
O1 Ca1 P1 124.01(8) . . ? 
O4 Ca1 P1 99.95(7) . . ? 
O3 Ca1 P1 85.38(7) . . ? 
S1 Ca1 P1 36.57(2) . . ? 
S2 Ca1 P1 36.27(2) . . ? 
O2 Ca1 P2 94.95(7) 3_655 . ? 
O1 Ca1 P2 13.55(7) . . ? 
O4 Ca1 P2 85.09(8) . . ? 
O3 Ca1 P2 91.43(7) . . ? 
S1 Ca1 P2 101.10(3) . . ? 
S2 Ca1 P2 173.10(3) . . ? 
P1 Ca1 P2 136.87(3) . . ? 
P1 S1 Ca1 85.69(4) . . ? 
P1 S2 Ca1 84.13(4) . . ? 
C7 P1 C1 104.68(15) . . ? 
C7 P1 S2 109.63(13) . . ? 
C1 P1 S2 110.16(12) . . ? 
C7 P1 S1 108.34(11) . . ? 
C1 P1 S1 107.43(12) . . ? 
S2 P1 S1 115.98(5) . . ? 
C7 P1 Ca1 139.04(11) . . ? 
C1 P1 Ca1 116.17(11) . . ? 
S2 P1 Ca1 59.60(3) . . ? 
S1 P1 Ca1 57.74(3) . . ? 
O1 P2 O2 118.01(16) . . ? 
O1 P2 C19 108.51(17) . . ? 
O2 P2 C19 107.59(15) . . ? 
O1 P2 C13 109.08(19) . . ? 
O2 P2 C13 107.17(19) . . ? 
C19 P2 C13 105.84(16) . . ? 
O1 P2 Ca1 20.62(12) . . ? 
O2 P2 Ca1 98.04(11) . . ? 
C19 P2 Ca1 113.32(11) . . ? 
C13 P2 Ca1 123.57(13) . . ? 
P2 O1 Ca1 145.84(18) . . ? 
P2 O2 Ca1 162.14(17) . 3_655 ? 
C25 O3 C28 108.6(3) . . ? 
C25 O3 Ca1 124.7(2) . . ? 
C28 O3 Ca1 124.7(2) . . ? 
C32 O4 C29 107.2(3) . . ? 
C32 O4 Ca1 123.0(2) . . ? 
C29 O4 Ca1 129.8(2) . . ? 
C6 C1 C2 120.3(3) . . ? 
C6 C1 P1 120.6(3) . . ? 
C2 C1 P1 119.1(3) . . ? 
C1 C2 C3 120.3(4) . . ? 
C1 C2 H2A 119.8 . . ? 
C3 C2 H2A 119.8 . . ? 
C4 C3 C2 119.0(4) . . ? 
C4 C3 H3A 120.5 . . ? 
C2 C3 H3A 120.5 . . ? 
C5 C4 C3 120.9(4) . . ? 
C5 C4 H4A 119.6 . . ? 
C3 C4 H4A 119.6 . . ? 
C4 C5 C6 120.2(4) . . ? 
C4 C5 H5A 119.9 . . ? 
C6 C5 H5A 119.9 . . ? 
C1 C6 C5 119.3(4) . . ? 
C1 C6 H6A 120.4 . . ? 
C5 C6 H6A 120.4 . . ? 
C12 C7 C8 118.9(3) . . ? 
C12 C7 P1 121.0(3) . . ? 
C8 C7 P1 120.1(3) . . ? 
C9 C8 C7 120.3(4) . . ? 
C9 C8 H8A 119.9 . . ? 
C7 C8 H8A 119.9 . . ? 
C10 C9 C8 120.0(4) . . ? 
C10 C9 H9A 120.0 . . ? 
C8 C9 H9A 120.0 . . ? 
C11 C10 C9 120.0(4) . . ? 
C11 C10 H10A 120.0 . . ? 
C9 C10 H10A 120.0 . . ? 
C10 C11 C12 121.0(4) . . ? 
C10 C11 H11A 119.5 . . ? 
C12 C11 H11A 119.5 . . ? 
C11 C12 C7 119.8(4) . . ? 
C11 C12 H12A 120.1 . . ? 
C7 C12 H12A 120.1 . . ? 
C18 C13 C14 118.3(4) . . ? 
C18 C13 P2 120.7(4) . . ? 
C14 C13 P2 120.9(3) . . ? 
C15 C14 C13 123.1(6) . . ? 
C15 C14 H14A 118.4 . . ? 
C13 C14 H14A 118.4 . . ? 
C14 C15 C16 118.1(6) . . ? 
C14 C15 H15A 121.0 . . ? 
C16 C15 H15A 121.0 . . ? 
C17 C16 C15 121.8(6) . . ? 
C17 C16 H16A 119.1 . . ? 
C15 C16 H16A 119.1 . . ? 
C16 C17 C18 119.3(6) . . ? 
C16 C17 H17A 120.3 . . ? 
C18 C17 H17A 120.3 . . ? 
C13 C18 C17 119.3(6) . . ? 
C13 C18 H18A 120.3 . . ? 
C17 C18 H18A 120.3 . . ? 
C20 C19 C24 118.1(4) . . ? 
C20 C19 P2 121.9(3) . . ? 
C24 C19 P2 120.0(3) . . ? 
C19 C20 C21 119.7(5) . . ? 
C19 C20 H20A 120.1 . . ? 
C21 C20 H20A 120.1 . . ? 
C22 C21 C20 119.7(5) . . ? 
C22 C21 H21A 120.1 . . ? 
C20 C21 H21A 120.1 . . ? 
C23 C22 C21 121.1(5) . . ? 
C23 C22 H22A 119.5 . . ? 
C21 C22 H22A 119.5 . . ? 
C22 C23 C24 119.2(5) . . ? 
C22 C23 H23A 120.4 . . ? 
C24 C23 H23A 120.4 . . ? 
C23 C24 C19 122.1(5) . . ? 
C23 C24 H24A 118.9 . . ? 
C19 C24 H24A 118.9 . . ? 
O3 C25 C26 106.1(3) . . ? 
O3 C25 H25A 110.5 . . ? 
C26 C25 H25A 110.5 . . ? 
O3 C25 H25B 110.5 . . ? 
C26 C25 H25B 110.5 . . ? 
H25A C25 H25B 108.7 . . ? 
C25 C26 C27 101.7(3) . . ? 
C25 C26 H26A 111.4 . . ? 
C27 C26 H26A 111.4 . . ? 
C25 C26 H26B 111.4 . . ? 
C27 C26 H26B 111.4 . . ? 
H26A C26 H26B 109.3 . . ? 
C28 C27 C26 103.4(3) . . ? 
C28 C27 H27A 111.1 . . ? 
C26 C27 H27A 111.1 . . ? 
C28 C27 H27B 111.1 . . ? 
C26 C27 H27B 111.1 . . ? 
H27A C27 H27B 109.1 . . ? 
O3 C28 C27 106.7(3) . . ? 
O3 C28 H28A 110.4 . . ? 
C27 C28 H28A 110.4 . . ? 
O3 C28 H28B 110.4 . . ? 
C27 C28 H28B 110.4 . . ? 
H28A C28 H28B 108.6 . . ? 
O4 C29 C30 105.4(4) . . ? 
O4 C29 H29A 110.7 . . ? 
C30 C29 H29A 110.7 . . ? 
O4 C29 H29B 110.7 . . ? 
C30 C29 H29B 110.7 . . ? 
H29A C29 H29B 108.8 . . ? 
C29 C30 C31 106.1(3) . . ? 
C29 C30 H30A 110.5 . . ? 
C31 C30 H30A 110.5 . . ? 
C29 C30 H30B 110.5 . . ? 
C31 C30 H30B 110.5 . . ? 
H30A C30 H30B 108.7 . . ? 
C32 C31 C30 104.2(4) . . ? 
C32 C31 H31A 110.9 . . ? 
C30 C31 H31A 110.9 . . ? 
C32 C31 H31B 110.9 . . ? 
C30 C31 H31B 110.9 . . ? 
H31A C31 H31B 108.9 . . ? 
O4 C32 C31 104.9(3) . . ? 
O4 C32 H32A 110.8 . . ? 
C31 C32 H32A 110.8 . . ? 
O4 C32 H32B 110.8 . . ? 
C31 C32 H32B 110.8 . . ? 
H32A C32 H32B 108.9 . . ? 
C1TA O1TA C4TA 112.3(10) . . ? 
O1TA C1TA C2TA 113.7(12) . . ? 
O1TA C1TA H1TA 108.8 . . ? 
C2TA C1TA H1TA 108.8 . . ? 
O1TA C1TA H1TB 108.8 . . ? 
C2TA C1TA H1TB 108.8 . . ? 
H1TA C1TA H1TB 107.7 . . ? 
C1TA C2TA C3TA 103.0(9) . . ? 
C1TA C2TA H2TA 111.2 . . ? 
C3TA C2TA H2TA 111.2 . . ? 
C1TA C2TA H2TB 111.2 . . ? 
C3TA C2TA H2TB 111.2 . . ? 
H2TA C2TA H2TB 109.1 . . ? 
C4TA C3TA C2TA 90.2(9) . . ? 
C4TA C3TA H3TA 113.6 . . ? 
C2TA C3TA H3TA 113.6 . . ? 
C4TA C3TA H3TB 113.6 . . ? 
C2TA C3TA H3TB 113.6 . . ? 
H3TA C3TA H3TB 110.9 . . ? 
O1TA C4TA C3TA 116.0(10) . . ? 
O1TA C4TA H4TA 108.3 . . ? 
C3TA C4TA H4TA 108.3 . . ? 
O1TA C4TA H4TB 108.3 . . ? 
C3TA C4TA H4TB 108.3 . . ? 
H4TA C4TA H4TB 107.4 . . ? 
C4TB O1TB C1TB 102.9(6) . . ? 
C2TB C1TB O1TB 107.6(6) . . ? 
C2TB C1TB H1TC 110.2 . . ? 
O1TB C1TB H1TC 110.2 . . ? 
C2TB C1TB H1TD 110.2 . . ? 
O1TB C1TB H1TD 110.2 . . ? 
H1TC C1TB H1TD 108.5 . . ? 
C1TB C2TB C3TB 108.8(7) . . ? 
C1TB C2TB H2TC 109.9 . . ? 
C3TB C2TB H2TC 109.9 . . ? 
C1TB C2TB H2TD 109.9 . . ? 
C3TB C2TB H2TD 109.9 . . ? 
H2TC C2TB H2TD 108.3 . . ? 
C2TB C3TB C4TB 105.2(6) . . ? 
C2TB C3TB H3TC 110.7 . . ? 
C4TB C3TB H3TC 110.7 . . ? 
C2TB C3TB H3TD 110.7 . . ? 
C4TB C3TB H3TD 110.7 . . ? 
H3TC C3TB H3TD 108.8 . . ? 
C3TB C4TB O1TB 103.3(7) . . ? 
C3TB C4TB H4TC 111.1 . . ? 
O1TB C4TB H4TC 111.1 . . ? 
C3TB C4TB H4TD 111.1 . . ? 
O1TB C4TB H4TD 111.1 . . ? 
H4TC C4TB H4TD 109.1 . . ? 
 
_diffrn_measured_fraction_theta_max    0.992 
_diffrn_reflns_theta_full              27.49 
_diffrn_measured_fraction_theta_full   0.992 
_refine_diff_density_max    1.225 
_refine_diff_density_min   -0.407 
_refine_diff_density_rms    0.129
